# Supplementary material for: Metal-free phosphine-catalyzed visible-light-induced radical cyclization of alkenes: access to cyclic gem-difluoroacyl scaffolds
Source: Royal Society of Chemistry journal article supplement (doi:10.1039/d4qo00503a), 2024-01-01

## Support Information

### **Metal-Free Phosphine-Catalyzed Visible-Light-Induced Radical Cyclization of Alkenes: Access to Cyclic *gem*-Difluoroacyl Scaffolds**

Ruowen Li<sup>a</sup>, Yicong Li<sup>a</sup>, Yiwei Liu<sup>a</sup>, Yanzhao Wang<sup>\*a</sup>, Jingjing Wu<sup>\*ab</sup>, Fanhong Wu<sup>\*a</sup>

<sup>a</sup> School of Chemical and Environmental Engineering and Shanghai Engineering  
Research Center of Green Fluoropharmaceutical Technology, Shanghai Institute of  
Technology, Shanghai 201418, China;

<sup>b</sup>Key Laboratory of Organofluorine Chemistry, Shanghai Institute of Organic  
Chemistry, Chinese Academy of Sciences, Shanghai 200032, China.

E-mail: [wyz@sit.edu.cn](mailto:wyz@sit.edu.cn), [wujj@sit.edu.cn](mailto:wujj@sit.edu.cn), [wfh@sit.edu.cn](mailto:wfh@sit.edu.cn)

# Contents

|                                                                            |    |
|----------------------------------------------------------------------------|----|
| 1 General Information .....                                                | 1  |
| 2 Experimental procedures .....                                            | 2  |
| 2.1 Typical synthesis methods of 3aa .....                                 | 2  |
| 2.2 Typical synthesis methods of 4aa .....                                 | 2  |
| 2.3 Experimental setup .....                                               | 2  |
| 3 Optimization details of the reaction conditions .....                    | 3  |
| 4 Synthesis of raw materials .....                                         | 4  |
| 4.1 Preparation of 2-bromo-2,2-difluoroketones .....                       | 4  |
| 4.2 Synthesis of complex olefins .....                                     | 4  |
| 5 Mechanistic Studies .....                                                | 5  |
| 5.1 Trapping experiment with TEMPO .....                                   | 5  |
| 5.2 Switch on and off the light experiment .....                           | 6  |
| 5.3 UV-Vis absorption experiment .....                                     | 7  |
| 5.4 DFT calculations .....                                                 | 8  |
| 5.4.1 Computational Details .....                                          | 8  |
| 5.4.2 Cartesian Coordinate .....                                           | 9  |
| 5.5 Another possible reaction mechanism .....                              | 17 |
| 6 Characterization data of all products .....                              | 18 |
| 7 References .....                                                         | 34 |
| 8 NMR spectra ( <sup>1</sup> H, <sup>13</sup> C and <sup>19</sup> F) ..... | 35 |
| 9 X-Ray structures .....                                                   | 92 |

# 1 General Information

All reagents were commercially available and used without further purification unless indicated otherwise. Reagents were purchased at the highest commercial quality and used without further purification, unless otherwise stated. Reactions were monitored by thin layer chromatography (TLC) carried out on GF254 plates (0.25mm layer thickness) using UV light or 5% molybdophosphoric acid solution as visualizing agent. Flash chromatography was performed with 200-300 mesh silica gels. All NMR spectra were recorded on a Quantun-IPlusNMR 400 (model: Qone AS400, resonance frequencies 400MHz for  $^1\text{H}$  and 100 MHz for  $^{13}\text{C}$  and 376 MHz for  $^{19}\text{F}$ ) or Bruker AVANCE III 500 MHz. The samples were dissolved in 0.6 mL  $\text{CDCl}_3$  (99.8 % D.TMS). Chemical shifts were given in values of  $\delta$  H and  $\delta$  C referenced to residual solvent signals ( $\delta$  H 7.26 for  $^1\text{H}$ ,  $\delta$  C 77.0 for  $^{13}\text{C}$  in  $\text{CDCl}_3$ ). Data are presented in the following space: chemical shift, multiplicity, coupling constant in hertz (Hz), and signal area integration in natural numbers.  $^1\text{H}$ ,  $^{13}\text{C}$  and  $^{19}\text{F}$  multiplicities are reported as follows: singlet (s), doublet (d), triplet (t), quartet (q), doublet of doublets (dd), doublet of doublets of doublets (ddd), and multiplet (m). High resolution mass spectra (HRMS) were recorded on a Bruker solan X 70 FT-MS (samples was dissolved in  $\text{CH}_3\text{OH}$  and the ion source was ESI). Blue LEDs (40 W) were used as the irradiation light.

## 2 Experimental procedures

### 2.1 Typical synthesis methods of 3aa

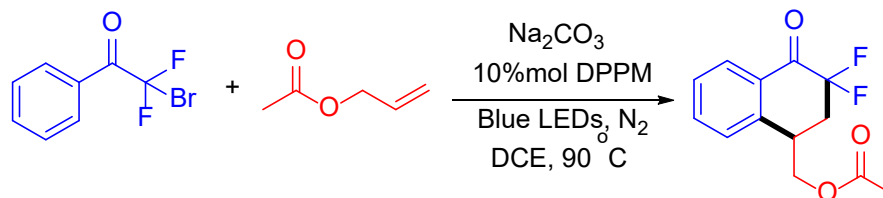

Take a 25 ml dry reaction tube and add a suitable size magneton, then add dppm (38.4 mg, 10 mol%) and  $\text{Na}_2\text{CO}_3$  (265.0 mg, 2.5 eq) in turn. After  $\text{N}_2$  is replaced for three times, add allyl acetate (100.1 mg, 1 mmol) and  $\text{BrCF}_2\text{COC}_6\text{H}_5$  (470.1 mg, 2.0 eq) under the  $\text{N}_2$  stream. Finally, the reaction was stirred for 24 hours under blue LEDs (the light source is 5 cm away from the reaction device). After the completion of the reaction, add 60 mL of water and ethyl acetate to extract three times, dry with anhydrous  $\text{Na}_2\text{SO}_4$  for 30 minutes, filter and concentrate. The residue was purified by silica gel column chromatography using a petroleum ether/AcOEt (30:1) as the eluent to give the corresponding products.

### 2.2 Typical synthesis methods of 4aa

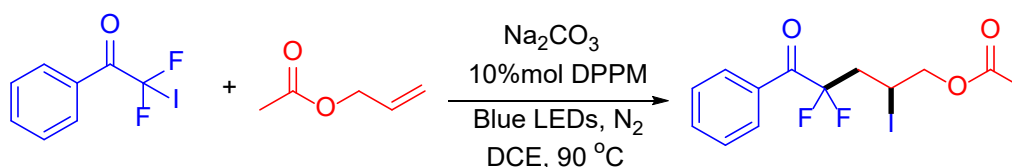

Take a 25 ml dry reaction tube and add a suitable size magneton, then add dppm (38.4 mg, 10 mol%) and  $\text{Na}_2\text{CO}_3$  (265.0 mg, 2.5 eq) in turn. After  $\text{N}_2$  is replaced for three times, add allyl acetate (100.1 mg, 1 mmol) and  $\text{ICF}_2\text{COC}_6\text{H}_5$  (564.1 mg, 2.0 eq) under the  $\text{N}_2$  stream. Finally, the reaction was stirred for 24 hours under blue LEDs (the light source is 5 cm away from the reaction device). After the completion of the reaction, add 60 mL of water and ethyl acetate to extract three times, dry with anhydrous  $\text{Na}_2\text{SO}_4$  for 30 minutes, filter and concentrate. The residue was purified by silica gel column chromatography using a petroleum ether/AcOEt (30:1) as the eluent to give the corresponding products.

### 2.3 Experimental setup

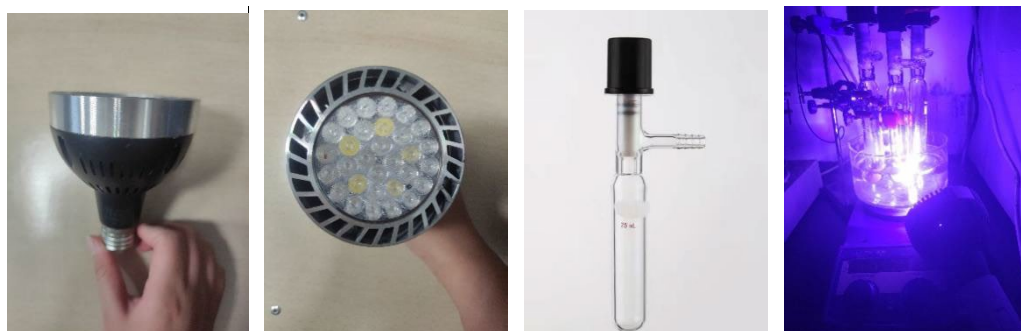

Spot Lamp 460-470 nm. (For more details: [taobao]

<https://item.taobao.com/item.htm?spm=2013.1.w400415722417492.24.21f6209ekm032z&id=597700668537>). The seal tube was positioned on a stir plate approximately 5 cm away from the LED.

### 3 Optimization details of the reaction conditions

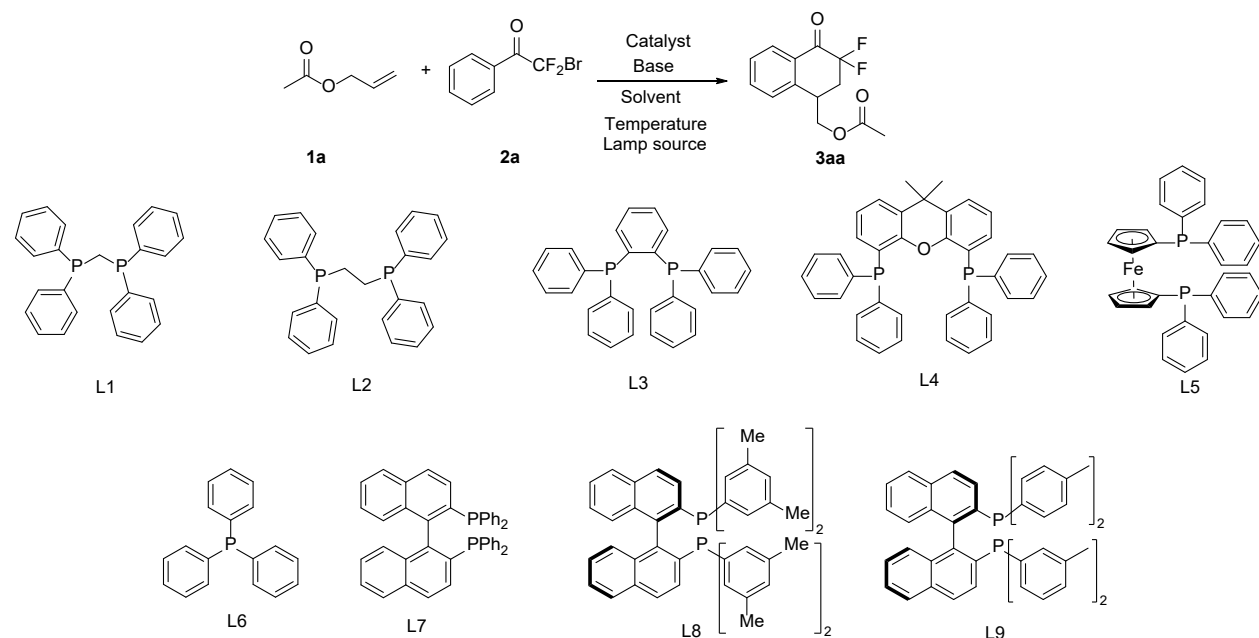

| Entry | Phosphine | Base                            | Solvent | Temperature | Yield <sup>c</sup> (%) |
|-------|-----------|---------------------------------|---------|-------------|------------------------|
| 1     | L1        | Na <sub>2</sub> CO <sub>3</sub> | DCE     | 90 °C       | 81                     |
| 2     | L2        | Na <sub>2</sub> CO <sub>3</sub> | DCE     | 90 °C       | 8                      |
| 3     | L3        | Na <sub>2</sub> CO <sub>3</sub> | DCE     | 90 °C       | 32                     |
| 4     | L4        | Na <sub>2</sub> CO <sub>3</sub> | DCE     | 90 °C       | 31                     |
| 5     | L5        | Na <sub>2</sub> CO <sub>3</sub> | DCE     | 90 °C       | 36                     |
| 6     | L6        | Na <sub>2</sub> CO <sub>3</sub> | DCE     | 90 °C       | 33                     |
| 7     | L7        | Na <sub>2</sub> CO <sub>3</sub> | DCE     | 90 °C       | 57                     |
| 8     | L8        | Na <sub>2</sub> CO <sub>3</sub> | DCE     | 90 °C       | 51                     |
| 9     | L9        | Na <sub>2</sub> CO <sub>3</sub> | DCE     | 90 °C       | 55                     |
| 10    | —         | Na <sub>2</sub> CO <sub>3</sub> | DCE     | 90 °C       | 7                      |
| 11    | L1        | K <sub>2</sub> CO <sub>3</sub>  | DCE     | 90 °C       | 57                     |

|                 |    |                                 |                    |        |       |
|-----------------|----|---------------------------------|--------------------|--------|-------|
| 12              | L1 | Cs <sub>2</sub> CO <sub>3</sub> | DCE                | 90 °C  | 23    |
| 13              | L1 | KOH                             | DCE                | 90 °C  | Trace |
| 14              | L1 | NaOH                            | DCE                | 90 °C  | Trace |
| 15              | L1 | <sup>t</sup> BuOK               | DCE                | 90 °C  | Trace |
| 16              | L1 | KOAc                            | DCE                | 90 °C  | 32    |
| 17              | L1 | Et <sub>3</sub> N               | DCE                | 90 °C  | 44    |
| 18              | L1 | TMEDA                           | DCE                | 90 °C  | 22    |
| 19              | L1 | —                               | DCE                | 90 °C  | Trace |
| 20              | L1 | Na <sub>2</sub> CO <sub>3</sub> | CH <sub>3</sub> CN | 90 °C  | 69    |
| 21              | L1 | Na <sub>2</sub> CO <sub>3</sub> | DMF                | 90 °C  | 23    |
| 22              | L1 | Na <sub>2</sub> CO <sub>3</sub> | DMSO               | 90 °C  | N.D.  |
| 23              | L1 | Na <sub>2</sub> CO <sub>3</sub> | THF                | 90 °C  | 40    |
| 24              | L1 | Na <sub>2</sub> CO <sub>3</sub> | DME                | 90 °C  | 15    |
| 25              | L1 | Na <sub>2</sub> CO <sub>3</sub> | DCM                | R.T.   | 48    |
| 26              | L1 | Na <sub>2</sub> CO <sub>3</sub> | DCE                | 100 °C | 69    |
| 27              | L1 | Na <sub>2</sub> CO <sub>3</sub> | DCE                | 60 °C  | 48    |
| 28              | L1 | Na <sub>2</sub> CO <sub>3</sub> | DCE                | 30 °C  | 45    |
| 29 <sup>b</sup> | L1 | Na <sub>2</sub> CO <sub>3</sub> | DCE                | 90 °C  | 60    |

<sup>a</sup> Reaction conditions: **1a** (0.2 mmol), **2a** (0.4mmol), phosphine (10 mol%), Base (0.5mmol), solvent (2.0 mL), blue LED 40 W, 90 °C, N<sub>2</sub>, 24 h. <sup>b</sup> Blue LED 18W instead of blue LED 40W. <sup>c</sup>Yields determined by <sup>19</sup>F NMR analysis using Benzotrifluoride as the internal standard.

## 4 Synthesis of raw materials

### 4.1 Preparation of 2-bromo-2,2-difluoroketones

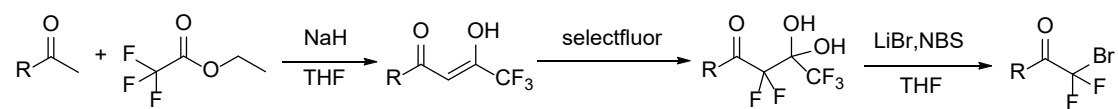

The 2-bromo-2,2-difluoroacetophenones **1a-1q** were prepared according to the reported procedure.<sup>[1]</sup> As shown above, the intermediates enols were obtained from the reaction of ethyl 2,2,2-trifluoroacetate and ketones. The enols reacted with Selectfluor® to form fluorinated gem-diols, which then reacted with N-Bromosuccinimide to afford 2-bromo-2,2 difluoroacetophenones **1a-1q** using the trifluoroacetate release conditions.

### 4.2 Synthesis of complex olefins

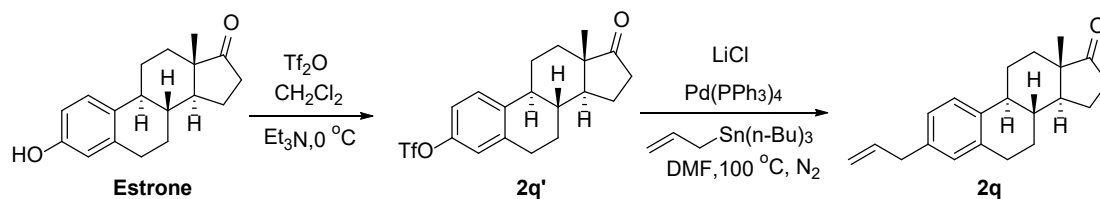

The Estra-1,3,5(10)-trien-17-one, 3-(2-propen-1-yl) **2q** were prepared according to the reported procedure.<sup>[2]</sup> To an oven-dried round-bottom flask with a stir bar was added Estrone starting material (1.0 equiv),  $\text{CH}_2\text{Cl}_2$  (0.2 M),  $\text{Et}_3\text{N}$  (2.0 equiv). The reaction was cooled to  $0^\circ\text{C}$ . Trifluoromethanesulfonic anhydride  $\text{Tf}_2\text{O}$  (1.2 equiv) was added dropwise and the reaction was stirred at  $0^\circ\text{C}$  for 30 min. After warming up to room temperature, the reaction was quenched with addition of cold water. The layers were separated, and the aqueous layer was extracted with  $\text{CH}_2\text{Cl}_2$  (20 mL x 3). The organic layers were combined and concentrated under reduced pressure. The crude mixture was purified by flash column chromatography to the **2q'**.

To an oven-dried round bottom flask equipped with condenser was added a stir bar,  $\text{LiCl}$  (4.0 equiv),  $\text{DMF}$  (0.25 M), allyltributylstannane (1.1 equiv), **2q'** (1.0 equiv) and  $\text{Pd}(\text{PPh}_3)_4$  (0.03 equiv). The reaction was heated to  $100^\circ\text{C}$  and stirred for 12 hours. Upon completion, the reaction was cooled to room temperature, transferred into a separatory funnel with iced 10%  $\text{NH}_4\text{OH}$  solution (1:1 to  $\text{DMF}$ ) and shake vigorously. Layers were separated, aqueous layer was extracted with ethyl acetate (30 mL x 3). The organic layers were combined and concentrated under reduced pressure. The crude mixture was purified by flash column chromatography to give allylated olefin product **2q**.

## 5 Mechanistic Studies

### 5.1 Trapping experiment with TEMPO

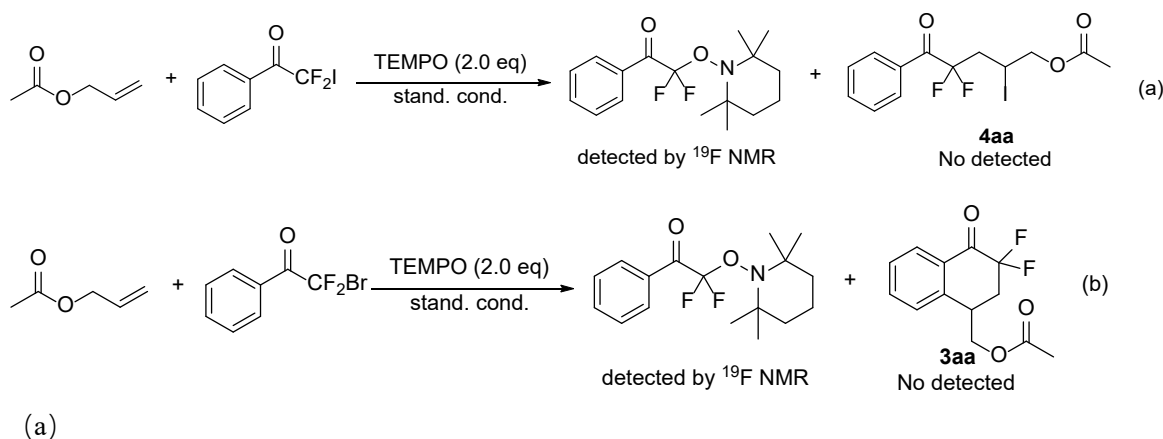

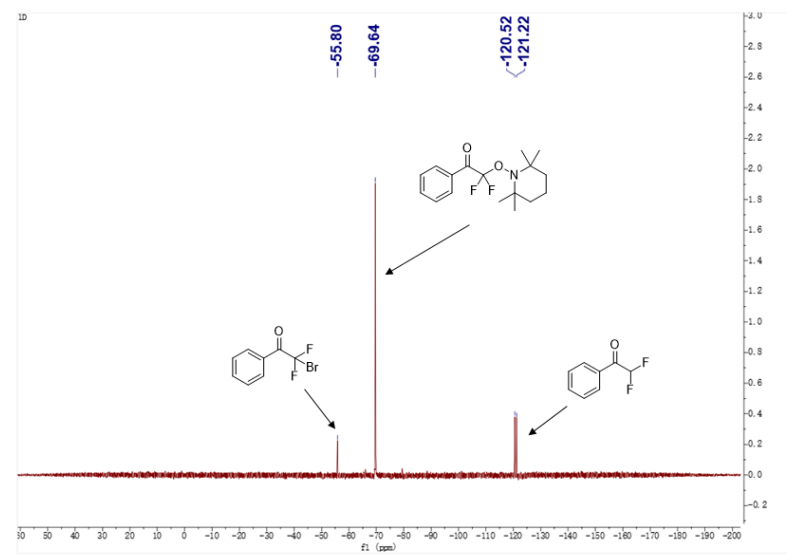

(b)

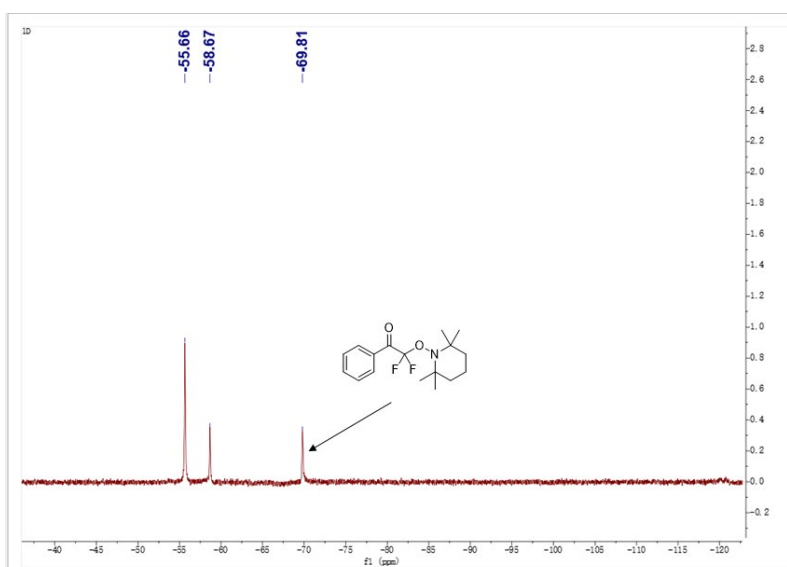

## 5.2 Switch on and off the light experiment

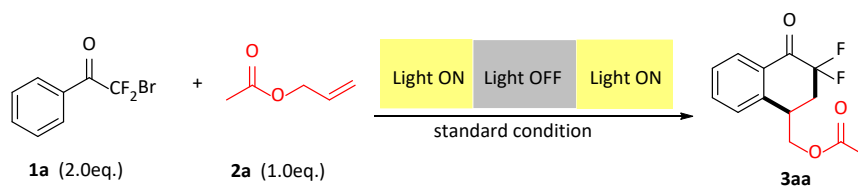



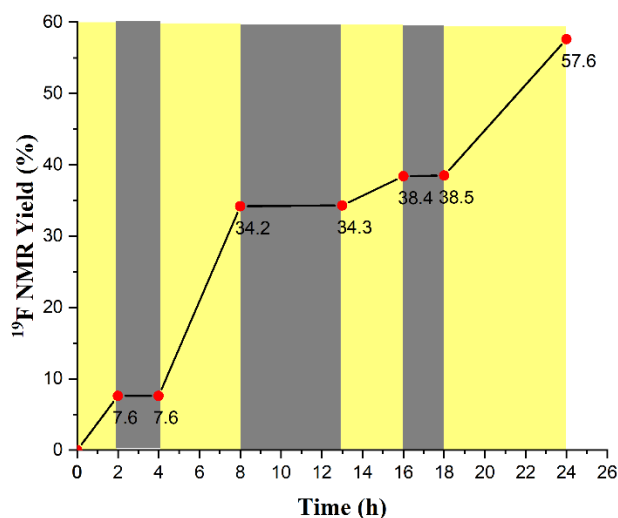

The results of the on-off lamp experiment of the phosphine-catalyzed radical cyclization of 2-bromo-2,2-difluoroacetophenone (**1a**) and allyl acetate (**2a**) show that there is no product formation in the dark, which suggested that an extended radical chain process is unlikely.

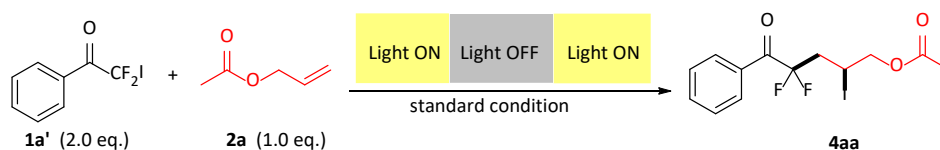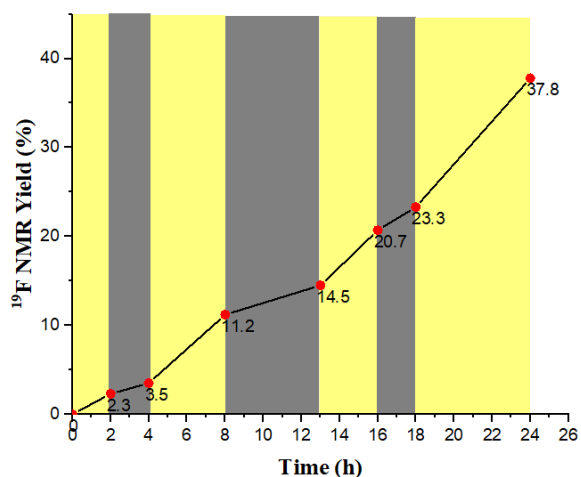

In addition, we also performed an on-off lamp experiment of the addition reaction of iododifluoroacetyl to allyl acetate, the reaction was found to proceed continuously when the light was turned off, but with a slower rate, which indicated that a radical-chain process might be involved in this reaction.

### 5.3 UV-Vis absorption experiment

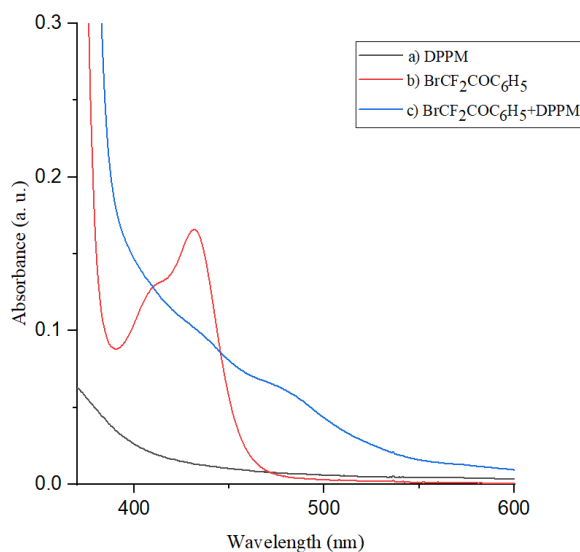

UV-Vis absorption were recorded using Shimadzu UV-1800 spectrophotometer for all experiments. Four solutions were prepared:

- DPPM (0.5 mmol) in DCE (5.0 mL).
- 2-bromo-2,2-difluoroacetophenone **1a** (0.5 mmol) in DCE (5.0 mL).
- 2-bromo-2,2-difluoroacetophenone **1a** (0.5 mmol) and DPPM (0.5 mmol) in DCE (5.0 mL).

As shown in Figure above, DPPM has no absorption in the visible-light region (curve **a**). A medium visible-light absorption of 2-bromo-2,2-difluoroacetophenone (**1a**) was detected at 280-430 nm (curve **b**). The mixture of DPPM with **1a** shows a red shift and a new absorption band (curve **c**) in the visible region (416-520 nm). This redshift may support the formation of an electron donor-acceptor complex (EDA complex) between 2-bromo-2,2-difluoroacetophenone and DPPM in the reaction mixture.

## 5.4 DFT calculations

### 5.4.1 Computational Details

Structures of the reactants, intermediates, transition states, and products were optimized in dichloroethane at the M06-2X/def2-tzvp level using Gaussian16. The solvation effect was introduced via SMD model. At the same computational level, vibrational frequencies were calculated to confirm the local minima with all positive frequencies and transition states with only one imaginary frequency. Intrinsic reaction coordinate (IRC) calculations were performed at the M06-2X/def2-tzvp level to verify that the optimized geometry is truly a transition state, which connects the designated intermediates. The electronic energies (Gibbs free energies and Enthalpies) of all the complexes are listed in Table S1.

**Table S1.** The electronic energies, Gibbs free energies and Enthalpies of all the complexes

| (Hartree) | Electronic | Free Energy | Enthalpy |
|-----------|------------|-------------|----------|
|-----------|------------|-------------|----------|

|                    | Energy     |            |            |
|--------------------|------------|------------|------------|
| IV + II            | -5151.3038 | -5150.7786 | -5150.6227 |
| TS1 + II           | -5151.2870 | -5150.7559 | -5150.6065 |
| V + II             | -5151.3239 | -5150.7905 | -5150.6413 |
| VII + dppm + (Br-) | -5151.2905 | -5150.7667 | -5150.6074 |
| 3aa + HBr + dppm   | -5151.3794 | -5150.8628 | -5150.7001 |
| VI + dppm          | -5151.3722 | -5150.8375 | -5150.6882 |
| 2FBrPh             | -3156.9762 | -3156.9014 | -3156.8514 |
| dppm               | -1648.5676 | -1648.2256 | -1648.1462 |
| 2FBrPh-dppm        | -4805.5466 | -4805.1131 | -4804.9985 |

#### 5.4.2 Cartesian Coordinate

| IV |             |             |             |
|----|-------------|-------------|-------------|
| C  | 4.40139500  | 2.33610000  | 0.16159800  |
| C  | 4.95138400  | 1.17212200  | -0.36534500 |
| C  | 4.17258500  | 0.03560100  | -0.48685800 |
| C  | 2.83700300  | 0.04605100  | -0.07600400 |
| C  | 2.29166200  | 1.21620600  | 0.45570400  |
| C  | 3.07448500  | 2.35634100  | 0.56805600  |
| H  | 5.00909400  | 3.22730400  | 0.25569000  |
| H  | 5.98640900  | 1.15403300  | -0.68097200 |
| H  | 4.58746100  | -0.87512800 | -0.89817300 |
| H  | 1.26395400  | 1.25524300  | 0.78659200  |
| H  | 2.64529800  | 3.26113400  | 0.97824100  |
| C  | 2.06968700  | -1.21631800 | -0.26027700 |
| O  | 2.51861100  | -2.16611400 | -0.84953900 |
| C  | 0.62175300  | -1.33703600 | 0.26923000  |
| F  | 0.35059400  | -2.65675000 | 0.43288200  |
| F  | 0.53755800  | -0.79230900 | 1.51757200  |
| C  | -0.40567300 | -0.72490900 | -0.66276800 |
| C  | -1.78537300 | -0.85257800 | -0.12565200 |
| H  | -0.29008400 | -1.24236700 | -1.62535800 |
| H  | -0.14656600 | 0.32199400  | -0.83703300 |
| C  | -2.82709200 | 0.09729400  | -0.57314300 |
| H  | -2.10142400 | -1.78279300 | 0.32812400  |
| H  | -2.44987300 | 1.12433600  | -0.54418900 |
| H  | -3.13709200 | -0.11539700 | -1.60536600 |
| O  | -3.95414600 | -0.04279700 | 0.29900900  |
| C  | -5.07176100 | 0.67600400  | 0.10371700  |
| O  | -5.99069600 | 0.51107200  | 0.86253300  |
| C  | -5.10128100 | 1.63961100  | -1.04493800 |
| H  | -4.29448600 | 2.36803300  | -0.95487200 |
| H  | -4.96991300 | 1.11029100  | -1.98964800 |
| H  | -6.05894100 | 2.15063400  | -1.04307700 |
|    |             |             |             |

|           |             |             |             |
|-----------|-------------|-------------|-------------|
| <b>II</b> |             |             |             |
| C         | 4.13800200  | -0.48716300 | 0.61657700  |
| C         | 5.23258600  | -1.23253300 | 1.04141900  |
| C         | 5.23354700  | -2.61373300 | 0.91215800  |
| C         | 4.13640500  | -3.24961300 | 0.34179700  |
| C         | 3.04829500  | -2.50666100 | -0.09006100 |
| C         | 3.02729600  | -1.11626400 | 0.05622200  |
| H         | 4.15793500  | 0.58982600  | 0.72549900  |
| H         | 6.08565100  | -0.72714400 | 1.47711200  |
| H         | 6.08533800  | -3.19241600 | 1.24644100  |
| H         | 4.13112500  | -4.32622700 | 0.22512400  |
| H         | 2.21091000  | -3.01613400 | -0.55524600 |
| P         | 1.59808800  | -0.19751400 | -0.64707800 |
| C         | 1.76871800  | 1.45517200  | 0.12921600  |
| C         | 1.90691100  | 2.54881700  | -0.72195200 |
| C         | 1.76805200  | 1.66964200  | 1.50934500  |
| C         | 2.03570600  | 3.83565700  | -0.20860400 |
| H         | 1.90542000  | 2.39445200  | -1.79515700 |
| C         | 1.89233900  | 2.95123700  | 2.02309600  |
| H         | 1.68086200  | 0.83178300  | 2.19169800  |
| C         | 2.02493000  | 4.03782300  | 1.16321200  |
| H         | 2.13677700  | 4.67675800  | -0.88320000 |
| H         | 1.88966400  | 3.10514300  | 3.09505600  |
| H         | 2.12029600  | 5.03857100  | 1.56582300  |
| C         | 0.25171500  | -0.95052000 | 0.39542700  |
| H         | 0.32931700  | -0.64039300 | 1.43937600  |
| H         | 0.37101000  | -2.03465100 | 0.34545700  |
| P         | -1.41611900 | -0.58725300 | -0.23946600 |
| C         | -2.56045700 | -0.83599900 | 1.12462800  |
| C         | -2.26246300 | -1.72959100 | 2.15644200  |
| C         | -3.81927800 | -0.22608200 | 1.08609300  |
| C         | -3.19925400 | -1.98441600 | 3.14820400  |
| H         | -1.30054300 | -2.22569900 | 2.19232000  |
| C         | -4.74714800 | -0.48279900 | 2.08190200  |
| H         | -4.06834100 | 0.45372200  | 0.27966200  |
| C         | -4.43957400 | -1.36089300 | 3.11593200  |
| H         | -2.95683100 | -2.67168900 | 3.94878400  |
| H         | -5.71472700 | 0.00172300  | 2.05011800  |
| H         | -5.16731600 | -1.56035200 | 3.89208800  |
| C         | -1.48152300 | 1.16816600  | -0.67328800 |
| C         | -1.36446500 | 1.53862200  | -2.01079900 |
| C         | -1.59748200 | 2.15025100  | 0.31463800  |
| C         | -1.36087200 | 2.88437400  | -2.35990600 |
| H         | -1.27629200 | 0.77560600  | -2.77489800 |
| C         | -1.59391800 | 3.48955900  | -0.03987300 |
| H         | -1.68389400 | 1.86598200  | 1.35696800  |
| C         | -1.47651600 | 3.85679600  | -1.37761900 |
| H         | -1.27056000 | 3.16862100  | -3.40052500 |

|              |             |             |             |
|--------------|-------------|-------------|-------------|
| H            | -1.67754800 | 4.24891400  | 0.72749700  |
| H            | -1.47381000 | 4.90476300  | -1.65035500 |
| Br           | -1.38895100 | -2.19282100 | -2.42304800 |
|              |             |             |             |
| <b>IV TS</b> |             |             |             |
| C            | -1.49856500 | 3.17266700  | 0.20246400  |
| C            | -2.77334900 | 2.65489300  | -0.06914200 |
| C            | -2.99086300 | 1.29098100  | 0.00666400  |
| C            | -1.94750400 | 0.42622700  | 0.33131200  |
| C            | -0.63924900 | 0.93476900  | 0.55006300  |
| C            | -0.45778400 | 2.33671100  | 0.53775500  |
| H            | -1.33946500 | 4.24350000  | 0.16995800  |
| H            | -3.58517300 | 3.32127100  | -0.32874300 |
| H            | -3.96684400 | 0.87267100  | -0.20616300 |
| H            | 0.51265100  | 2.74540600  | 0.79009900  |
| C            | -2.16754800 | -1.01883500 | 0.21343700  |
| O            | -3.24885300 | -1.55837100 | 0.18529400  |
| C            | -0.89298000 | -1.84885700 | -0.03789600 |
| F            | -0.14175300 | -1.85848700 | 1.10531200  |
| F            | -1.24049100 | -3.13856900 | -0.25539300 |
| C            | -0.06295200 | -1.35966300 | -1.22132700 |
| C            | 0.28627300  | 0.10635700  | -1.23878600 |
| H            | -0.64154400 | -1.61831100 | -2.11079000 |
| H            | 0.84178100  | -1.97330400 | -1.21396500 |
| C            | 1.71876700  | 0.49543200  | -1.12284500 |
| H            | 2.27109700  | 0.14453300  | -2.00343700 |
| H            | 1.81599500  | 1.58107600  | -1.06468100 |
| O            | 2.25812100  | -0.11906500 | 0.05258500  |
| C            | 3.55063200  | 0.04074000  | 0.39192000  |
| O            | 3.94477800  | -0.50725300 | 1.38660400  |
| C            | 4.40998200  | 0.89532500  | -0.49043400 |
| H            | 4.45053600  | 0.48256200  | -1.49929700 |
| H            | 4.00305100  | 1.90503500  | -0.55886800 |
| H            | 5.41006600  | 0.93088800  | -0.06978100 |
| H            | 0.09565400  | 0.33722600  | 1.07145900  |
| H            | -0.26912500 | 0.71796600  | -1.94003200 |
|              |             |             |             |
| <b>V</b>     |             |             |             |
| C            | -1.17009500 | 2.84964000  | 0.37536400  |
| C            | -0.22981400 | 3.17181900  | -0.65115700 |
| C            | 0.86062300  | 2.35576800  | -0.88646200 |
| C            | 1.09545200  | 1.22530200  | -0.11458500 |
| C            | 0.25381500  | 0.93911600  | 1.09842700  |
| C            | -0.97176600 | 1.78682100  | 1.18026400  |
| H            | -2.05098100 | 3.46716400  | 0.49594800  |
| H            | -0.40023900 | 4.03714200  | -1.27762200 |
| H            | 1.52639000  | 2.56247000  | -1.71525000 |
| H            | -1.67994300 | 1.54722400  | 1.96401100  |

|            |             |             |             |
|------------|-------------|-------------|-------------|
| O          | 3.02501900  | 0.58736600  | -1.33003600 |
| C          | 1.36784100  | -1.26824700 | 1.37718800  |
| C          | 0.00937200  | -0.57090800 | 1.30848100  |
| C          | -0.90177800 | -1.17941400 | 0.25248700  |
| H          | -0.48147800 | -0.70499100 | 2.27453700  |
| H          | -0.62105200 | -0.85664400 | -0.75151800 |
| H          | -0.85684700 | -2.26968700 | 0.29914400  |
| O          | -2.23364600 | -0.74646000 | 0.54882800  |
| C          | -3.24204600 | -0.95207800 | -0.31467300 |
| O          | -4.33903200 | -0.56709800 | -0.00463500 |
| C          | -2.93242200 | -1.64071100 | -1.60986700 |
| H          | -2.29810000 | -1.00065700 | -2.22600000 |
| H          | -2.39801900 | -2.57564600 | -1.44000100 |
| H          | -3.86484600 | -1.83333500 | -2.13137900 |
| H          | 0.85633900  | 1.23578700  | 1.97845300  |
| H          | 1.94281500  | -0.83760400 | 2.19939800  |
| H          | 1.26638200  | -2.34049800 | 1.55478200  |
| C          | 2.17017000  | 0.33381500  | -0.49852800 |
| C          | 2.17625700  | -1.08024400 | 0.12134300  |
| F          | 3.46233900  | -1.46297500 | 0.33342700  |
| F          | 1.70735000  | -1.91983200 | -0.86314400 |
|            |             |             |             |
| <b>VII</b> |             |             |             |
| C          | -1.37574200 | 2.66340100  | 0.37294000  |
| C          | -0.54506800 | 2.96255700  | -0.69928400 |
| C          | 0.65669500  | 2.25930300  | -0.95590600 |
| C          | 1.01588500  | 1.24569500  | -0.13143400 |
| C          | 0.20581100  | 0.88302600  | 1.04119600  |
| C          | -1.02566400 | 1.64016600  | 1.22009100  |
| H          | -2.28276500 | 3.22821600  | 0.53439600  |
| H          | -0.81987600 | 3.76961100  | -1.36825300 |
| H          | 1.26852200  | 2.52551800  | -1.80761500 |
| H          | -1.63005800 | 1.40556500  | 2.08759800  |
| O          | 3.21996300  | 0.95329600  | -0.95061300 |
| C          | 1.46874800  | -1.28979100 | 1.28654700  |
| C          | 0.08188200  | -0.65146200 | 1.28693900  |
| C          | -0.87470200 | -1.28263300 | 0.28459400  |
| H          | -0.34614100 | -0.77827200 | 2.28179300  |
| H          | -0.55655800 | -1.10727600 | -0.74349300 |
| H          | -0.93027100 | -2.35703500 | 0.46990100  |
| O          | -2.14337500 | -0.67125700 | 0.50839600  |
| C          | -3.20115900 | -0.92167400 | -0.29729000 |
| O          | -4.21663000 | -0.31969400 | -0.08342300 |
| C          | -3.01794000 | -1.92990600 | -1.38774400 |
| H          | -2.28548400 | -1.56725400 | -2.11133400 |
| H          | -2.65050000 | -2.87306400 | -0.98222400 |
| H          | -3.97167000 | -2.08381300 | -1.88255600 |
| H          | 0.80884300  | 1.22821700  | 1.91843600  |

|             |             |             |             |
|-------------|-------------|-------------|-------------|
| H           | 2.04453100  | -0.90176900 | 2.12871000  |
| H           | 1.39601700  | -2.37366500 | 1.39306400  |
| C           | 2.27201600  | 0.47462000  | -0.40015900 |
| C           | 2.26315600  | -1.00641800 | 0.03685800  |
| F           | 3.53538200  | -1.42528600 | 0.17599900  |
| F           | 1.74597800  | -1.69638700 | -1.02682000 |
|             |             |             |             |
| <b>dppm</b> |             |             |             |
| P           | 1.00213800  | 0.71973600  | 0.37380100  |
| C           | 2.78178200  | 1.02931300  | 0.02911200  |
| C           | 3.31291100  | 1.36708400  | -1.21378900 |
| C           | 3.64743700  | 0.94740600  | 1.12466500  |
| C           | 4.67570300  | 1.61103800  | -1.35871200 |
| H           | 2.67592100  | 1.43940600  | -2.08568700 |
| C           | 5.00589400  | 1.17907200  | 0.97911600  |
| H           | 3.24975200  | 0.69572200  | 2.10263600  |
| C           | 5.52522500  | 1.51510500  | -0.26704800 |
| H           | 5.07067800  | 1.87282900  | -2.33265900 |
| H           | 5.66001800  | 1.10540000  | 1.83907100  |
| H           | 6.58514000  | 1.70375100  | -0.38252900 |
| C           | 1.05151600  | -1.09920100 | 0.64616700  |
| C           | 0.23327200  | -1.64095800 | 1.63537500  |
| C           | 1.87005600  | -1.95270000 | -0.09443200 |
| C           | 0.21902300  | -3.01095800 | 1.87260400  |
| H           | -0.39803800 | -0.98730700 | 2.22706200  |
| C           | 1.86130500  | -3.31942300 | 0.14297200  |
| H           | 2.52135600  | -1.54647700 | -0.86102800 |
| C           | 1.03395000  | -3.85122100 | 1.12703800  |
| H           | -0.42610400 | -3.41861500 | 2.64105000  |
| H           | 2.50170600  | -3.97188700 | -0.43793500 |
| H           | 1.02798500  | -4.91832800 | 1.31180300  |
| C           | 0.27722400  | 0.84449100  | -1.32101100 |
| H           | 0.52135800  | 1.84831500  | -1.68269300 |
| H           | 0.74491700  | 0.13854000  | -2.01332900 |
| P           | -1.55696500 | 0.73853900  | -1.58546100 |
| C           | -1.99947600 | -0.93837200 | -0.99737100 |
| C           | -3.13886400 | -1.19377500 | -0.23499500 |
| C           | -1.26529500 | -2.02519400 | -1.48191500 |
| C           | -3.51199300 | -2.49903100 | 0.06755700  |
| H           | -3.74667900 | -0.37444200 | 0.12783800  |
| C           | -1.63678300 | -3.32583600 | -1.18044800 |
| H           | -0.39086000 | -1.85574400 | -2.09972600 |
| C           | -2.76043200 | -3.56840900 | -0.39721000 |
| H           | -4.39615400 | -2.67608200 | 0.66759400  |
| H           | -1.04624600 | -4.15263300 | -1.55588600 |
| H           | -3.04933300 | -4.58414000 | -0.15798300 |
| C           | -2.21595600 | 1.87155700  | -0.30430300 |
| C           | -2.69421300 | 3.10342400  | -0.75061000 |

|            |             |             |             |
|------------|-------------|-------------|-------------|
| C          | -2.23974100 | 1.60104200  | 1.06638300  |
| C          | -3.17368500 | 4.05058800  | 0.14750000  |
| H          | -2.69305900 | 3.32335900  | -1.81233500 |
| C          | -2.72695500 | 2.53965200  | 1.96324900  |
| H          | -1.88008800 | 0.64825500  | 1.43499600  |
| C          | -3.19197000 | 3.76826000  | 1.50526100  |
| H          | -3.53843400 | 5.00281900  | -0.21662600 |
| H          | -2.74043200 | 2.31516500  | 3.02254600  |
| H          | -3.57060200 | 4.50024000  | 2.20777200  |
|            |             |             |             |
| <b>Br-</b> |             |             |             |
| Br         | 0.00000000  | 0.00000000  | 0.00000000  |
|            |             |             |             |
| <b>3aa</b> |             |             |             |
| C          | 0.04825400  | 3.28826300  | -0.30094300 |
| C          | -1.09243700 | 3.35864800  | 0.49529400  |
| C          | -1.82785100 | 2.21426400  | 0.72922900  |
| C          | -1.42605900 | 0.99409900  | 0.17901000  |
| C          | -0.27340400 | 0.91395400  | -0.61520600 |
| C          | 0.45062300  | 2.08094600  | -0.84969200 |
| H          | 0.62541400  | 4.18318300  | -0.49753700 |
| H          | -1.40322600 | 4.30363500  | 0.92102900  |
| H          | -2.72473300 | 2.24215300  | 1.33460100  |
| H          | 1.33713400  | 2.03650600  | -1.46903900 |
| O          | -3.28133100 | -0.17889300 | 1.08992600  |
| C          | -0.94735400 | -1.37906300 | -1.40036200 |
| C          | 0.20793700  | -0.40144200 | -1.18466000 |
| C          | 1.30873400  | -1.00688300 | -0.31084900 |
| H          | 0.66142000  | -0.20847300 | -2.15853600 |
| H          | 1.01626200  | -1.02148500 | 0.73835900  |
| H          | 1.52526300  | -2.02569500 | -0.64061200 |
| O          | 2.46995900  | -0.19088800 | -0.48532700 |
| C          | 3.56169600  | -0.36280600 | 0.27961900  |
| O          | 4.51596400  | 0.33839800  | 0.06865000  |
| C          | 3.51197900  | -1.40988300 | 1.35105500  |
| H          | 2.78871400  | -1.12011900 | 2.11558900  |
| H          | 3.20092300  | -2.37244100 | 0.94486700  |
| H          | 4.49711600  | -1.49522300 | 1.79893000  |
| H          | -1.59878000 | -0.99691800 | -2.18856800 |
| H          | -0.58902500 | -2.36631900 | -1.69679500 |
| C          | -2.26943100 | -0.19286400 | 0.43675300  |
| C          | -1.79307400 | -1.52832600 | -0.16991000 |
| F          | -2.87322900 | -2.30431900 | -0.42368300 |
| F          | -1.09687000 | -2.17581300 | 0.82098400  |
|            |             |             |             |
| <b>H</b>   |             |             |             |
| Br         | 0.00000000  | 0.00000000  | 0.03954600  |
| H          | 0.00000000  | 0.00000000  | -1.38412300 |



|               |             |             |             |
|---------------|-------------|-------------|-------------|
| <b>VI</b>     |             |             |             |
| C             | -4.68065400 | -1.13380400 | -0.65613900 |
| C             | -5.97606800 | -0.78715300 | -0.31788600 |
| C             | -6.20247800 | 0.23285300  | 0.60065500  |
| C             | -5.13195100 | 0.90317600  | 1.17653800  |
| C             | -3.83049900 | 0.56124400  | 0.83896200  |
| C             | -3.59854900 | -0.46290600 | -0.08105100 |
| H             | -4.48954000 | -1.92545700 | -1.36863800 |
| H             | -6.81062200 | -1.30880400 | -0.76804900 |
| H             | -7.21621700 | 0.50484400  | 0.86686000  |
| H             | -5.30825300 | 1.69649700  | 1.89109500  |
| H             | -3.01156800 | 1.09603400  | 1.29760900  |
| C             | -2.23808800 | -0.89539400 | -0.49331400 |
| O             | -2.04429200 | -1.80376100 | -1.26127900 |
| C             | -1.00481400 | -0.15123800 | 0.07881200  |
| C             | 0.30865800  | -0.69081000 | -0.42850400 |
| C             | 1.52899200  | -0.01784100 | 0.18241400  |
| H             | 0.32667300  | -1.75020400 | -0.16240100 |
| H             | 0.32274600  | -0.63149000 | -1.51628600 |
| C             | 2.73499000  | -0.92342000 | 0.06486800  |
| H             | 1.36635800  | 0.23991100  | 1.22699200  |
| H             | 2.49544800  | -1.87426300 | 0.54930300  |
| H             | 2.97069700  | -1.10490900 | -0.98516800 |
| F             | -1.14218500 | 1.17303900  | -0.20238600 |
| F             | -1.04459300 | -0.25186000 | 1.44227400  |
| Br            | 1.92889100  | 1.69155800  | -0.70472500 |
| O             | 3.82242500  | -0.30740800 | 0.74242800  |
| C             | 5.07260500  | -0.79483600 | 0.63732700  |
| O             | 5.94043300  | -0.26146200 | 1.27482000  |
| C             | 5.30090100  | -1.96085000 | -0.27722800 |
| H             | 4.62311500  | -2.78267800 | -0.04508600 |
| H             | 5.12377300  | -1.66021500 | -1.31169900 |
| H             | 6.33041600  | -2.28746000 | -0.16863100 |
|               |             |             |             |
| <b>2FBrPh</b> |             |             |             |
| C             | 2.44035200  | -1.33514900 | -0.00690800 |
| C             | 3.79426200  | -1.05554800 | -0.01549600 |
| C             | 4.22897300  | 0.26591500  | -0.00955000 |
| C             | 3.30758200  | 1.30389400  | 0.00441500  |
| C             | 1.94794800  | 1.03049300  | 0.01180300  |
| C             | 1.50782300  | -0.29424300 | 0.00656600  |
| H             | 2.08783600  | -2.35800500 | -0.01128000 |
| H             | 4.51244200  | -1.86500300 | -0.02693400 |
| H             | 5.28914200  | 0.48577000  | -0.01599000 |
| H             | 3.64594400  | 2.33156700  | 0.00941500  |
| H             | 1.25168100  | 1.85660000  | 0.02268700  |
| C             | 0.07538000  | -0.68519400 | 0.01582100  |

|                    |             |             |             |
|--------------------|-------------|-------------|-------------|
| O                  | -0.30552500 | -1.82132100 | 0.03188000  |
| C                  | -0.97704100 | 0.46786500  | 0.00239100  |
| F                  | -0.80832300 | 1.24792200  | 1.08039600  |
| F                  | -0.79229400 | 1.23850600  | -1.07952900 |
| Br                 | -2.79682800 | -0.18418300 | -0.00842800 |
|                    |             |             |             |
| <b>2FBrPh-dppm</b> |             |             |             |
| P                  | 3.73192800  | 0.67653900  | 0.76671300  |
| C                  | 4.34168700  | 2.39759100  | 0.54987300  |
| C                  | 3.53939000  | 3.50612800  | 0.28822500  |
| C                  | 5.71895600  | 2.59040800  | 0.69922900  |
| C                  | 4.10061300  | 4.77469700  | 0.17263100  |
| H                  | 2.46949900  | 3.39698300  | 0.16658300  |
| C                  | 6.27983300  | 3.85128900  | 0.57326400  |
| H                  | 6.35787900  | 1.73973500  | 0.91418400  |
| C                  | 5.46900900  | 4.95111500  | 0.31106300  |
| H                  | 3.46135500  | 5.62503600  | -0.03087500 |
| H                  | 7.34927000  | 3.97886400  | 0.68685700  |
| H                  | 5.90359300  | 5.93848700  | 0.21881300  |
| C                  | 4.36266100  | -0.07491200 | -0.78923300 |
| C                  | 4.84315700  | -1.38206900 | -0.74412300 |
| C                  | 4.37418200  | 0.60698000  | -2.00642100 |
| C                  | 5.31208900  | -2.00497000 | -1.89541200 |
| H                  | 4.85017000  | -1.91953200 | 0.19767200  |
| C                  | 4.84712800  | -0.00989500 | -3.15535100 |
| H                  | 4.01305700  | 1.62875500  | -2.05681900 |
| C                  | 5.31573600  | -1.31867900 | -3.10169200 |
| H                  | 5.67628300  | -3.02375800 | -1.84722900 |
| H                  | 4.85254900  | 0.53007500  | -4.09429400 |
| H                  | 5.68397800  | -1.79991300 | -3.99930400 |
| C                  | 1.93292800  | 0.87820200  | 0.39824800  |
| H                  | 1.55154000  | 1.60435900  | 1.12331800  |
| H                  | 1.76976000  | 1.30880300  | -0.59406800 |
| P                  | 0.75967200  | -0.54725000 | 0.57447200  |
| C                  | 1.36473700  | -1.79006800 | -0.62476800 |
| C                  | 1.44817500  | -3.14961000 | -0.32654900 |
| C                  | 1.58025500  | -1.38261000 | -1.94514100 |
| C                  | 1.77742600  | -4.07271100 | -1.31365000 |
| H                  | 1.25489800  | -3.50001500 | 0.67948300  |
| C                  | 1.91039500  | -2.30205600 | -2.92770200 |
| H                  | 1.49547100  | -0.33470400 | -2.20989000 |
| C                  | 2.01585100  | -3.65321400 | -2.61402900 |
| H                  | 1.84412200  | -5.12370300 | -1.06043800 |
| H                  | 2.08607300  | -1.96347700 | -3.94145800 |
| H                  | 2.27585000  | -4.37205100 | -3.38087800 |
| C                  | 1.18209700  | -1.23309200 | 2.21928000  |
| C                  | 0.26566100  | -0.99851100 | 3.24419600  |

|    |              |             |             |
|----|--------------|-------------|-------------|
| C  | 2.35209900   | -1.93789400 | 2.51494100  |
| C  | 0.51361600   | -1.44287200 | 4.53827100  |
| H  | -0.65331400  | -0.46510000 | 3.02743100  |
| C  | 2.59759000   | -2.38977800 | 3.80260800  |
| H  | 3.07282200   | -2.14031500 | 1.73228900  |
| C  | 1.67972600   | -2.13968700 | 4.81772500  |
| H  | -0.20800600  | -1.25021100 | 5.32210400  |
| H  | 3.50807700   | -2.93544900 | 4.01700500  |
| H  | 1.87422900   | -2.49261700 | 5.82287500  |
| C  | -7.31607200  | 0.94927400  | -1.23445400 |
| C  | -8.67099300  | 1.15104700  | -1.45213600 |
| C  | -9.59005600  | 0.86325800  | -0.45259900 |
| C  | -9.15741200  | 0.37028600  | 0.77418100  |
| C  | -7.80810700  | 0.16690600  | 0.99737500  |
| C  | -6.87776100  | 0.45474300  | -0.00478000 |
| H  | -6.62076800  | 1.18102000  | -2.02820100 |
| H  | -9.00773900  | 1.53425200  | -2.40637500 |
| H  | -10.64641700 | 1.02303500  | -0.62859400 |
| H  | -9.87347900  | 0.14594200  | 1.55388700  |
| H  | -7.45742000  | -0.21583700 | 1.94666100  |
| C  | -5.44869100  | 0.20682200  | 0.32117700  |
| O  | -5.07505800  | -0.21572700 | 1.37936600  |
| C  | -4.39665500  | 0.52170200  | -0.78493300 |
| F  | -4.67429200  | -0.20210000 | -1.88435100 |
| F  | -4.49198500  | 1.81809900  | -1.13307300 |
| Br | -2.58045300  | 0.15419700  | -0.23492900 |

## 5.5 Another possible reaction mechanism

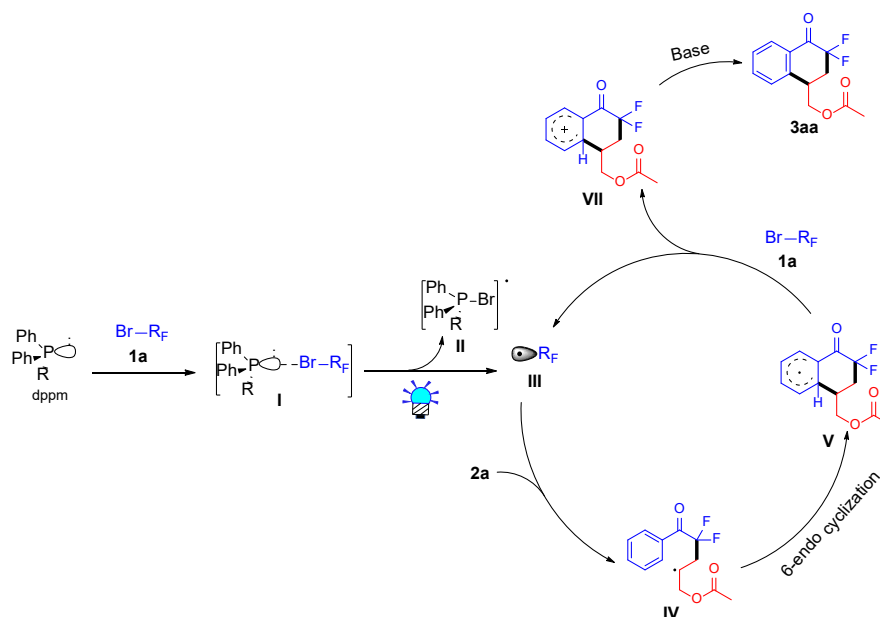

First, an EDA complex I, is assembled from 2-bromo-2,2-difluoro-1-phenyl-ethanone

(**1a**) and phosphine, which then undergoes visible light irradiation to generate a difluoroalkyl radical ( $\bullet\text{CF}_2\text{R}$ ) **III** and the intermediate **II**. Subsequently, the difluoroalkyl radical is captured by alkenes to afford radical addition and migration intermediate **IV**, which is well suited for a 6-endo cyclization to give a stabilized radical adduct **V**. Aryl cation **VII** is then formed through a radical exchange with  $\text{RCF}_2\text{Br}$  (**1a**) to generate a difluoromethyl radical, which then enters the radical chain process. The final product **3aa** is obtained by deprotonation with a base.

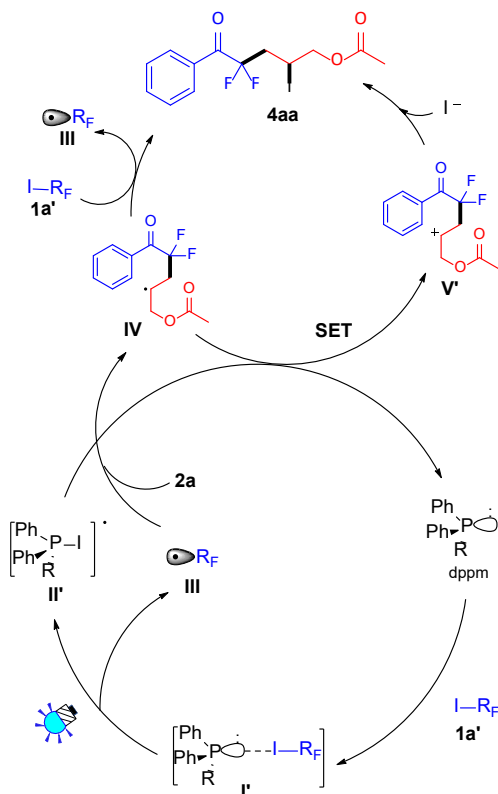

First, an EDA complex **I'**, is assembled from 2,2-difluoro-2-iodo-1-phenylethan-1-one (**1a'**) and phosphine, which then undergoes visible light irradiation to generate a difluoroalkyl radical ( $\bullet\text{CF}_2\text{R}$ ) **III** and the intermediate **II'**. Subsequently, the difluoroalkyl radical is captured by alkenes to afford radical addition and migration intermediate **IV**. The final product **4aa** is then formed through a radical exchange with  $\text{RCF}_2\text{I}$  (**1a'**) to generate a difluoromethyl radical, which then enters the radical chain process. Or the **IV** is a SET oxidation by intermediate **II** to recover the phosphine catalyst to give a stabilized radical adduct **V'**, which is well captures  $\text{I}^-$  to get **4aa**.

## 6 Characterization data of all products

(8R,9S,13S,14S)-13-methyl-17-oxo-7,8,9,11,12,13,14,15,16,17-decahydro-6H-cyclopenta[a]phenanthren-3-yl trifluoromethanesulfonate(2q')

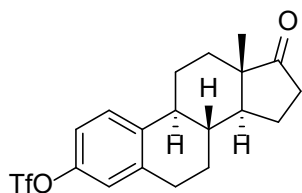

**<sup>1</sup>H NMR** (400 MHz, CDCl<sub>3</sub>) δ = 7.31(d, *J* = 8.0 Hz, 1H), 7.01 - 6.95 (m, 2H), 2.93 - 2.89 (m, 2H), 2.50 - 2.27 (m, 3H), 2.15 - 1.93 (m, 4H), 1.64 - 1.42 (m, 6H), 0.89 (d, *J* = 8.0 Hz, 3H).

**<sup>13</sup>C NMR** (100 MHz, CDCl<sub>3</sub>) δ = 220.3, 174.6, 140.4, 139.4, 127.3, 121.2, 118.8 (q, <sup>1</sup>*J*<sub>C-F</sub> = 636.0, 318.0 Hz), 118.3, 50.4, 47.9, 44.1, 37.8, 35.8, 31.5, 29.4, 26.4 (d, <sup>2</sup>*J*<sub>C-F</sub> = 39.0 Hz), 21.6, 13.8.

**<sup>19</sup>F NMR** (376 MHz, CDCl<sub>3</sub>) δ = -73.07 (s, 3F).

**(8R,9S,13S,14S)-3-allyl-13-methyl-6,7,8,9,11,12,13,14,15,16-decahydro-17H-cyclopenta[a]phenanthren-17-one(2q)**

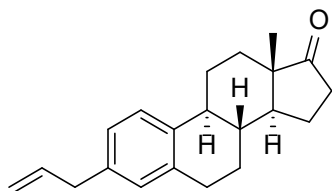

**<sup>1</sup>H NMR** (400 MHz, CDCl<sub>3</sub>) δ = 7.30 (d, *J* = 8.0 Hz, 1H), 7.07 (d, *J* = 8.0 Hz, 1H), 7.02 (s, 1H), 6.09 - 5.99 (m, 1H), 5.16 (t, *J* = 16.0 Hz, 2H), 3.42 (d, *J* = 4.0 Hz, 2H), 2.97 (t, *J* = 4.0 Hz, 2H), 2.61 - 2.48 (m, 2H), 2.39 - 2.32 (m, 1H), 2.26 - 2.03 (m, 4H), 1.75 - 1.49 (m, 6H), 0.98 (s, 3H).

**<sup>13</sup>C NMR** (100 MHz, CDCl<sub>3</sub>) δ = 220.9, 137.7, 137.6, 137.6, 137.6, 136.6, 129.3, 126.1, 125.6, 115.8, 50.6, 48.1, 44.4, 39.9, 38.3, 36.0, 31.7, 29.5, 26.7, 25.9, 21.7.

**(3,3-difluoro-4-oxo-1,2,3,4-tetrahydronaphthalen-1-yl)methyl acetate (3aa)**

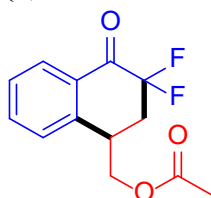

A light yellow oily (81% yield), purified by flash column chromatography on silica gel (petroleum ether/ethyl acetate = 80:1).

**<sup>1</sup>H NMR** (400 MHz, CDCl<sub>3</sub>) δ = 8.14 (d, *J* = 8.0 Hz, 1H), 7.67 (t, *J* = 16.0 Hz, 1H), 7.49 - 7.46 (m, 2H), 4.50 - 4.37 (m, 2H), 3.64 - 3.58 (m, 1H), 2.74 - 2.60 (m, 2H), 2.09 (s, 3H).

**<sup>13</sup>C NMR** (100 MHz, CDCl<sub>3</sub>) δ = 184.8 (t, <sup>2</sup>*J*<sub>C-F</sub> = 26.0 Hz), 170.8, 142.0, 135.5, 130.1, 129.1, 128.4, 128.2, 113.3 (t, <sup>1</sup>*J*<sub>C-F</sub> = 246.0 Hz), 68.08 (d, <sup>4</sup>*J*<sub>C-F</sub> = 2.0 Hz), 35.5 (t, <sup>3</sup>*J*<sub>C-F</sub> = 4.0 Hz), 34.5 (d, <sup>2</sup>*J*<sub>C-F</sub> = 22.0 Hz), 20.82.

**<sup>19</sup>F NMR** (376 MHz, CDCl<sub>3</sub>) δ = -104.87 (ddd, *J* = 274.5, 18.8, 11.3, Hz, 1F), δ = -107.65 (ddd, *J* = 274.5, 18.8, 11.3 Hz, 1F).

**HRMS** (ESI-TOF): *m/z* [M+Na]<sup>+</sup> calcd for C<sub>13</sub>H<sub>12</sub>O<sub>3</sub>F<sub>2</sub>Na: 277.0647; found: 278.0608.  
**(3,3-difluoro-4-oxo-1,2,3,4-tetrahydronaphthalen-1-yl)methyl hexanoate(3ab)**

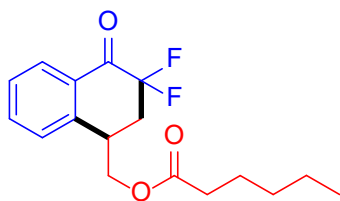

A light yellow oily (65% yield), purified by flash column chromatography on silica gel (petroleum ether/ethyl acetate = 80:1).

**<sup>1</sup>H NMR** (400 MHz, CDCl<sub>3</sub>) δ = 8.10 (d, *J* = 8.0 Hz, 1H), 7.63 (t, *J* = 8.0 Hz, 1H), 7.44 (d, *J* = 8.0 Hz, 2H), 4.41 (t, *J* = 4.0 Hz, 2H), 3.57 (p, *J* = 8.0 Hz, 1H), 2.74 - 2.53 (m, 2H), 2.30 (t, *J* = 8.0 Hz, 2H), 1.58 (p, *J* = 8.0 Hz, 2H), 1.27 - 1.24 (m, 4H), 0.85 (t, *J* = 8.0 Hz, 3H).

**<sup>13</sup>C NMR** (100 MHz, CDCl<sub>3</sub>) δ = 184.8 (t, <sup>2</sup>*J*<sub>C-F</sub> = 26.0 Hz), 173.5, 142.1, 135.4, 130.2, 129.1, 128.3, 128.1, 113.2 (t, <sup>1</sup>*J*<sub>C-F</sub> = 246.0 Hz), 65.83 (d, <sup>2</sup>*J*<sub>C-F</sub> = 3.0 Hz), 35.6 (t, <sup>2</sup>*J*<sub>C-F</sub> = 5.0 Hz), 34.6 (t, <sup>2</sup>*J*<sub>C-F</sub> = 22.0 Hz), 34.1, 31.2, 24.6, 22.3, 13.9.

**<sup>19</sup>F NMR** (376 MHz, CDCl<sub>3</sub>) δ = -105.11 (ddd, *J* = 274.5, 22.6, 11.3 Hz, 1F), -107.68 (ddd, *J* = 274.5, 18.8, 11.3 Hz, 1F).

**HRMS** (ESI-TOF): *m/z* [M+Na]<sup>+</sup> calcd for C<sub>17</sub>H<sub>20</sub>O<sub>3</sub>F<sub>2</sub>Na: 333.1273; found: 333.1278.  
**(3,3-difluoro-4-oxo-1,2,3,4-tetrahydronaphthalen-1-yl)methyl heptanoate(3ac)**

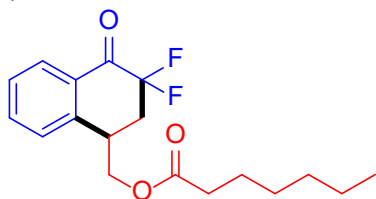

A light yellow oily (72% yield), purified by flash column chromatography on silica gel (petroleum ether/ethyl acetate = 80:1).

**<sup>1</sup>H NMR** (400 MHz, CDCl<sub>3</sub>) δ = 8.13 (d, *J* = 8.0 Hz, 1H), 7.66 (t, *J* = 8.0 Hz, 1H), 7.46 (t, *J* = 8.0 Hz, 2H), 4.45 (s, 2H), 3.61 (s, 1H), 2.77 - 2.59 (m, 2H), 2.33 (t, *J* = 8.0 Hz, 2H), 1.60 (s, 2H), 1.27 (s, 6H), 0.88 (s, 3H).

**<sup>13</sup>C NMR** (100 MHz, CDCl<sub>3</sub>) δ = 184.8 (t, <sup>2</sup>*J*<sub>C-F</sub> = 26.0 Hz), 173.5, 142.1, 135.3, 130.2, 129.0, 128.3, 128.1, 113.2 (t, <sup>1</sup>*J*<sub>C-F</sub> = 246.0 Hz), 65.81 (d, <sup>2</sup>*J*<sub>C-F</sub> = 3.0 Hz), 35.5 (t, <sup>2</sup>*J*<sub>C-F</sub> = 5.0 Hz), 34.6 (t, <sup>2</sup>*J*<sub>C-F</sub> = 22.0 Hz), 34.1, 31.4, 28.7, 24.8, 22.5, 14.0.

**<sup>19</sup>F NMR** (376 MHz, CDCl<sub>3</sub>) δ = -105.10 (ddd, *J* = 274.5, 18.8, 11.3 Hz, 1F), -107.67 (ddd, *J* = 274.5, 18.8, 11.3 Hz, 1F).

**HRMS** (ESI-TOF): *m/z* [M+Na]<sup>+</sup> calcd for C<sub>18</sub>H<sub>22</sub>O<sub>3</sub>F<sub>2</sub>Na: 347.1429; found: 347.1434.  
**(3,3-difluoro-4-oxo-1,2,3,4-tetrahydronaphthalen-1-yl)methyl 3-oxobutanoate (3ad)**

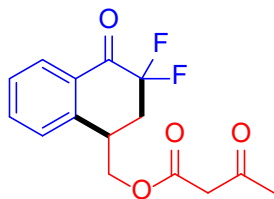

A light yellow oily (35% yield), purified by flash column chromatography on silica gel (petroleum ether/ethyl acetate = 80:1).

**<sup>1</sup>H NMR** (400 MHz, CDCl<sub>3</sub>) δ = 8.15 (d, *J* = 8.0 Hz, 1H), 7.67 (t, *J* = 8.0 Hz, 1H), 7.47

(t,  $J = 8.0$  Hz, 2H), 4.57-4.44 (m, 2H), 3.67-3.61 (m, 1H), 3.52 (s, 2H), 2.75-2.63 (m, 2H), 2.25 (s, 3H).

$^{13}\text{C}$  NMR (100 MHz,  $\text{CDCl}_3$ )  $\delta = 185.5$  (t,  $^2J_{\text{C-F}} = 26.0$  Hz), 166.1, 147.0, 135.1, 129.7, 128.6, 128.4, 128.0, 127.4, 113.6 (t,  $^1J_{\text{C-F}} = 246.0$  Hz), 37.4 (d,  $^2J_{\text{C-F}} = 2.0$  Hz), 36.1 (t,  $^2J_{\text{C-F}} = 20.0$  Hz), 35.4 (t,  $^2J_{\text{C-F}} = 1.0$  Hz), 19.77, 13.92.

$^{19}\text{F}$  NMR (376 MHz,  $\text{CDCl}_3$ )  $\delta = -104.82$  (d,  $J = 274.5$  Hz, 1F),  $-106.37$  (d,  $J = 274.5$  Hz, 1F).

HRMS (ESI-TOF):  $m/z$   $[\text{M}+\text{Na}]^+$  calcd for  $\text{C}_{15}\text{H}_{14}\text{O}_4\text{F}_2\text{Na}$ : 319.0954; found: 319.1012.

### 3,3-difluoro-4-oxo-1,2,3,4-tetrahydronaphthalen-1-yl acetate(3ae)

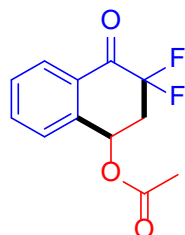

A light yellow oily (60% yield), purified by flash column chromatography on silica gel (petroleum ether/ethyl acetate = 80:1).

$^1\text{H}$  NMR (400 MHz,  $\text{CDCl}_3$ )  $\delta = 8.14$  (d,  $J = 8.0$  Hz, 1H), 7.72 (t,  $J = 8.0$  Hz, 1H), 7.55 (t,  $J = 8.0$  Hz, 1H), 7.48 (d,  $J = 8.0$  Hz, 1H), 6.30 (q,  $J = 4.0$  Hz, 1H), 3.07 - 2.95 (m, 1H), 2.75 - 2.62 (m, 1H), 2.20 (s, 3H).

$^{13}\text{C}$  NMR (100 MHz,  $\text{CDCl}_3$ )  $\delta = 184.2$  (t,  $^2J_{\text{C-F}} = 26.0$  Hz), 170.2, 140.6, 135.7, 129.6, 129.2, 128.6, 127.9, 132.2 (t,  $^1J_{\text{C-F}} = 246.0$  Hz), 66.2 (t,  $^2J_{\text{C-F}} = 5.0$  Hz), 38.0 (t,  $^2J_{\text{C-F}} = 22.0$  Hz), 21.0.

$^{19}\text{F}$  NMR (376 MHz,  $\text{CDCl}_3$ )  $\delta = -105.36$  (ddd,  $J = 282.0, 18.8, 11.3$  Hz, 1F),  $-107.48$  (ddd,  $J = 274.5, 22.6, 11.3$  Hz, 1F).

HRMS (ESI-TOF):  $m/z$   $[\text{M}+\text{Na}]^+$  calcd for  $\text{C}_{12}\text{H}_{10}\text{O}_3\text{F}_2\text{Na}$ : 263.0490; found: 263.0495.

### 4,4-difluoro-9b-methyl-3a,9b-dihydronaphtho[1,2-b]furan-2,5(3H,4H)-dione (3af)

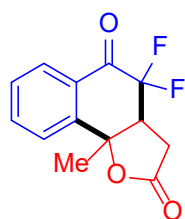

A light yellow oily (50% yield), purified by flash column chromatography on silica gel (petroleum ether/ethyl acetate = 80:1).

$^1\text{H}$  NMR (400 MHz,  $\text{CDCl}_3$ )  $\delta = 8.11$  (d,  $J = 8.0$  Hz, 1H), 7.82 (t,  $J = 8.0$  Hz, 1H), 7.74 (d,  $J = 8.0$  Hz, 1H), 7.59 (t,  $J = 8.0$  Hz, 1H), 3.57 - 3.46 (m, 1H), 2.89 (q,  $J = 8.0$  Hz, 1H), 2.49 (q,  $J = 12.0$  Hz, 1H), 1.97 (s, 3H).

$^{13}\text{C}$  NMR (100 MHz,  $\text{CDCl}_3$ )  $\delta = 183.1$  (t,  $^2J_{\text{C-F}} = 26.0$  Hz), 171.8, 142.0, 136.8, 130.2, 128.8, 127.9, 127.3, 112.3 (t,  $^1J_{\text{C-F}} = 246.0$  Hz), 49.1 (t,  $^2J_{\text{C-F}} = 24.0$  Hz), 30.8 (d,  $^2J_{\text{C-F}} = 6.0$  Hz), 29.6.

$^{19}\text{F}$  NMR (376 MHz,  $\text{CDCl}_3$ )  $\delta = -99.31$  (dd,  $J = 282.0, 11.3$  Hz, 1F),  $-113.07$  (dd,  $J = 282.0, 7.5$  Hz, 1F).

HRMS (ESI-TOF):  $m/z$   $[\text{M}+\text{Na}]^+$  calcd for  $\text{C}_{13}\text{H}_{10}\text{O}_3\text{F}_2\text{Na}$ : 275.0490; found: 275.0496.

#### 4,4-difluoro-1,3a,4,9b-tetrahydronaphtho[1,2-c]furan-5(3H)-one (3ag)

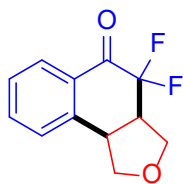

A light yellow oily (65% yield), purified by flash column chromatography on silica gel (petroleum ether/ethyl acetate = 80:1).

**<sup>1</sup>H NMR** (400 MHz, CDCl<sub>3</sub>) δ = 8.02 (d, *J* = 8.0 Hz, 1H), 7.67 (t, *J* = 8.0 Hz, 1H), 7.44 (t, *J* = 8.0 Hz, 1H), 7.33 (d, *J* = 8.0 Hz, 1H), 4.28 - 4.24 (m, 1H), 4.16 (t, *J* = 8.0 Hz, 1H), 4.06 (q, *J* = 4.0 Hz, 1H), 3.94 - 3.88 (m, 2H), 3.45 - 3.33 (m, 1H).

**<sup>13</sup>C NMR** (100 MHz, CDCl<sub>3</sub>) δ = 185.2 (t, <sup>2</sup>*J*<sub>C-F</sub> = 26.0 Hz), 141.5, 135.7, 130.2, 129.0, 128.3, 128.1, 113.7 (t, <sup>1</sup>*J*<sub>C-F</sub> = 246.0 Hz), 75.1, 66.5 (t, <sup>2</sup>*J*<sub>C-F</sub> = 4.0 Hz), 44.9 (t, <sup>2</sup>*J*<sub>C-F</sub> = 22.0 Hz), 42.2 (t, <sup>2</sup>*J*<sub>C-F</sub> = 4.0 Hz).

**<sup>19</sup>F NMR** (376 MHz, CDCl<sub>3</sub>) δ = -104.20 (dd, *J* = 282.0, 11.3 Hz, 1F), -113.4 (dd, *J* = 282.0, 11.3 Hz, 1F).

**HRMS** (ESI-TOF): *m/z* [M+Na]<sup>+</sup> calcd for C<sub>12</sub>H<sub>10</sub>O<sub>2</sub>F<sub>2</sub>Na: 247.0541; found: 247.0546.

#### 4,4-difluoro-1,2,3,3a,4,9b-hexahydro-5H-cyclopenta[a]naphthalen-5-one (3ah)

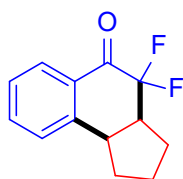

A light yellow oily (40% yield), purified by flash column chromatography on silica gel (petroleum ether/ethyl acetate = 80:1).

**<sup>1</sup>H NMR** (400 MHz, CDCl<sub>3</sub>) δ = 8.0 (d, *J* = 8.0 Hz, 1H), 7.62 (t, *J* = 8.0 Hz, 1H), 7.37 (t, *J* = 8.0 Hz, 2H), 3.62 (q, *J* = 8.0 Hz, 1H), 3.07 - 2.94 (m, 1H), 2.28 - 2.19 (m, 1H), 2.08 - 1.91 (m, 2H), 1.88 - 1.81 (m, 1H), 1.78 - 1.70 (m, 2H).

**<sup>13</sup>C NMR** (100 MHz, CDCl<sub>3</sub>) δ = 186.3 (t, <sup>2</sup>*J*<sub>C-F</sub> = 45.0 Hz), 144.8, 138.4, 133.6, 130.4 (t, <sup>2</sup>*J*<sub>C-F</sub> = 49.0 Hz), 128.9, 125.9, 113.7 (t, <sup>1</sup>*J*<sub>C-F</sub> = 246.0 Hz), 44.91 (t, <sup>2</sup>*J*<sub>C-F</sub> = 21.0 Hz), 42.4, 35.0, 24.4, 24.1.

**<sup>19</sup>F NMR** (376 MHz, CDCl<sub>3</sub>) δ = -106.19 (dd, *J* = 267.0, 11.3 Hz, 1F), -113.81 (dd, *J* = 267.0, 11.3 Hz, 1F).

**HRMS** (ESI-TOF): *m/z* [M+Na]<sup>+</sup> calcd for C<sub>13</sub>H<sub>12</sub>OF<sub>2</sub>Na: 245.0754; found: 245.0752.

#### 10,10-difluoro-2,3,4,4a,10,10a-hexahydrophenanthren-9(1H)-one (3ai)

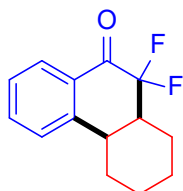

A light yellow oily (63% yield), purified by flash column chromatography on silica gel (petroleum ether/ethyl acetate = 80:1).

**<sup>1</sup>H NMR** (400 MHz, CDCl<sub>3</sub>) δ = 8.12 - 8.10 (m, 1H), 7.66 - 7.62 (m, 1H), 7.42 - 7.36 (m, 2H), 3.50 - 3.46 (m, 1H), 2.75 - 2.59 (m, 1H), 2.40 - 2.36 (m, 1H), 1.71 - 1.68 (m,



2H), 1.58 - 1.51 (m, 1H), 1.47 - 1.41 (m, 2H), 1.37 - 1.27 (m, 2H).

$^{13}\text{C}$  NMR (100 MHz,  $\text{CDCl}_3$ )  $\delta$  = 185.7 (t,  $^2J_{\text{C-F}}$  = 26.0 Hz), 135.5, 133.3, 129.8, 128.5, 127.6, 127.2, 115.5 (t,  $^1J_{\text{C-F}}$  = 248.0 Hz), 64.5, 47.7, 29.0, 24.2, 21.7, 21.6 (t,  $^2J_{\text{C-F}}$  = 4.0 Hz).

$^{19}\text{F}$  NMR (376 MHz,  $\text{CDCl}_3$ )  $\delta$  = -120.76 (d,  $J$  = 270.7 Hz, 1F), -122.59 (d,  $J$  = 2667.0 Hz, 1F).

HRMS (ESI-TOF):  $m/z$   $[\text{M}+\text{Na}]^+$  calcd for  $\text{C}_{14}\text{H}_{14}\text{OF}_2\text{Na}$ : 259.0905; found: 259.0911.

**6,6-difluoro-6a,7,8,9,10,11,12,12a-octahydrocycloocta[a]naphthalen-5(6H)-one (3aj)**

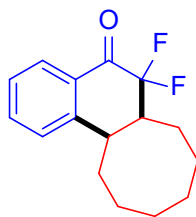

A light yellow oily (70% yield), purified by flash column chromatography on silica gel (petroleum ether/ethyl acetate = 80:1).

$^1\text{H}$  NMR (400 MHz,  $\text{CDCl}_3$ )  $\delta$  = 8.11- 8.08 (m, 1H), 7.63 - 7.58 (m, 1H), 7.40 - 7.36 (m, 2H), 3.25 - 3.19 (m, 1H), 2.68 - 2.55 (m, 1H), 2.47 - 2.34 (m, 1H), 1.90 - 1.81 (m, 1H), 1.77 - 1.63 (m, 2H), 1.50 - 1.39 (m, 1H), 1.35 - 1.22 (m, 5H), 0.89 - 0.85 (m, 2H).

$^{13}\text{C}$  NMR (100 MHz,  $\text{CDCl}_3$ )  $\delta$  = 185.5 (t,  $^2J_{\text{C-F}}$  = 26.0 Hz), 147.1, 135.1, 128.7, 128.0, 127.4, 127.2, 113.6 (t,  $^1J_{\text{C-F}}$  = 246.0 Hz), 36.1 (t,  $^2J_{\text{C-F}}$  = 21.0 Hz), 35.6 (t,  $^2J_{\text{C-F}}$  = 5.0 Hz), 31.7, 29.2, 26.5, 22.6.

$^{19}\text{F}$  NMR (376 MHz,  $\text{CDCl}_3$ )  $\delta$  = -104.78 (ddd,  $J$  = 278.2, 22.6, 15.0 Hz, 1F), -106.25 (ddd,  $J$  = 274.5, 18.8, 11.3 Hz, 1F).

HRMS (ESI-TOF):  $m/z$   $[\text{M}+\text{Na}]^+$  calcd for  $\text{C}_{16}\text{H}_{18}\text{OF}_2\text{Na}$ : 287.1218; found: 287.1215.

**2,2-difluoro-4-(phenoxyethyl)-3,4-dihydronaphthalen-1(2H)-one(3ak)**

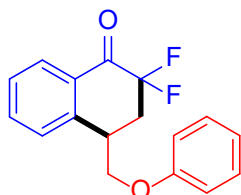

A light yellow oily (58% yield), purified by flash column chromatography on silica gel (petroleum ether/ethyl acetate = 80:1).

$^1\text{H}$  NMR (400 MHz,  $\text{CDCl}_3$ )  $\delta$  = 8.13 (d,  $J$  = 8.0 Hz, 1H), 7.62 (t,  $J$  = 8.0 Hz, 1H), 7.51 (d,  $J$  = 8.0 Hz, 1H), 7.42 (t,  $J$  = 8.0 Hz, 1H), 7.27 (t,  $J$  = 8.0 Hz, 2H), 6.95 (t,  $J$  = 4.0 Hz, 1H), 6.90 (d,  $J$  = 8.0 Hz, 2H), 4.31 - 4.21 (m, 2H), 3.69 (s, 1H), 2.81 - 2.66 (m, 2H).

$^{13}\text{C}$  NMR (100 MHz,  $\text{CDCl}_3$ )  $\delta$  = 185.1 (t,  $^2J_{\text{C-F}}$  = 26.0 Hz), 158.4, 142.8, 135.4, 130.4, 130.2, 129.7, 129.1, 129.0, 128.5, 128.3, 121.5, 114.7, 113.6 (t,  $^1J_{\text{C-F}}$  = 246.0 Hz), 70.15 (d,  $^2J_{\text{C-F}}$  = 3.0 Hz), 36.3 (t,  $^2J_{\text{C-F}}$  = 5.0 Hz), 34.6 (t,  $^2J_{\text{C-F}}$  = 22.0 Hz).

$^{19}\text{F}$  NMR (376 MHz,  $\text{CDCl}_3$ )  $\delta$  = -104.54 (ddd,  $J$  = 274.5, 22.6, 11.3 Hz, 1F), -107.38 (ddd,  $J$  = 274.5, 22.6, 11.3 Hz, 1F).

**HRMS (ESI-TOF):**  $m/z$   $[M+Na]^+$  calcd for  $C_{17}H_{14}O_2F_2Na$ : 311.0854; found: 311.0859.

**4-(butoxymethyl)-2,2-difluoro-3,4-dihydronaphthalen-1(2H)-one(3al)**

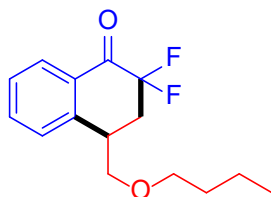

A light yellow oily (77% yield), purified by flash column chromatography on silica gel (petroleum ether/ethyl acetate = 80:1).

**$^1H$  NMR** (400 MHz,  $CDCl_3$ )  $\delta$  = 8.12 (d,  $J$  = 8.0 Hz, 1H), 7.63 (t,  $J$  = 8.0 Hz, 1H), 7.50 (t,  $J$  = 8.0 Hz, 1H), 7.42 (t,  $J$  = 8.0 Hz, 1H), 3.73 (s, 2H), 3.49 (s, 3H), 2.66 (t,  $J$  = 8.0 Hz, 2H), 1.57 (s, 2H), 1.37 (d,  $J$  = 8.0 Hz, 2H), 0.92 (s, 3H).

**$^{13}C$  NMR** (100 MHz,  $CDCl_3$ )  $\delta$  = 185.4 (t,  $^2J_{C-F}$  = 26.0 Hz), 143.7, 135.1, 130.2, 128.8, 128.4, 127.9, 113.2 (t,  $^1J_{C-F}$  = 246.0 Hz), 73.4, 71.2, 36.6 (t,  $^2J_{C-F}$  = 5.0 Hz), 34.6 (t,  $^2J_{C-F}$  = 22.0 Hz), 31.7, 19.4, 13.9.

**$^{19}F$  NMR** (376 MHz,  $CDCl_3$ )  $\delta$  = -104.95 (dt,  $J$  = 274.5, 15.0 Hz, 1F), -107.40 (dt,  $J$  = 274.5, 15.0 Hz, 1F).

**HRMS (ESI-TOF):**  $m/z$   $[M+Na]^+$  calcd for  $C_{15}H_{18}O_2F_2Na$ : 291.1167; found: 291.1172.

**4-benzyl-2,2-difluoro-3,4-dihydronaphthalen-1(2H)-one(3am)**

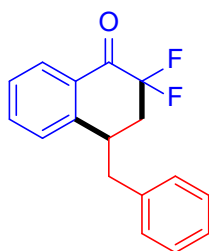

A light yellow oily (53% yield), purified by flash column chromatography on silica gel (petroleum ether/ethyl acetate = 80:1).

**$^1H$  NMR** (400 MHz,  $CDCl_3$ )  $\delta$  = 8.10 (d,  $J$  = 8.0 Hz, 1H), 7.59 (t,  $J$  = 8.0 Hz, 1H), 7.38 (d,  $J$  = 4.0 Hz, 2H), 7.31 (t,  $J$  = 8.0 Hz, 2H), 7.25 (d,  $J$  = 4.0 Hz, 1H), 7.20 (d,  $J$  = 8.0 Hz, 2H), 3.47 (s, 1H), 3.27 (d,  $J$  = 12.0 Hz, 1H), 2.85 (t,  $J$  = 12.0 Hz, 1H), 2.46 - 2.27 (m, 2H).

**$^{13}C$  NMR** (100 MHz,  $CDCl_3$ )  $\delta$  = 185.4 (t,  $^2J_{C-F}$  = 26.0 Hz), 146.2, 138.7, 135.4, 129.6, 129.4, 129.0, 128.9, 128.5, 127.9, 126.9, 113.8 (t,  $^1J_{C-F}$  = 246.0 Hz), 42.23 (d,  $^2J_{C-F}$  = 3.0 Hz), 38.02 (q,  $^2J_{C-F}$  = 3.0 Hz), 35.4 (t,  $^2J_{C-F}$  = 22.0 Hz).

**$^{19}F$  NMR** (376 MHz,  $CDCl_3$ )  $\delta$  = -102.80 (ddd,  $J$  = 278.2, 22.6, 11.3 Hz, 1F), -106.38 (ddd,  $J$  = 278.2, 18.8, 11.3 Hz, 1F).

**HRMS (ESI-TOF):**  $m/z$   $[M+Na]^+$  calcd for  $C_{17}H_{14}OF_2Na$ : 295.0905; found: 295.0909.

**2,2-difluoro-4-((trimethylsilyl)methyl)-3,4-dihydronaphthalen-1(2H)-one(3an)**

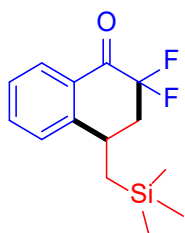

A light yellow oily (94% yield), purified by flash column chromatography on silica gel (petroleum ether/ethyl acetate = 80:1).

**<sup>1</sup>H NMR** (400 MHz, CDCl<sub>3</sub>) δ = 8.31 (t, *J* = 8.0 Hz, 1H), 7.88 - 7.83 (m, 1H), 7.67 (q, *J* = 4.0 Hz, 1H), 7.63 - 7.58 (m, 1H), 3.62 (s, 1H), 2.98 - 2.85 (m, 1H), 2.65 - 2.50 (m, 1H), 1.52 (d, *J* = 16.0 Hz, 1H), 1.30 (t, *J* = 12.0 Hz, 1H), 0.37 (d, *J* = 4.0 Hz, 9H).

**<sup>13</sup>C NMR** (100 MHz, CDCl<sub>3</sub>) δ = 185.5 (t, <sup>2</sup>*J*<sub>C-F</sub> = 26.0 Hz), 149.4, 135.4, 129.3, 128.6, 128.0, 127.3, 113.5 (t, <sup>1</sup>*J*<sub>C-F</sub> = 246.0 Hz), 64.5, 44.8, 39.1 (t, <sup>2</sup>*J*<sub>C-F</sub> = 22.0 Hz), 32.4 (t, <sup>2</sup>*J*<sub>C-F</sub> = 5.0 Hz), 24.1, 0.55.

**<sup>19</sup>F NMR** (376 MHz, CDCl<sub>3</sub>) δ = -105.41 (ddd, *J* = 274.5, 18.8, 11.3 Hz, 1F), -106.34 (ddd, *J* = 278.2, 26.3, 11.3 Hz, 1F).

**HRMS** (ESI-TOF): *m/z* [M+Na]<sup>+</sup> calcd for C<sub>14</sub>H<sub>18</sub>OF<sub>2</sub>SiNa: 291.0987; found: 291.0992.

#### 4-butyl-2,2-difluoro-3,4-dihydronaphthalen-1(2H)-one(3ao)

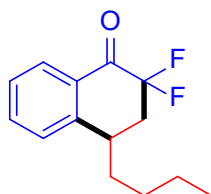

A light yellow oily (83% yield), purified by flash column chromatography on silica gel (petroleum ether/ethyl acetate = 80:1).

**<sup>1</sup>H NMR** (400 MHz, CDCl<sub>3</sub>) δ = 8.10 (t, *J* = 8.0 Hz, 1H), 7.62 (t, *J* = 8.0 Hz, 1H), 7.44 - 7.36 (m, 2H), 3.23 (m, 1H), 2.71 - 2.56 (m, 1H), 2.49 - 2.36 (m, 1H), 1.88 (s, 1H), 1.79 (s, 1H), 1.38 (t, *J* = 8.0 Hz, 4H), 0.94 (d, *J* = 8.0 Hz, 3H).

**<sup>13</sup>C NMR** (100 MHz, CDCl<sub>3</sub>) δ = 185.6 (t, <sup>2</sup>*J*<sub>C-F</sub> = 26.0 Hz), 148.7, 135.2, 129.8, 128.8, 128.0, 127.4, 113.7 (t, <sup>1</sup>*J*<sub>C-F</sub> = 246.0 Hz), 36.2 (t, <sup>2</sup>*J*<sub>C-F</sub> = 22.0 Hz), 35.6, 35.0, 28.8, 22.7, 14.0.

**<sup>19</sup>F NMR** (376 MHz, CDCl<sub>3</sub>) δ = -104.97 (ddd, *J* = 274.5, 22.6, 11.3 Hz, 1F), -106.43 (ddd, *J* = 278.2, 18.8, 11.3 Hz, 1F).

**HRMS** (ESI-TOF): *m/z* [M+Na]<sup>+</sup> calcd for C<sub>14</sub>H<sub>16</sub>OF<sub>2</sub>Na: 261.1061; found: 261.1067.

#### 2,2-difluoro-4-hexyl-3,4-dihydronaphthalen-1(2H)-one(3ap)

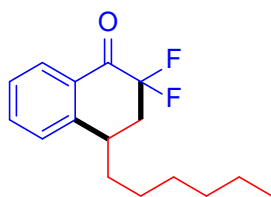

A light yellow oily (80% yield), purified by flash column chromatography on silica gel (petroleum ether/ethyl acetate = 80:1).

**<sup>1</sup>H NMR** (400 MHz, CDCl<sub>3</sub>) δ = 8.09 (d, *J* = 8.0 Hz, 1H), 7.62 (t, *J* = 8.0 Hz, 1H), 7.42

(q,  $J = 8.0$  Hz, 2H), 3.24 (m, 1H), 2.69 - 2.56 (m, 1H), 2.49 - 2.36 (m, 1H), 1.91 - 1.72 (m, 2H), 1.36 - 1.32 (d,  $J = 16.0$  Hz, 8H), 0.89 (s, 3H).

$^{13}\text{C}$  NMR (100 MHz,  $\text{CDCl}_3$ )  $\delta = 185.6$  (t,  $^2J_{\text{C-F}} = 26.0$  Hz), 147.1, 135.2, 129.7, 128.8, 128.0, 127.4, 113.7 (t,  $^1J_{\text{C-F}} = 246.0$  Hz), 36.2 (t,  $^2J_{\text{C-F}} = 21.0$  Hz), 35.7 (t,  $^2J_{\text{C-F}} = 4.0$  Hz), 35.3, 31.2, 29.3, 26.6, 22.7, 14.1.

$^{19}\text{F}$  NMR (376 MHz,  $\text{CDCl}_3$ )  $\delta = -104.95$  (ddd,  $J = 274.5, 18.8, 11.3$  Hz, 1F),  $-106.42$  (ddd,  $J = 274.5, 15.0, 11.3$  Hz, 1F).

**HRMS** (ESI-TOF):  $m/z$   $[\text{M}+\text{Na}]^+$  calcd for  $\text{C}_{16}\text{H}_{20}\text{OF}_2\text{Na}$ : 289.1380; found: 289.1379.  
**(8R,9S,13S,14S)-3-((3,3-difluoro-4-oxo-1,2,3,4-tetrahydronaphthalen-1-yl)methyl)-13-methyl-6,7,8,9,11,12,13,14,15,16-decahydro-17H-cyclopenta[a]phenanthren-17-one(3aq)**

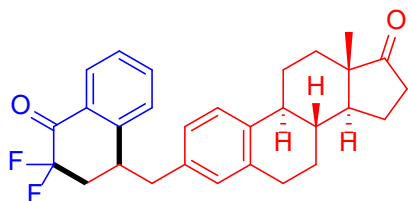

A white solid (55% yield), purified by flash column chromatography on silica gel (petroleum ether/ethyl acetate = 80:1). m. p. (174.2 °C-176.3°C)

$^1\text{H}$  NMR (400 MHz,  $\text{CDCl}_3$ )  $\delta = 8.03$  (d,  $J = 8.0$  Hz, 1H), 7.80 - 7.71 (m, 2H), 7.54 (t,  $J = 8.0$  Hz, 1H), 7.27 (d,  $J = 8.0$  Hz, 1H), 7.09 - 7.05 (m, 2H), 2.87 (s, 2H), 2.71 (t,  $J = 6.0$  Hz, 1H), 2.52 (s, 3H), 2.45 - 2.39 (m, 2H), 2.27 (t,  $J = 8.0$  Hz, 1H), 2.11 - 1.96 (m, 2H), 1.80 (d,  $J = 6.0$  Hz, 1H), 1.62 - 1.37 (m, 6H), 1.22 (d,  $J = 10.0$  Hz, 2H), 0.86 (s, 3H).

$^{13}\text{C}$  NMR (100 MHz,  $\text{CDCl}_3$ )  $\delta = 220.3, 185.3, 147.0, 138.3, 136.8, 135.4, 136.2, 130.1, 129.5, 129.3, 128.4, 127.2, 125.9, 114.7, 50.2, 47.9, 44.3, 41.2, 38.2, 37.3, 35.9, 31.2, 29.4, 26.6, 25.8, 21.7$ .

$^{19}\text{F}$  NMR (376 MHz,  $\text{CDCl}_3$ )  $\delta = -102.63$  (dd,  $J = 270.7, 26.3$  Hz, 1F),  $-105.56$  (d,  $J = 270.7$  Hz, 1F).

**HRMS** (ESI-TOF):  $m/z$   $[\text{M}+\text{H}]^+$  calcd for  $\text{C}_{29}\text{H}_{30}\text{O}_2\text{F}_2$ : 449.2292; found: 449.2289.

**(3,3-difluoro-7-methoxy-4-oxo-1,2,3,4-tetrahydronaphthalen-1-yl)methyl acetate (3ba)**

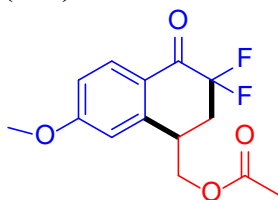

A light yellow oily (67% yield), purified by flash column chromatography on silica gel (petroleum ether/ethyl acetate = 80:1).

$^1\text{H}$  NMR (400 MHz,  $\text{CDCl}_3$ )  $\delta = 8.05 - 8.02$  (m, 1H), 6.90 - 6.87 (m, 1H), 6.80 (t,  $J = 4.0$  Hz, 1H), 4.39 - 4.27 (m, 2H), 3.82 (s, 3H), 3.48 - 3.42 (m, 1H), 2.63 - 2.49 (m, 2H), 2.02 (s, 3H).

$^{13}\text{C}$  NMR (100 MHz,  $\text{CDCl}_3$ )  $\delta = 183.4$  (t,  $^2J_{\text{C-F}} = 24.0$  Hz), 170.8, 165.3, 144.6, 131.8, 123.4, 114.6, 113.2 (t,  $^1J_{\text{C-F}} = 253.0$  Hz), 112.7, 66.1 (d,  $^4J_{\text{C-F}} = 3.0$  Hz), 55.8, 35.7 (t,

$^3J_{\text{C-F}} = 5.0$  Hz), 34.6 (t,  $^2J_{\text{C-F}} = 23.0$  Hz), 20.9.

$^{19}\text{F}$  NMR (376 MHz,  $\text{CDCl}_3$ )  $\delta = -104.43$  (ddd,  $J = 274.5, 18.8, 11.3$  Hz, 1F),  $-107.25$  (ddd,  $J = 274.5, 18.8, 11.3$  Hz, 1F).

HRMS (ESI-TOF):  $m/z$   $[\text{M}+\text{Na}]^+$  calcd for  $\text{C}_{14}\text{H}_{14}\text{O}_4\text{F}_2\text{Na}$ : 307.0752; found: 307.0757.

**(3,3-difluoro-7-methyl-4-oxo-1,2,3,4-tetrahydronaphthalen-1-yl)methyl acetate(3ca)**

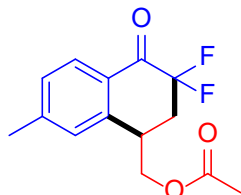

A light yellow oily (77% yield), purified by flash column chromatography on silica gel (petroleum ether/ethyl acetate = 80:1).

$^1\text{H}$  NMR (400 MHz,  $\text{CDCl}_3$ )  $\delta = 8.04$  (d,  $J = 8.0$  Hz, 1H), 7.26 (t,  $J = 8.0$  Hz, 2H), 4.52 - 4.48 (m, 1H), 4.36 - 4.30 (m, 1H), 3.54 (q,  $J = 8.0$  Hz, 1H), 2.74 - 2.57 (m, 2H), 2.44 (s, 3H), 2.10 (s, 3H).

$^{13}\text{C}$  NMR (100 MHz,  $\text{CDCl}_3$ )  $\delta = 184.4$  (t,  $^2J_{\text{C-F}} = 26.0$  Hz), 170.7, 146.9, 142.0, 129.4, 129.1, 128.7, 127.7, 113.3 (t,  $^1J_{\text{C-F}} = 246.0$  Hz), 66.1, 35.4, 34.3 (t,  $^2J_{\text{C-F}} = 23.0$  Hz), 22.0, 20.7.

$^{19}\text{F}$  NMR (376 MHz,  $\text{CDCl}_3$ )  $\delta = -104.43$  (ddd,  $J = 267.0, 22.6, 11.3$  Hz, 1F),  $-107.38$  (ddd,  $J = 228.2, 22.6, 11.3$  Hz, 1F).

HRMS (ESI-TOF):  $m/z$   $[\text{M}+\text{Na}]^+$  calcd for  $\text{C}_{14}\text{H}_{14}\text{O}_3\text{F}_2\text{Na}$ : 291.0803; found: 291.0809.

**(3,3-difluoro-4-oxo-7-(trifluoromethyl)-1,2,3,4-tetrahydronaphthalen-1-yl)methyl acetate(3da)**

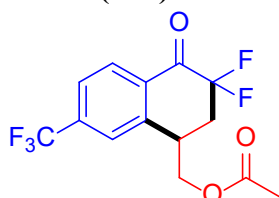

A light yellow oily (70% yield), purified by flash column chromatography on silica gel (petroleum ether/ethyl acetate = 80:1).

$^1\text{H}$  NMR (400 MHz,  $\text{CDCl}_3$ )  $\delta = 8.17$  (d,  $J = 8.0$  Hz, 1H), 7.67 - 7.63 (m, 2H), 4.43 - 4.32 (m, 2H), 3.62 - 3.56 (m, 1H), 2.74 - 2.52 (m, 2H), 2.01 (s, 3H).

$^{13}\text{C}$  NMR (100 MHz,  $\text{CDCl}_3$ )  $\delta = 184.0$  (t,  $^2J_{\text{C-F}} = 26.0$  Hz), 170.6, 142.8, 136.1 (q,  $^2J_{\text{C-F}} = 33.0$  Hz), 132.6, 129.8, 125.5 (d,  $^2J_{\text{C-F}} = 4.0$  Hz), 125.1 (d,  $^2J_{\text{C-F}} = 4.0$  Hz), 122.5 (q,  $^1J_{\text{C-F}} = 273.0$  Hz), 112.9 (t,  $^1J_{\text{C-F}} = 246.0$  Hz), 65.8 (d,  $^4J_{\text{C-F}} = 3.0$  Hz), 35.6 (t,  $^3J_{\text{C-F}} = 5.0$  Hz), 34.4 (t,  $^2J_{\text{C-F}} = 23.0$  Hz), 20.7.

$^{19}\text{F}$  NMR (376 MHz,  $\text{CDCl}_3$ )  $\delta = -63.52$  (s, 3F),  $-105.09$  (ddd,  $J = 274.5, 18.8, 11.3$  Hz, 1F),  $-108.04$  (ddd,  $J = 274.5, 18.8, 11.3$  Hz, 1F).

HRMS (ESI-TOF):  $m/z$   $[\text{M}+\text{Na}]^+$  calcd for  $\text{C}_{14}\text{H}_{11}\text{O}_3\text{F}_5\text{Na}$ : 345.0526; found: 345.0527.

**(3,3,7-trifluoro-4-oxo-1,2,3,4-tetrahydronaphthalen-1-yl)methyl acetate(3ea)**

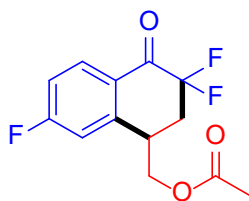

A light yellow solid (73% yield), purified by flash column chromatography on silica gel (petroleum ether/ethyl acetate = 80:1). m. p. (72.2 °C-73.7 °C)

$^1\text{H NMR}$  (400 MHz,  $\text{CDCl}_3$ )  $\delta$  = 8.17 - 8.04 (m, 1H), 7.18 - 7.13 (m, 2H), 4.45 - 4.40 (m, 2H), 3.62 - 3.56 (m, 1H), 2.76 - 2.53 (m, 2H), 2.08 (s, 3H).

$^{13}\text{C NMR}$  (100 MHz,  $\text{CDCl}_3$ )  $\delta$  = 183.4 (t,  $^2J_{\text{C-F}} = 26.0$  Hz), 170.7, 166.9 (d,  $^1J_{\text{C-F}} = 257.0$  Hz), 145.5 (d,  $^2J_{\text{C-F}} = 9.0$  Hz), 132.3 (d,  $^2J_{\text{C-F}} = 10.0$  Hz), 126.8, 116.2 (d,  $^2J_{\text{C-F}} = 22.0$  Hz), 115.0 (d,  $^2J_{\text{C-F}} = 23.0$  Hz), 113.1 (t,  $^1J_{\text{C-F}} = 246.0$  Hz), 65.7, 35.4, 34.6 (t,  $^2J_{\text{C-F}} = 22.0$  Hz), 20.7.

$^{19}\text{F NMR}$  (376 MHz,  $\text{CDCl}_3$ )  $\delta$  = -100.07(t,  $J = 6.0$  Hz, 1F), -105.64 (ddd,  $J = 274.5$ , 18.8, 11.3 Hz, 1F), -107.82 (ddd,  $J = 274.5$ , 18.8, 11.3 Hz, 1F).

**HRMS** (ESI-TOF):  $m/z$   $[\text{M}+\text{Na}]^+$  calcd for  $\text{C}_{13}\text{H}_{11}\text{O}_3\text{F}_3\text{Na}$ : 295.0558; found: 295.0551.  
**(7-chloro-3,3-difluoro-4-oxo-1,2,3,4-tetrahydronaphthalen-1-yl)methyl acetate(3fa)**

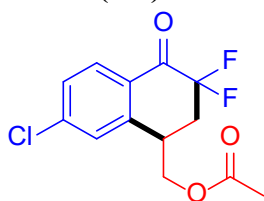

A light yellow solid (70% yield), purified by flash column chromatography on silica gel (petroleum ether/ethyl acetate = 80:1). m. p. (88.1°C-88.8 °C)

$^1\text{H NMR}$  (400 MHz,  $\text{CDCl}_3$ )  $\delta$  = 8.02 (d,  $J = 8.0$  Hz, 1H), 7.45 - 7.38 (m, 2H), 4.46 - 4.32 (m, 2H), 3.58 - 3.52 (m, 1H), 2.75 - 2.53 (m, 2H), 2.06 (s, 3H).

$^{13}\text{C NMR}$  (100 MHz,  $\text{CDCl}_3$ )  $\delta$  = 183.8 (t,  $^2J_{\text{C-F}} = 26.0$  Hz), 170.6, 143.7, 142.1, 130.6, 128.9, 128.5, 128.3, 113.0 (t,  $^1J_{\text{C-F}} = 246.0$  Hz), 65.7 (d,  $^4J_{\text{C-F}} = 3.0$  Hz), 35.3 (t,  $^3J_{\text{C-F}} = 4.0$  Hz), 34.4 (d,  $^2J_{\text{C-F}} = 22.0$  Hz), 20.7.

$^{19}\text{F NMR}$  (376 MHz,  $\text{CDCl}_3$ )  $\delta$  = -105.21 (ddd,  $J = 278.2$ , 22.6, 11.3 Hz, 1F), -107.72 (ddd,  $J = 278.2$ , 22.6, 11.3 Hz, 1F).

**HRMS** (ESI-TOF):  $m/z$   $[\text{M}+\text{Na}]^+$  calcd for  $\text{C}_{13}\text{H}_{11}\text{O}_3\text{F}_2\text{ClNa}$ : 311.0262; found: 311.0261.

**(7-bromo-3,3-difluoro-4-oxo-1,2,3,4-tetrahydronaphthalen-1-yl)methyl acetate(3ga)**

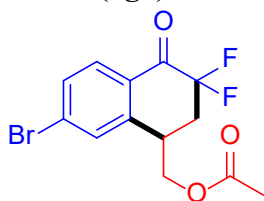

A light yellow solid (60% yield), purified by flash column chromatography on silica gel (petroleum ether/ethyl acetate = 80:1). m. p. (108.2 °C-108.8 °C)

$^1\text{H NMR}$  (400 MHz,  $\text{CDCl}_3$ )  $\delta$  = 7.94 (d,  $J = 8.0$  Hz, 1H), 7.63 - 7.56 (m, 2H), 4.47 -

4.32 (m, 2H), 3.59 -3.53 (m, 1H), 2.75 - 2.53 (m, 2H), 2.07 (s, 3H).

$^{13}\text{C}$  NMR (100 MHz,  $\text{CDCl}_3$ )  $\delta$  = 184.0 (t,  $^2J_{\text{C-F}}$  = 26.0 Hz), 170.6, 143.7, 131.9, 131.3, 131.1, 131.0, 129.0, 113.0 (t,  $^1J_{\text{C-F}}$  = 246.0 Hz), 65.7 (d,  $^4J_{\text{C-F}}$  = 3.0 Hz), 35.3 (t,  $^3J_{\text{C-F}}$  = 4.0 Hz), 34.3 (d,  $^2J_{\text{C-F}}$  = 22.0 Hz), 20.7.

$^{19}\text{F}$  NMR (376 MHz,  $\text{CDCl}_3$ )  $\delta$  = -105.05 (ddd,  $J$  = 274.5, 22.6, 11.3 Hz, 1F), -107.67 (ddd,  $J$  = 274.5, 18.8, 11.3 Hz, 1F).

HRMS (ESI-TOF):  $m/z$   $[\text{M}+\text{Na}]^+$  calcd for  $\text{C}_{13}\text{H}_{11}\text{BrO}_3\text{F}_2\text{Na}$ : 354.9757; found: 354.9760.

**(3,3-difluoro-5-methoxy-4-oxo-1,2,3,4-tetrahydronaphthalen-1-yl)methyl acetate(3ha)**

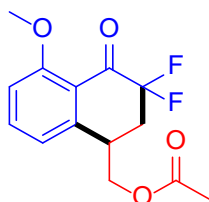

A light yellow oily (66% yield), purified by flash column chromatography on silica gel (petroleum ether/ethyl acetate = 80:1).

$^1\text{H}$  NMR (400 MHz,  $\text{CDCl}_3$ )  $\delta$  = 7.56 - 7.51 (m, 1H), 6.94 (d,  $J$  = 8.0 Hz, 2H), 4.40 - 4.35 (m, 1H), 4.27 - 4.22 (m, 1H), 3.89 (s, 3H), 3.49(s, 1H), 2.63 - 2.52 (m, 2H), 2.02 (s, 3H).

$^{13}\text{C}$  NMR (100 MHz,  $\text{CDCl}_3$ )  $\delta$  = 183.4 (t,  $^2J_{\text{C-F}}$  = 26.0 Hz), 170.8, 161.8, 144.1, 136.3, 120.2, 119.4, 113.1 (t,  $^1J_{\text{C-F}}$  = 246.0 Hz), 111.3, 68.7, 56.2, 35.8, 33.7 (t,  $^2J_{\text{C-F}}$  = 23.0 Hz), 20.8.

$^{19}\text{F}$  NMR (376 MHz,  $\text{CDCl}_3$ )  $\delta$  = -103.27 (ddd,  $J$  = 259.4, 33.8, 18.8 Hz, 1F), -104.62 (ddd,  $J$  = 259.4, 33.8, 18.8 Hz, 1F).

HRMS (ESI-TOF):  $m/z$   $[\text{M}+\text{Na}]^+$  calcd for  $\text{C}_{14}\text{H}_{14}\text{O}_4\text{F}_2\text{Na}$ : 307.0752; found: 307.0757.

**(3,3-difluoro-5-methyl-4-oxo-1,2,3,4-tetrahydronaphthalen-1-yl)methyl acetate(3ia)**

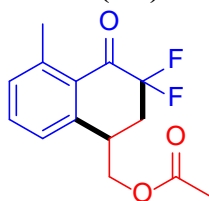

A light yellow oily (80% yield), purified by flash column chromatography on silica gel (petroleum ether/ethyl acetate = 80:1).

$^1\text{H}$  NMR (400 MHz,  $\text{CDCl}_3$ )  $\delta$  = 7.49 (t,  $J$  = 8.0 Hz, 1H), 7.30 (d,  $J$  = 8.0 Hz, 1H), 7.25 (d,  $J$  = 8.0 Hz, 1H), 4.47 - 4.42 (m, 1H), 3.33 - 3.28 (m, 1H), 3.58 - 3.55 (m, 1H), 2.70 - 2.59 (m, 5H), 2.07 (s, 3H).

$^{13}\text{C}$  NMR (100 MHz,  $\text{CDCl}_3$ )  $\delta$  = 186.3 (t,  $^2J_{\text{C-F}}$  = 26.0 Hz), 170.7, 143.7, 143.0, 134.2, 131.9, 128.6, 128.5, 113.2 (t,  $^1J_{\text{C-F}}$  = 246.0 Hz), 66.8 (d,  $^2J_{\text{C-F}}$  = 3.0 Hz), 36.0 (q,  $^2J_{\text{C-F}}$  = 3.0 Hz), 33.8 (t,  $^2J_{\text{C-F}}$  = 23.0 Hz), 23.0, 20.8.

$^{19}\text{F}$  NMR (376 MHz,  $\text{CDCl}_3$ )  $\delta$  = -103.27 (ddd,  $J$  = 274.5, 18.8, 11.3 Hz, 1F), -105.14 (ddd,  $J$  = 274.5, 18.8, 11.3 Hz, 1F).

**HRMS (ESI-TOF):**  $m/z$   $[M+Na]^+$  calcd for  $C_{14}H_{14}O_3F_2Na$ : 291.0803; found: 291.0809.

**(3,3,5-trifluoro-4-oxo-1,2,3,4-tetrahydronaphthalen-1-yl)methyl acetate(3ja)**

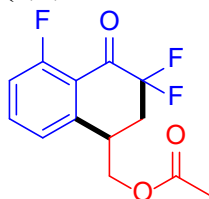

A light yellow oily (84% yield), purified by flash column chromatography on silica gel (petroleum ether/ethyl acetate = 80:1).

**$^1H$  NMR** (400 MHz,  $CDCl_3$ )  $\delta$  = 7.69 - 7.63 (m, 1H), 7.31 - 7.27 (m, 1H), 7.19 - 7.12 (m, 1H), 4.49 - 4.43 (m, 2H), 3.66 - 3.61 (m, 1H), 2.75 - 2.61 (m, 2H), 2.08 (s, 3H).

**$^{13}C$  NMR** (100 MHz,  $CDCl_3$ )  $\delta$  = 186.4 (t,  $^2J_{C-F}$  = 26.0 Hz), 170.7, 163.0 (d,  $^1J_{C-F}$  = 267.0 Hz), 144.0, 136.7 (d,  $^2J_{C-F}$  = 10.0 Hz), 124.1, 119.2, 116.5 (d,  $^2J_{C-F}$  = 20.0 Hz), 112.7 (t,  $^1J_{C-F}$  = 246.0 Hz), 66.2, 35.7, 34.0 (t,  $^2J_{C-F}$  = 23.0 Hz), 20.8.

**$^{19}F$  NMR** (376 MHz,  $CDCl_3$ )  $\delta$  = -104.97 (ddd,  $J$  = 270.1, 18.8, 11.3 Hz, 1F), -106.79 (ddd,  $J$  = 270.1, 18.8, 11.3 Hz, 1F), -108.55 (s, 1F).

**HRMS (ESI-TOF):**  $m/z$   $[M+Na]^+$  calcd for  $C_{13}H_{11}O_3F_3Na$ : 295.0553; found: 295.0557.

**(5-chloro-3,3-difluoro-4-oxo-1,2,3,4-tetrahydronaphthalen-1-yl)methyl acetate(3ka)**

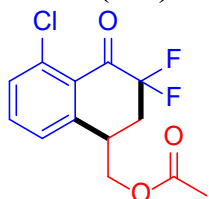

A light yellow oily (60% yield), purified by flash column chromatography on silica gel (petroleum ether/ethyl acetate = 80:1).

**$^1H$  NMR** (400 MHz,  $CDCl_3$ )  $\delta$  = 7.49 (t,  $J$  = 8.0 Hz, 1H), 7.41 (d,  $J$  = 8.0 Hz, 1H), 7.36 (d,  $J$  = 8.0 Hz, 1H), 4.39 - 4.25 (m, 2H), 3.59 - 3.53 (m, 1H), 2.73 - 2.53 (m, 2H), 2.00 (s, 3H).

**$^{13}C$  NMR** (100 MHz,  $CDCl_3$ )  $\delta$  = 183.4 (t,  $^2J_{C-F}$  = 26.0 Hz), 170.6, 144.6, 135.9, 134.8, 131.6, 127.6, 127.4, 113.0 (d,  $^1J_{C-F}$  = 246.0 Hz), 66.5, 35.8 (t,  $^2J_{C-F}$  = 5.0 Hz), 33.6 (t,  $^2J_{C-F}$  = 23.0 Hz), 20.7.

**$^{19}F$  NMR** (376 MHz,  $CDCl_3$ )  $\delta$  = -104.07 (ddd,  $J$  = 267.0, 22.6, 15.0 Hz, 1F), -105.13 (ddd,  $J$  = 267.0, 22.6, 15.0 Hz, 1F).

**HRMS (ESI-TOF):**  $m/z$   $[M+Na]^+$  calcd for  $C_{13}H_{11}O_3F_2ClNa$ : 311.0257; found: 311.0262.

**(3,3-difluoro-4-oxo-7-phenyl-1,2,3,4-tetrahydronaphthalen-1-yl)methyl acetate(3la)**

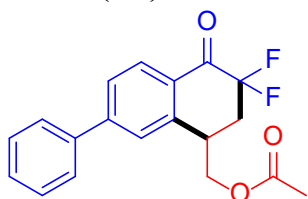

A light yellow solid (74% yield), purified by flash column chromatography on silica



gel (petroleum ether/ethyl acetate = 80:1). m.p. (101.0 °C-103.1°C)

**<sup>1</sup>H NMR** (400 MHz, CDCl<sub>3</sub>) δ = 8.20 (d, *J* = 8.0 Hz, 1H), 7.68 - 7.63 (m, 4H), 7.52 - 7.43 (m, 3H), 4.57 - 4.45 (m, 2H), 3.70 - 3.64 (m, 1H), 2.79 - 2.66 (m, 2H), 2.11 (s, 3H).

**<sup>13</sup>C NMR** (100 MHz, CDCl<sub>3</sub>) δ = 184.5 (t, <sup>2</sup>*J*<sub>C-F</sub> = 26.0 Hz), 170.8, 148.1, 142.6, 139.1, 129.8, 129.2, 129.0, 128.9, 127.4, 127.1, 126.7, 113.4 (t, <sup>1</sup>*J*<sub>C-F</sub> = 246.0 Hz), 65.1 (d, <sup>4</sup>*J*<sub>C-F</sub> = 2.0 Hz), 35.7 (q, <sup>3</sup>*J*<sub>C-F</sub> = 3.0 Hz), 34.5 (d, <sup>2</sup>*J*<sub>C-F</sub> = 23.0 Hz), 20.8.

**<sup>19</sup>F NMR** (376 MHz, CDCl<sub>3</sub>) δ = -104.41 (ddd, *J* = 278.2, 18.8, 11.3 Hz, 1F), -107.24 (ddd, *J* = 278.2, 18.8, 11.3 Hz, 1F).

**HRMS** (ESI-TOF): *m/z* [M+Na]<sup>+</sup> calcd for C<sub>19</sub>H<sub>16</sub>O<sub>3</sub>F<sub>2</sub>Na: 353.0560; found: 353.0964.

**(3,3-difluoro-7-isobutyl-4-oxo-1,2,3,4-tetrahydronaphthalen-1-yl)methyl acetate(3ma)**

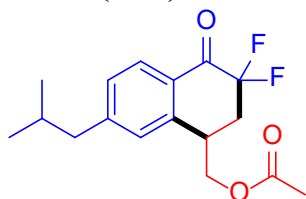

A light yellow oily (79% yield), purified by flash column chromatography on silica gel (petroleum ether/ethyl acetate = 80:1).

**<sup>1</sup>H NMR** (400 MHz, CDCl<sub>3</sub>) δ = 8.05 - 8.02 (m, 1H), 7.25 - 7.20 (m, 2H), 4.48 - 4.36 (m, 2H), 3.58 - 3.53 (m, 1H), 2.72 - 2.50 (m, 4H), 2.07 (s, 3H), 1.94 - 1.86 (m, 1H), 0.93 - 0.89 (m, 6H).

**<sup>13</sup>C NMR** (100 MHz, CDCl<sub>3</sub>) δ = 184.4 (t, <sup>2</sup>*J*<sub>C-F</sub> = 26.0 Hz), 170.7, 150.5, 141.8, 129.4, 129.1, 128.7, 128.0, 113.3 (t, <sup>1</sup>*J*<sub>C-F</sub> = 246.0 Hz), 66.1 (d, <sup>2</sup>*J*<sub>C-F</sub> = 3.0 Hz), 45.6, 34.5 (t, <sup>2</sup>*J*<sub>C-F</sub> = 5.0 Hz), 34.6 (t, <sup>2</sup>*J*<sub>C-F</sub> = 23.0 Hz), 30.1, 22.4, 22.2, 20.7.

**<sup>19</sup>F NMR** (376 MHz, CDCl<sub>3</sub>) δ = -104.43 (ddd, *J* = 274.5, 22.6, 11.3 Hz, 1F), -107.44 (ddd, *J* = 274.5, 22.6, 11.3 Hz, 1F).

**HRMS** (ESI-TOF): *m/z* [M+Na]<sup>+</sup> calcd for C<sub>17</sub>H<sub>20</sub>O<sub>3</sub>F<sub>2</sub>Na: 333.1273; found: 333.1278.

**(3,3-difluoro-6-methyl-4-oxo-1,2,3,4-tetrahydronaphthalen-1-yl)methyl acetate and (3,3-difluoro-8-methyl-4-oxo-1,2,3,4-tetrahydronaphthalen-1-yl)methyl acetate (3na:3na'=4:5)**

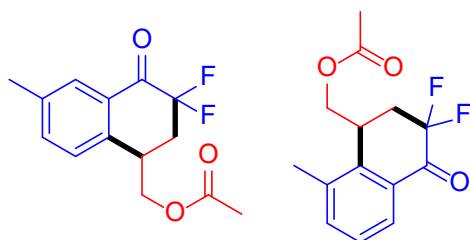

A light yellow oily (75% yield), purified by flash column chromatography on silica gel (petroleum ether/ethyl acetate = 80:1).

**<sup>1</sup>H NMR** (400 MHz, CDCl<sub>3</sub>) δ = 7.97 - 7.84 (m, 1H), 7.51 - 7.41 (m, 1H), 7.36 - 7.28 (m, 1H), 4.44 - 3.92 (m, 2H), 3.71 - 3.49 (m, 1H), 2.98 - 2.33 (m, 5H), 2.09 - 2.02 (m, 3H).

**<sup>13</sup>C NMR** (100 MHz, CDCl<sub>3</sub>) δ = 185.0 (t, <sup>2</sup>*J*<sub>C-F</sub> = 27.0 Hz), 170.7, 140.1, 139.2, 138.3, 137.7, 137.4, 136.5, 113.4 (t, <sup>1</sup>*J*<sub>C-F</sub> = 246.0 Hz), 64.7, 34.5, 33.5 (d, t, <sup>2</sup>*J*<sub>C-F</sub> = 11.0 Hz), 32.9 (t, <sup>2</sup>*J*<sub>C-F</sub> = 22.0 Hz), 20.7.

<sup>19</sup>F NMR (376 MHz, CDCl<sub>3</sub>) δ = -96.81 (ddd, *J* = 285.8, 26.32, 15.0 Hz, 1F), -103.16 (dd, *J* = 289.5, 26.32 Hz, 1F).

<sup>1</sup>H NMR (400 MHz, CDCl<sub>3</sub>) δ = 7.97 - 7.84 (m, 1H), 7.51 - 7.41 (m, 1H), 7.36 - 7.28 (m, 1H), 4.44 - 3.92 (m, 2H), 3.71 - 3.49 (m, 1H), 2.98 - 2.33 (m, 5H), 2.09 - 2.02 (m, 3H).

<sup>13</sup>C NMR (100 MHz, CDCl<sub>3</sub>) δ = 185.0 (t, <sup>2</sup>*J*<sub>C-F</sub> = 27.0 Hz), 170.7, 130.7, 129.9, 129.0, 128.3, 128.1, 127.2, 112.7 (t, <sup>1</sup>*J*<sub>C-F</sub> = 246.0 Hz), 66.1, 35.1, 34.5 (t, <sup>2</sup>*J*<sub>C-F</sub> = 20.0 Hz), 32.9 (t, <sup>2</sup>*J*<sub>C-F</sub> = 22.0 Hz), 18.8.

<sup>19</sup>F NMR (376 MHz, CDCl<sub>3</sub>) δ = -104.76 (ddd, *J* = 274.5, 18.8, 11.3 Hz, 1F), -107.55 (ddd, *J* = 274.5, 18.8, 11.3 Hz, 1F).

**HRMS (ESI-TOF):** *m/z* [M+Na]<sup>+</sup> calcd for C<sub>14</sub>H<sub>14</sub>O<sub>3</sub>F<sub>2</sub>Na: 291.0803; found: 291.0809.  
**(8,8-difluoro-9-oxo-7,8,9,11-tetrahydro-6H-benzo[b]fluoren-6-yl)methyl acetate and (3,3-difluoro-4-oxo-2,3,4,11-tetrahydro-1H-benzo[a]fluoren-1-yl)methyl acetate (30a:30a'=1:1.4)**

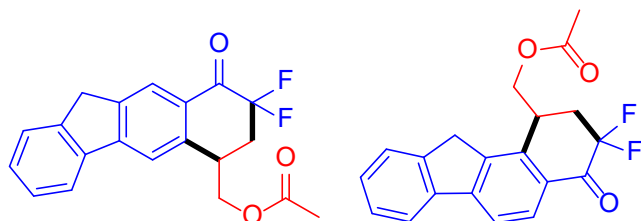

A light yellow oily (79% yield), purified by flash column chromatography on silica gel (petroleum ether/ethyl acetate = 80:1).

<sup>1</sup>H NMR (400 MHz, CDCl<sub>3</sub>) δ = 8.23 (d, *J* = 8.0 Hz, 1H), 7.85 (d, *J* = 4.0 Hz, 2H), 7.46 - 7.43 (m, 3H), 4.63 (t, *J* = 12.0 Hz, 1H), 4.19 - 4.15 (m, 1H), 3.92 (d, *J* = 8.0 Hz, 1H), 3.76 (s, 1H), 3.02 (t, *J* = 12.0 Hz, 1H), 2.76 - 2.63 (m, 1H), 2.18 (d, *J* = 4.0 Hz, 3H), 1.29 (t, *J* = 12.0 Hz, 1H).

<sup>13</sup>C NMR (100 MHz, CDCl<sub>3</sub>) δ = 184.5 (t, <sup>2</sup>*J*<sub>C-F</sub> = 24.0 Hz), 170.9, 149.0, 144.4, 142.0, 139.6, 138.1, 129.2, 129.0, 128.4, 127.4, 125.5, 121.4, 120.2, 113.0 (t, <sup>1</sup>*J*<sub>C-F</sub> = 249.0 Hz), 65.1 (d, <sup>2</sup>*J*<sub>C-F</sub> = 5.0 Hz), 35.78 (d, <sup>2</sup>*J*<sub>C-F</sub> = 3.0 Hz), 35.6, 33.0 (t, <sup>2</sup>*J*<sub>C-F</sub> = 22.0 Hz), 20.94 (d, <sup>2</sup>*J*<sub>C-F</sub> = 8.0 Hz).

<sup>19</sup>F NMR (376 MHz, CDCl<sub>3</sub>) δ = -96.70 (ddd, *J* = 270.7, 37.6, 15.0 Hz, 1F), -103.84 (ddd, *J* = 278.2, 18.8, 11.3 Hz, 1F), -103.93 (d, *J* = 285.8 Hz, 1F).

<sup>1</sup>H NMR (400 MHz, CDCl<sub>3</sub>) δ = 8.28 (s, 1H), 7.85 (d, *J* = 4.0 Hz, 2H), 7.84 (d, *J* = 4.0 Hz, 1H), 7.79 (s, 1H), 7.59 (t, *J* = 8.0 Hz, 1H), 4.44 (t, *J* = 8.0 Hz, 1H), 4.13 (d, *J* = 4.0 Hz, 1H), 3.97 (s, 1H), 3.76 (s, 1H), 3.02 (t, *J* = 12.0 Hz, 1H), 2.58 - 2.50 (m, 1H), 2.15 (d, *J* = 4.0 Hz, 3H), 2.07 (d, *J* = 4.0 Hz, 1H).

<sup>13</sup>C NMR (100 MHz, CDCl<sub>3</sub>) δ = 185.0 (t, <sup>2</sup>*J*<sub>C-F</sub> = 26.0 Hz), 170.9, 148.9, 145.1, 246.0, 141.3, 140.0, 138.1, 129.2, 127.4, 125.5, 125.4, 121.4, 118.9, 113.4 (t, <sup>1</sup>*J*<sub>C-F</sub> = 123.0 Hz), 66.3 (d, <sup>2</sup>*J*<sub>C-F</sub> = 8.0 Hz), 36.6, 35.7 (d, <sup>2</sup>*J*<sub>C-F</sub> = 4.0 Hz), 34.7 (d, <sup>2</sup>*J*<sub>C-F</sub> = 10.0 Hz), 34.5 (t, <sup>2</sup>*J*<sub>C-F</sub> = 19.0 Hz).

<sup>19</sup>F NMR (376 MHz, CDCl<sub>3</sub>) δ = -103.88 (ddd, *J* = 274.5, 18.8, 15.0 Hz, 1F), -106.93 (ddd, *J* = 278.2, 18.8, 11.3 Hz, 1F).

**HRMS (ESI-TOF):** *m/z* [M+Na]<sup>+</sup> calcd for C<sub>20</sub>H<sub>16</sub>O<sub>3</sub>F<sub>2</sub>Na: 365.0960; found: 365.0963.  
**(2,2-difluoro-1-oxo-1,2,3,4-tetrahydrophenanthren-4-yl)methyl acetate (3pa)**

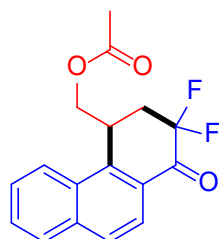

A light yellow oily (79% yield), purified by flash column chromatography on silica gel (petroleum ether/ethyl acetate = 80:1).

**<sup>1</sup>H NMR** (400 MHz, CDCl<sub>3</sub>) δ = 8.43 (d, *J* = 8.0 Hz, 1H), 8.12 (d, *J* = 8.0 Hz, 1H), 7.92 - 7.86 (m, 2H), 7.73 - 7.67 (m, 2H), 4.71 (d, *J* = 12.0 Hz, 1H), 4.37 (s, 1H), 4.14 (t, *J* = 8.0 Hz, 1H), 3.16 - 3.08 (m, 1H), 2.70 - 2.53 (m, 1H), 2.18 (s, 3H).

**<sup>13</sup>C NMR** (100 MHz, CDCl<sub>3</sub>) δ = 185.0 (t, <sup>2</sup>*J*<sub>C-F</sub> = 26.0 Hz), 171.1, 141.2, 136.7, 130.3, 129.5 (t, <sup>2</sup>*J*<sub>C-F</sub> = 26.0 Hz), 129.0, 128.2, 125.3, 124.5 (t, <sup>2</sup>*J*<sub>C-F</sub> = 4.0 Hz), 123.9, 123.1, 112.7 (t, <sup>1</sup>*J*<sub>C-F</sub> = 246.0 Hz), 66.0 (d, <sup>2</sup>*J*<sub>C-F</sub> = 5.0 Hz), 33.0 (t, <sup>2</sup>*J*<sub>C-F</sub> = 11.0 Hz), 32.7, 19.0.

**<sup>19</sup>F NMR** (376 MHz, CDCl<sub>3</sub>) δ = -97.75 (ddd, *J* = 285.8, 37.6 15.0 Hz, 1F), -104.59 (dd, *J* = 282.0, 7.52 Hz, 1F).

**HRMS** (ESI-TOF): *m/z* [M+Na]<sup>+</sup> calcd for C<sub>17</sub>H<sub>14</sub>O<sub>3</sub>F<sub>2</sub>Na: 327.0803; found: 327.0808.  
**(6,6-difluoro-7-oxo-4,5,6,7-tetrahydrobenzo[b]thiophen-4-yl)methyl acetate(3qa)**

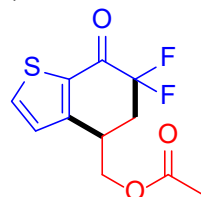

A light yellow oily (30% yield), purified by flash column chromatography on silica gel (petroleum ether/ethyl acetate = 80:1).

**<sup>1</sup>H NMR** (400 MHz, CDCl<sub>3</sub>) δ = 7.91 - 7.89 (m, 1H), 7.19 - 7.17 (m, 1H), 4.44 (d, *J* = 8.0 Hz, 2H), 3.63 - 3.56 (m, 1H), 2.28 - 2.71 (m, 1H), 2.60 - 2.45 (m, 1H), 2.11 (s, 3H).

**<sup>13</sup>C NMR** (100 MHz, CDCl<sub>3</sub>) δ = 178.3 (t, <sup>2</sup>*J*<sub>C-F</sub> = 26.0 Hz), 170.7, 151.9, 138.3, 134.5, 127.3, 114.2 (t, <sup>1</sup>*J*<sub>C-F</sub> = 246.0 Hz), 65.2, 36.3 (t, <sup>2</sup>*J*<sub>C-F</sub> = 23.0 Hz), 34.1 (q, <sup>3</sup>*J*<sub>C-F</sub> = 83.0 Hz), 20.8.

**<sup>19</sup>F NMR** (376 MHz, CDCl<sub>3</sub>) δ = -106.77 (ddd, *J* = 274.5, 26.3, 11.3 Hz, 1F), -108.29 (ddd, *J* = 278.2, 15.0, 7.52 Hz, 1F).

**HRMS** (ESI-TOF): *m/z* [M+Na]<sup>+</sup> calcd for C<sub>11</sub>H<sub>10</sub>O<sub>3</sub>F<sub>2</sub>SNa: 283.0211; found: 283.0219.

**4,4-difluoro-2-iodo-5-oxo-5-phenylpentyl acetate(4aa)**

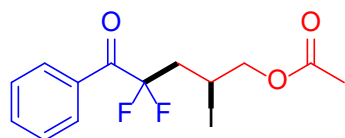

A light yellow oily (80% yield), purified by flash column chromatography on silica gel (petroleum ether/ethyl acetate = 80:1).

**<sup>1</sup>H NMR** (400 MHz, CDCl<sub>3</sub>) δ = 8.12 (d, *J* = 8.0 Hz, 2H), 7.68 (t, *J* = 8.0 Hz, 1H), 7.53 (t, *J* = 8.0 Hz, 2H), 4.52 - 4.42 (m, 2H), 4.31 (q, *J* = 8.0 Hz, 1H), 3.16 - 2.91 (m, 2H),

2.09 (s, 3H).

$^{13}\text{C}$  NMR (100 MHz,  $\text{CDCl}_3$ )  $\delta$  = 185.2 (t,  $^2J_{\text{C-F}}$  = 30.0 Hz), 170.2, 143.7, 131.5, 130.3 (t,  $^1J_{\text{C-F}}$  = 3.0 Hz), 128.9, 118.6 (t,  $^1J_{\text{C-F}}$  = 254.0 Hz), 68.9, 41.0 (t,  $^2J_{\text{C-F}}$  = 22.0 Hz), 20.8, 15.1 (t,  $^2J_{\text{C-F}}$  = 3.0 Hz).

$^{19}\text{F}$  NMR (376 MHz,  $\text{CDCl}_3$ )  $\delta$  = -98.58 (dd,  $J$  = 33.84, 18.8 Hz, 2F).

HRMS (ESI-TOF):  $m/z$   $[\text{M}+\text{Na}]^+$  calcd for  $\text{C}_{13}\text{H}_{13}\text{O}_3\text{F}_2\text{INa}$ : 404.9770; found: 404.9771.

#### 4,4-difluoro-2-iodo-5-(4-methoxyphenyl)-5-oxopentyl acetate(4ba)

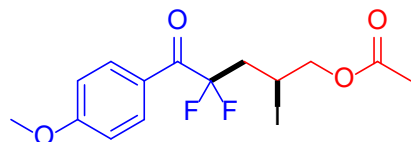

A light yellow oily (80% yield), purified by flash column chromatography on silica gel (petroleum ether/ethyl acetate = 80:1).

$^1\text{H}$  NMR (400 MHz,  $\text{CDCl}_3$ )  $\delta$  = 8.11 (d,  $J$  = 6.0 Hz, 2H), 6.99 (d,  $J$  = 4.0 Hz, 1H), 6.97 (d,  $J$  = 4.0 Hz, 1H), 4.52 - 4.40 (m, 2H), 4.30 (q,  $J$  = 4.0 Hz, 1H), 3.90 (s, 3H), 3.13 - 2.88 (m, 2H), 2.09 (s, 3H).

$^{13}\text{C}$  NMR (100 MHz,  $\text{CDCl}_3$ )  $\delta$  = 186.6 (t,  $^2J_{\text{C-F}}$  = 30.0 Hz), 170.2, 164.8, 132.9 (t,  $^2J_{\text{C-F}}$  = 3.0 Hz), 124.3, 118.8 (t,  $^1J_{\text{C-F}}$  = 254.0 Hz), 114.2, 68.9, 55.7, 41.1 (t,  $^2J_{\text{C-F}}$  = 22.0 Hz), 20.8, 15.4 (t,  $^2J_{\text{C-F}}$  = 4.0 Hz).

$^{19}\text{F}$  NMR (376 MHz,  $\text{CDCl}_3$ )  $\delta$  = -98.14 (dd,  $J$  = 33.84, 15.0 Hz, 2F).

HRMS (ESI-TOF):  $m/z$   $[\text{M}+\text{Na}]^+$  calcd for  $\text{C}_{14}\text{H}_{15}\text{O}_4\text{F}_2\text{INa}$ : 434.9875; found: 434.9873.

#### 4,4-difluoro-2-iodo-5-(naphthalen-2-yl)-5-oxopentyl acetate(4ca)

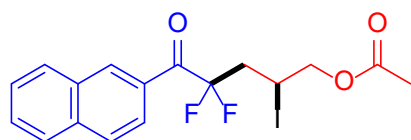

A light yellow oily (80% yield), purified by flash column chromatography on silica gel (petroleum ether/ethyl acetate = 80:1).

$^1\text{H}$  NMR (400 MHz,  $\text{CDCl}_3$ )  $\delta$  = 8.73 (s, 1H), 8.10 (d,  $J$  = 8.0 Hz, 1H), 8.01 (d,  $J$  = 8.0 Hz, 1H), 7.92 (q,  $J$  = 8.0 Hz, 2H), 7.68 (t,  $J$  = 8.0 Hz, 1H), 7.60 (t,  $J$  = 8.0 Hz, 1H), 4.58 - 4.46 (m, 2H), 4.38 - 4.33 (m, 1H), 3.23 - 2.99 (m, 2H), 2.10 (s, 3H).

$^{13}\text{C}$  NMR (100 MHz,  $\text{CDCl}_3$ )  $\delta$  = 188.1 (t,  $^2J_{\text{C-F}}$  = 31.0 Hz), 170.3, 136.2, 133.1, 132.3, 130.2, 129.7, 128.8, 128.6, 127.9, 127.2, 124.8, 118.8 (t,  $^1J_{\text{C-F}}$  = 254.0 Hz), 68.9, 41.1 (t,  $^2J_{\text{C-F}}$  = 23.0 Hz), 20.8, 15.2.

$^{19}\text{F}$  NMR (376 MHz,  $\text{CDCl}_3$ )  $\delta$  = -97.85 (dd,  $J$  = 37.60, 18.8 Hz, 2F).

HRMS (ESI-TOF):  $m/z$   $[\text{M}+\text{Na}]^+$  calcd for  $\text{C}_{17}\text{H}_{15}\text{O}_3\text{F}_2\text{INa}$ : 454.9926; found: 454.9921.

## 7 References

[1] a) I. Saidalimu, X. Fang, F. H. Wu, *Angew. Chem. Int. Ed.* **2013**, *52*, 5566-5570; b) H. Chen, J. X. Wang, J. J. Wu, Y. J. Kuang, F. H. Wu, *J. Fluor. Chem.* **2017**, *200*, 41-46; c) J. X. Wang, J. J. Wu, H. Chen, S. W. Zhang, F. H. Wu, *Chin. Chem. Lett.* **2019**, *26*, 1381-1384.

[2] White, M. C., W. Liu, R. L. Ma: Sulfoxide Ligand Metal Catalyzed: *US 10266503*

BI [P]. 2019-4-23.

## 8 NMR spectra ( $^1\text{H}$ , $^{13}\text{C}$ and $^{19}\text{F}$ )

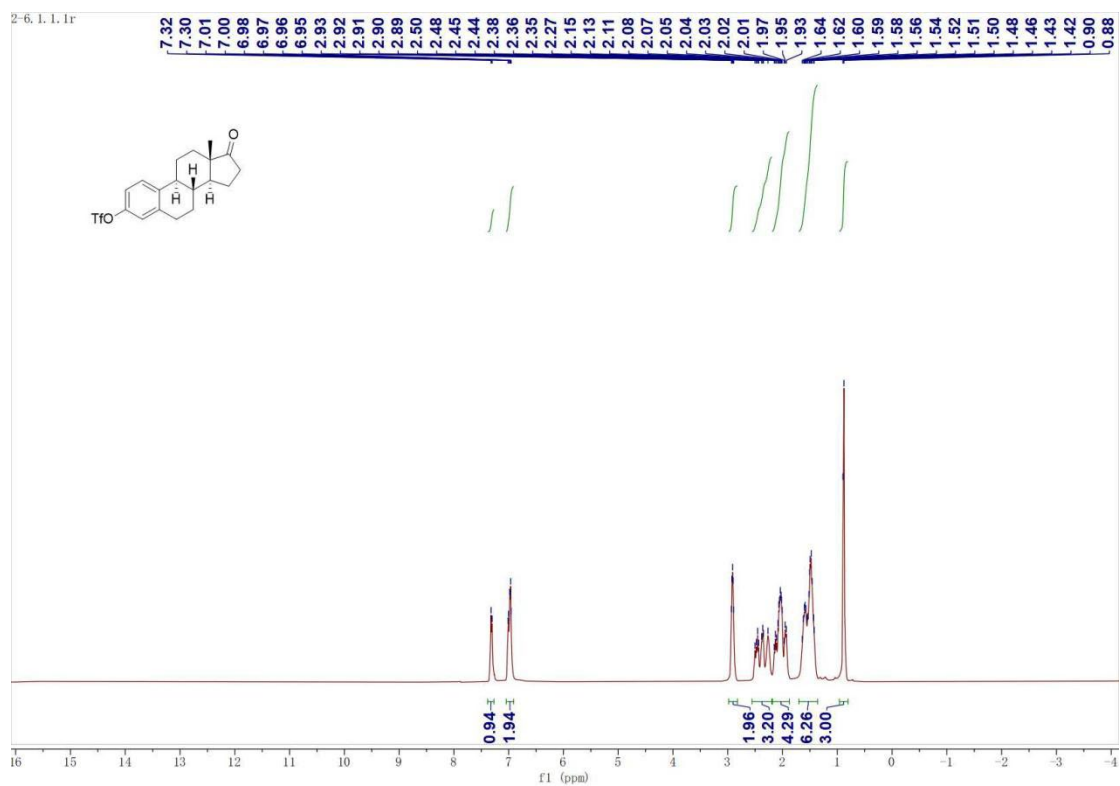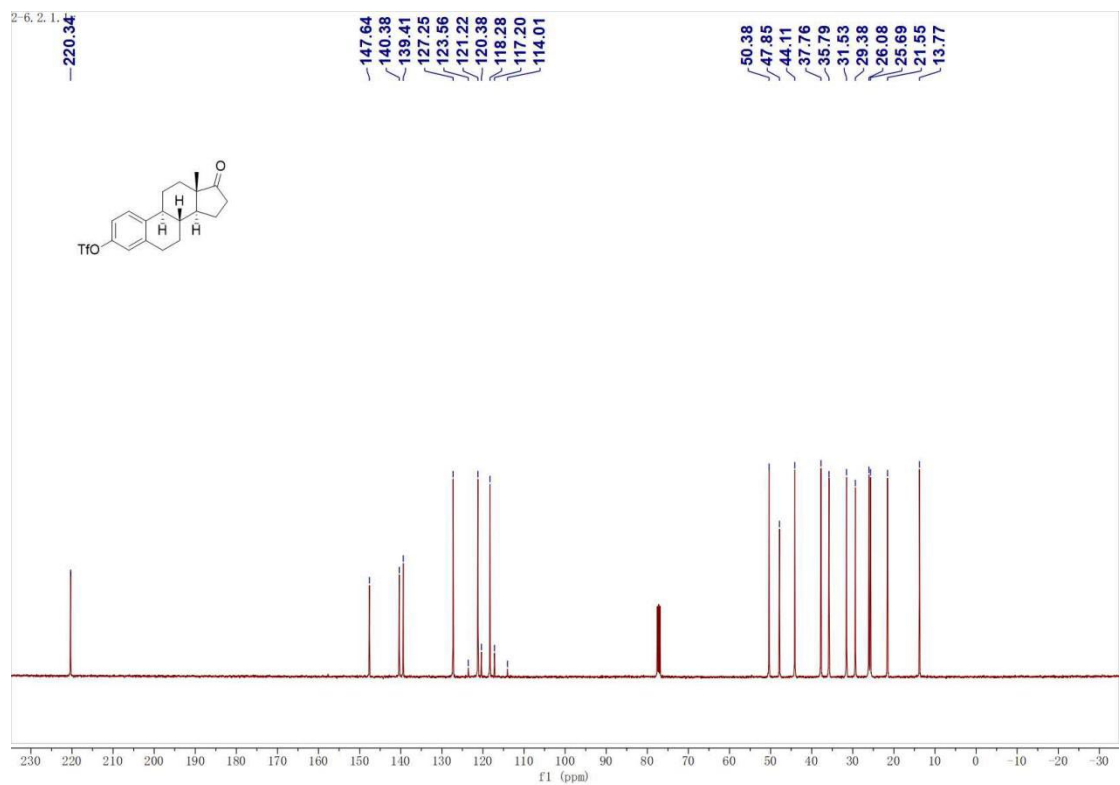

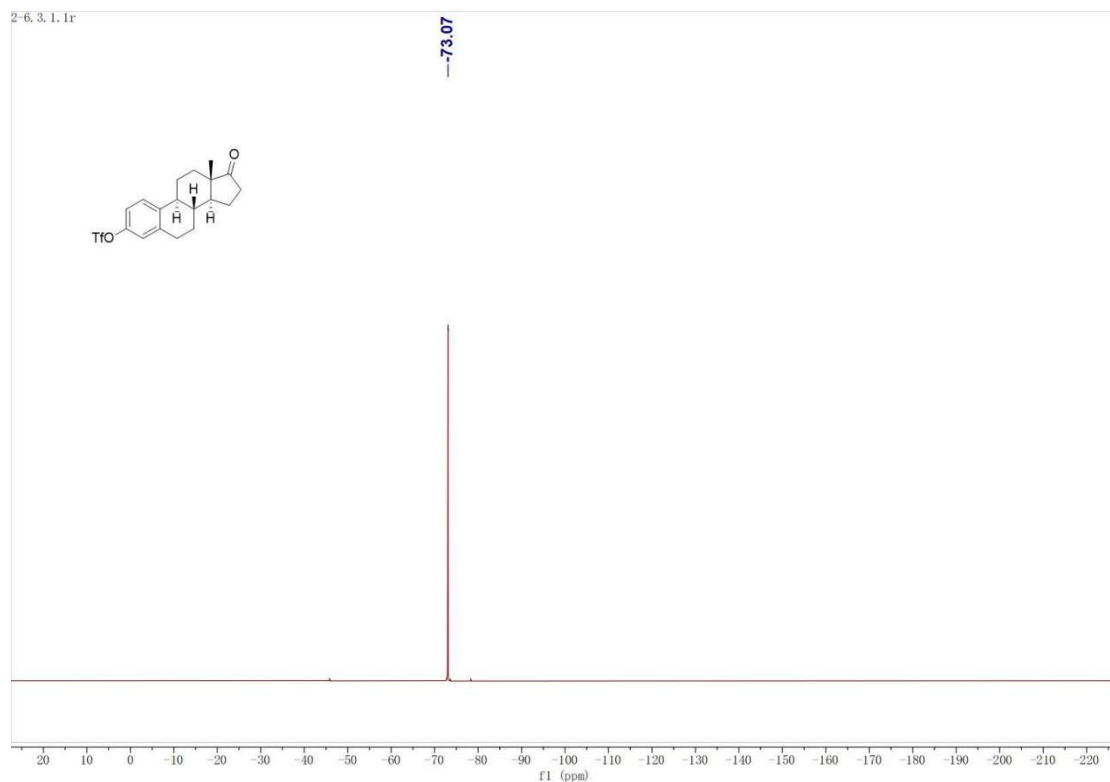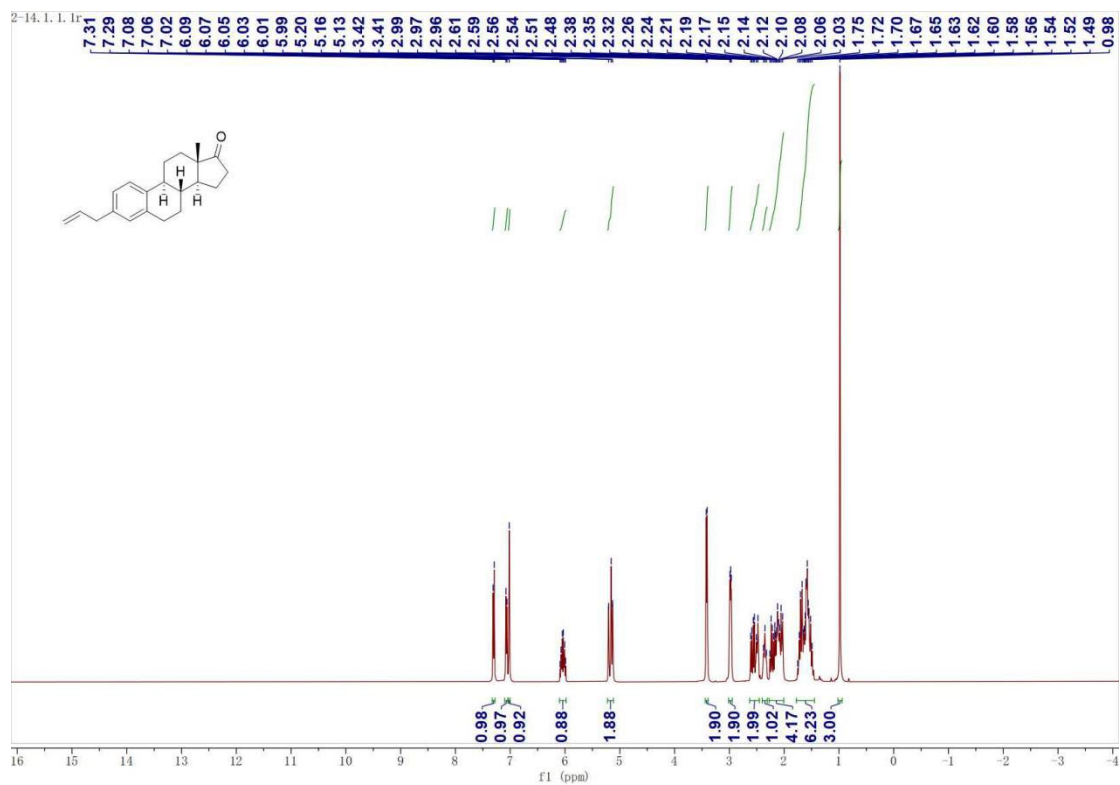

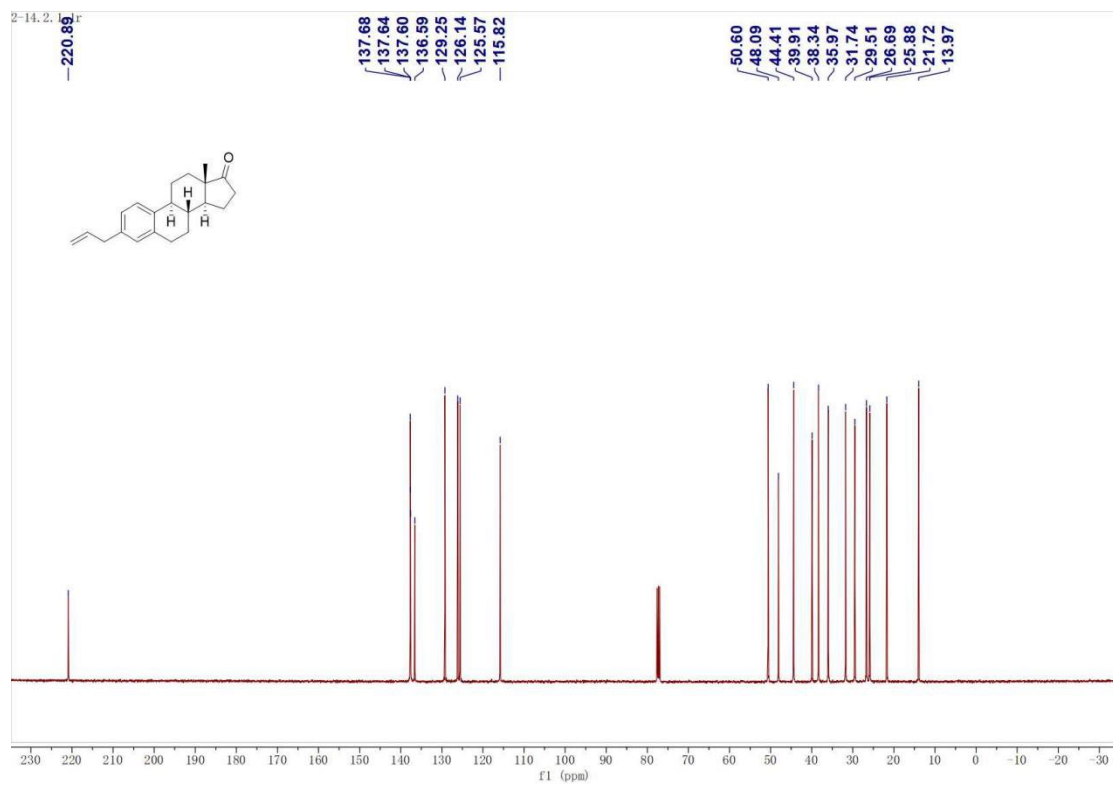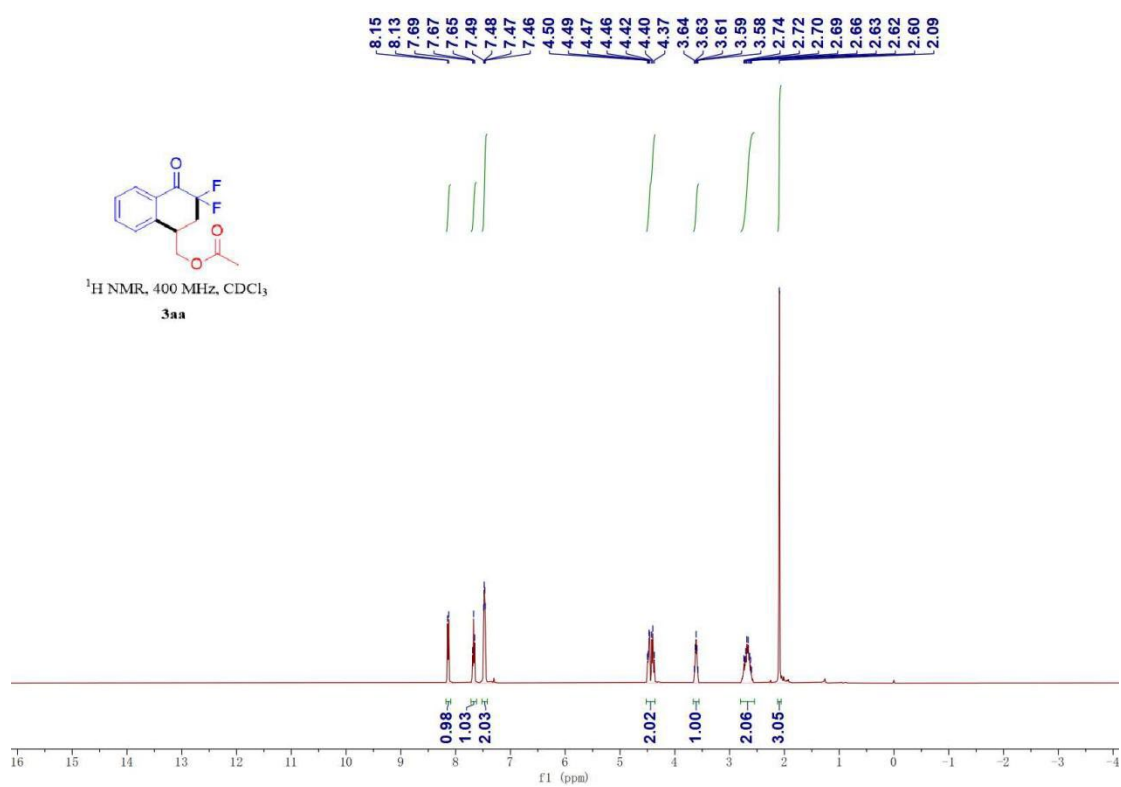

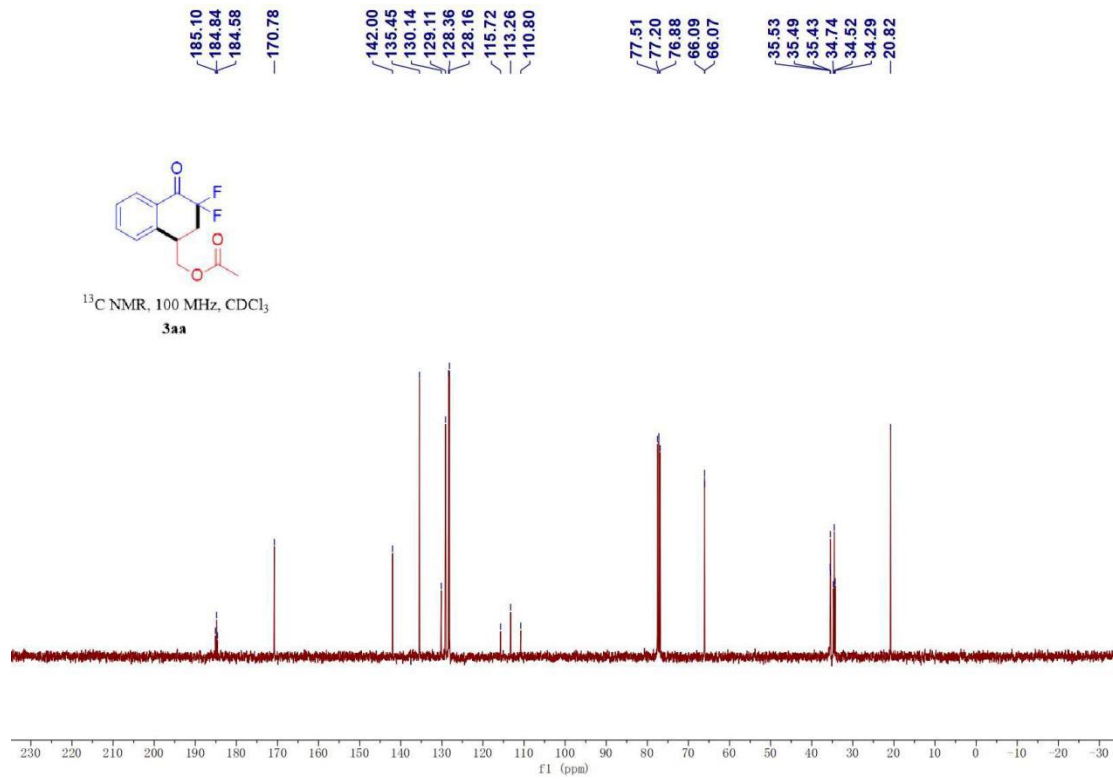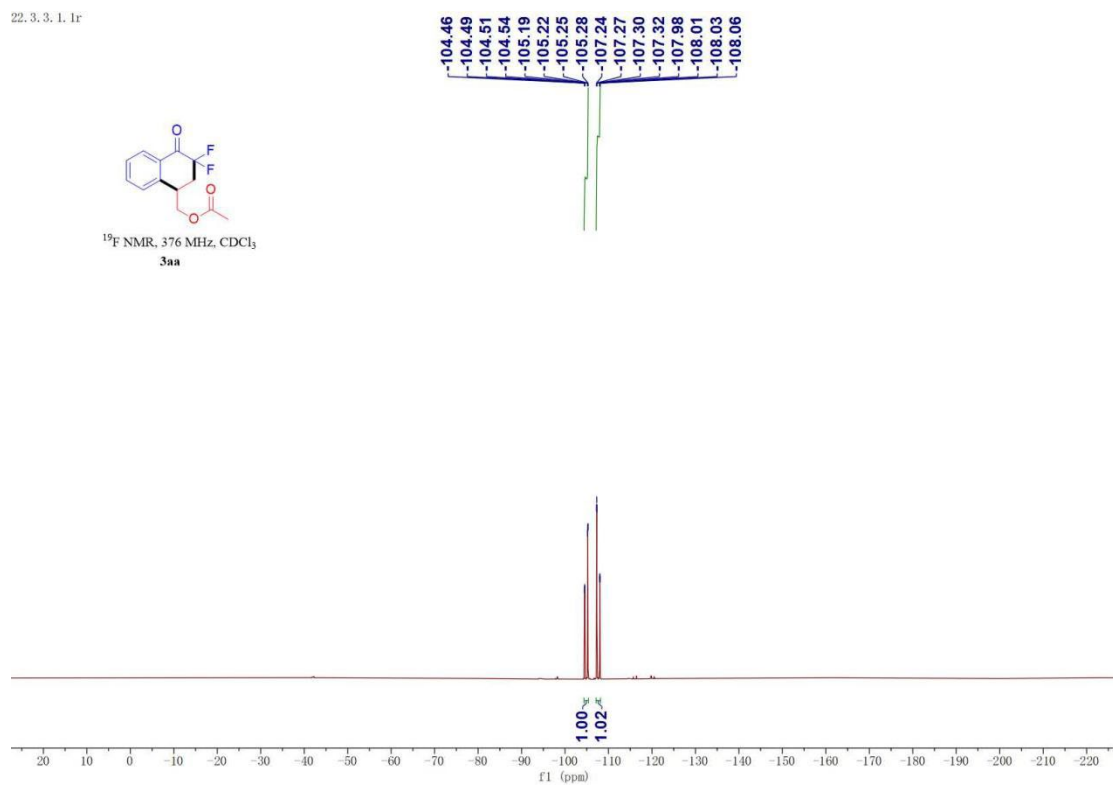



35. 1. 1. 1r

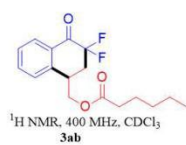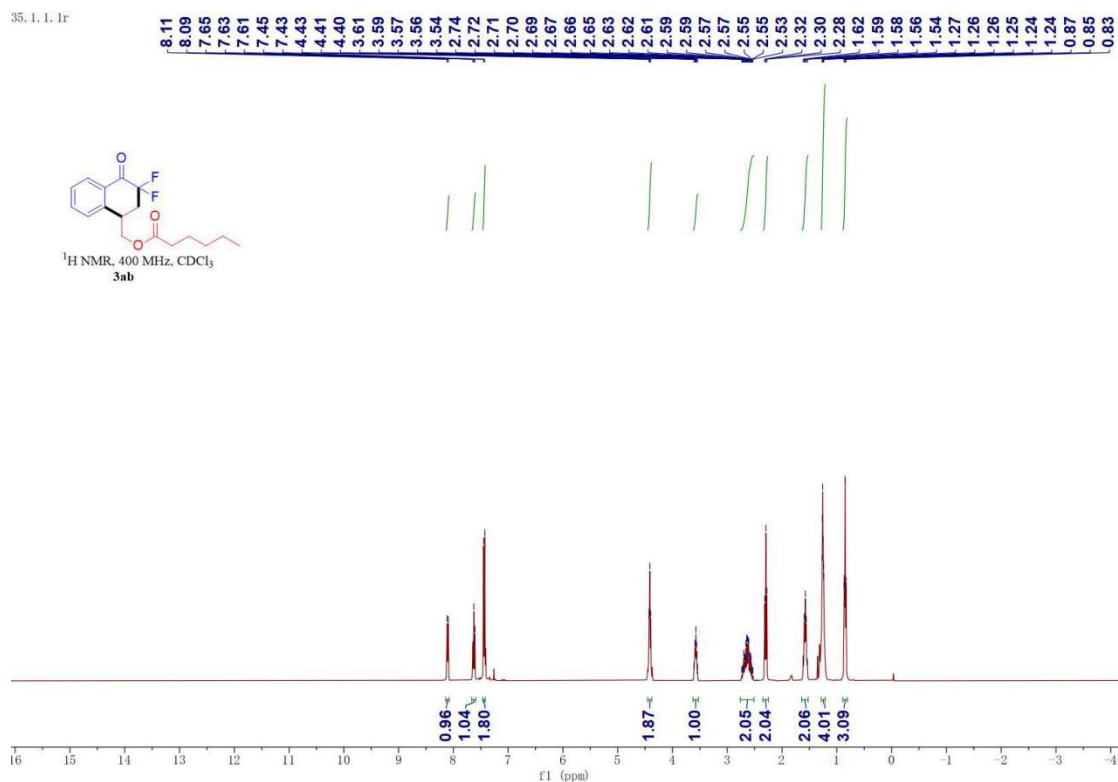

35. 2. 1. 1r

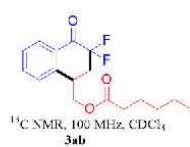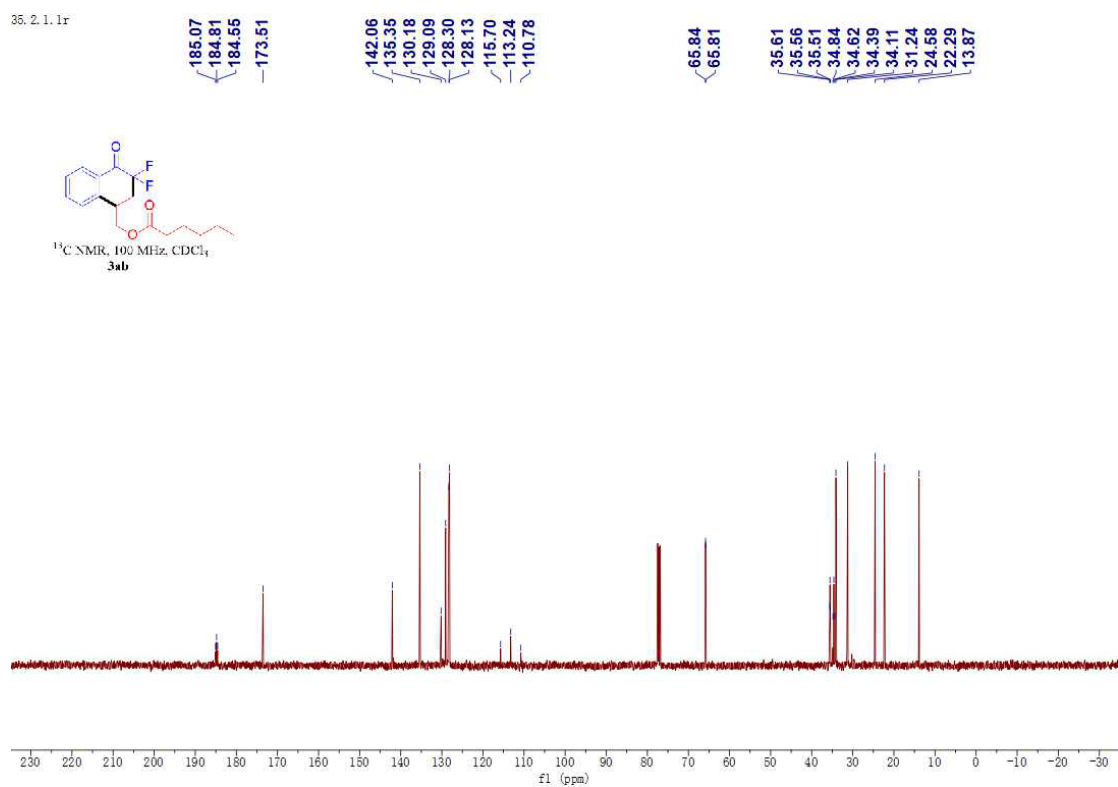



1-5.2.1.1f

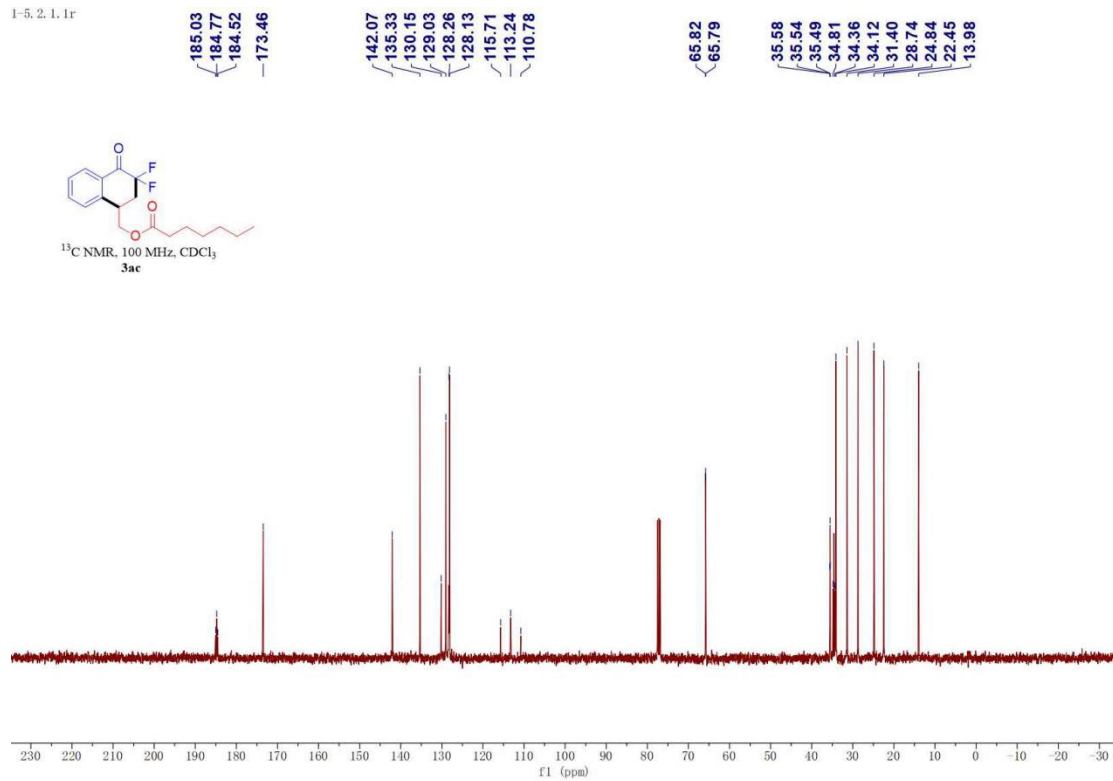

1-5.3.1.1f

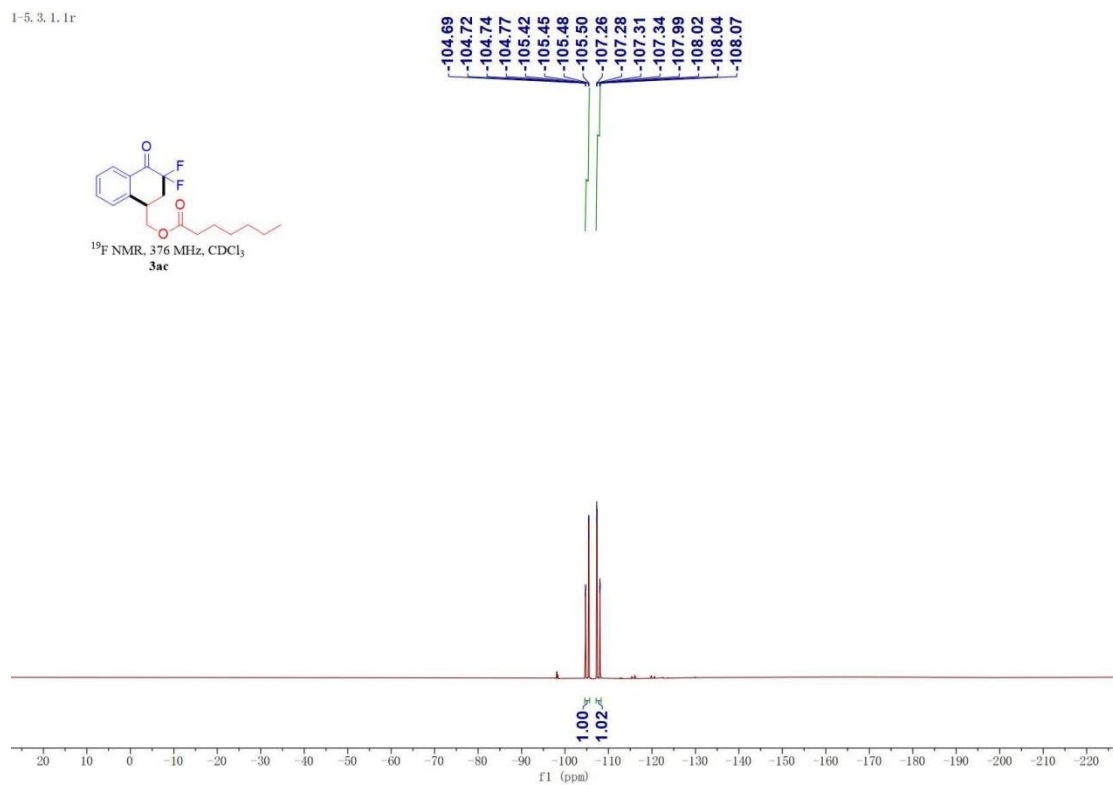

4.25-1-11, 1.1.1r

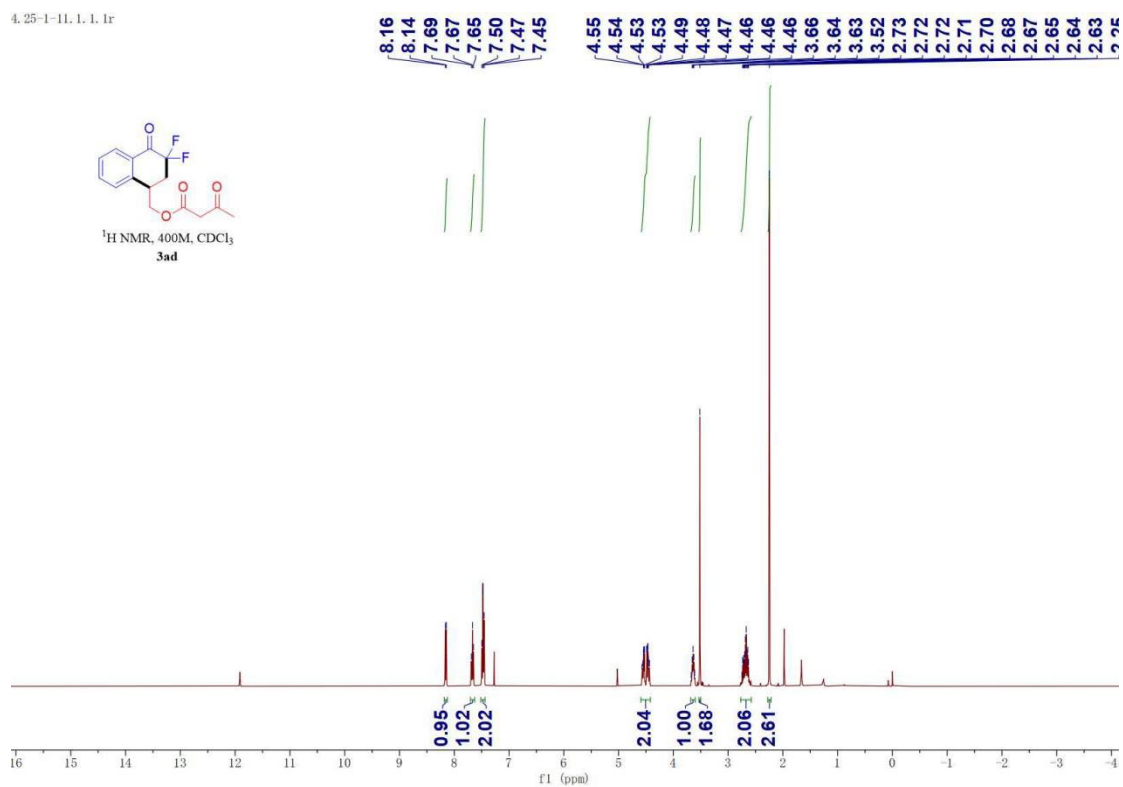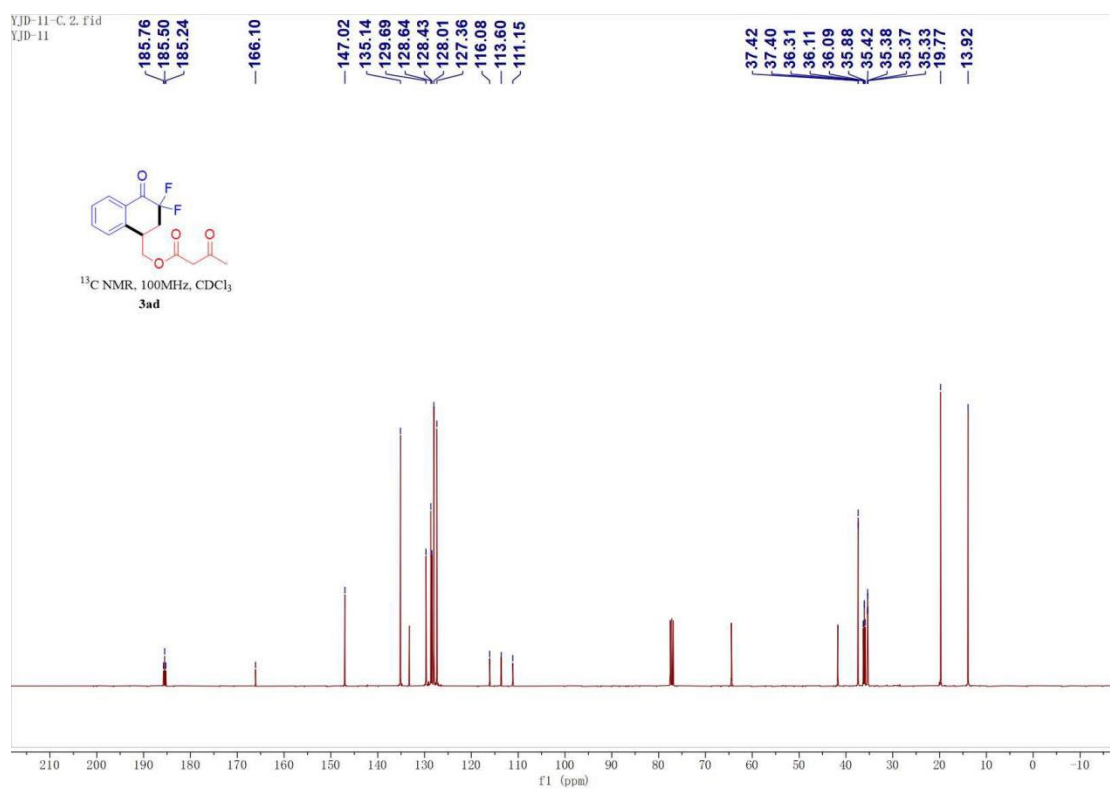

VJD-11-F.3.fid  
VJD-11-F

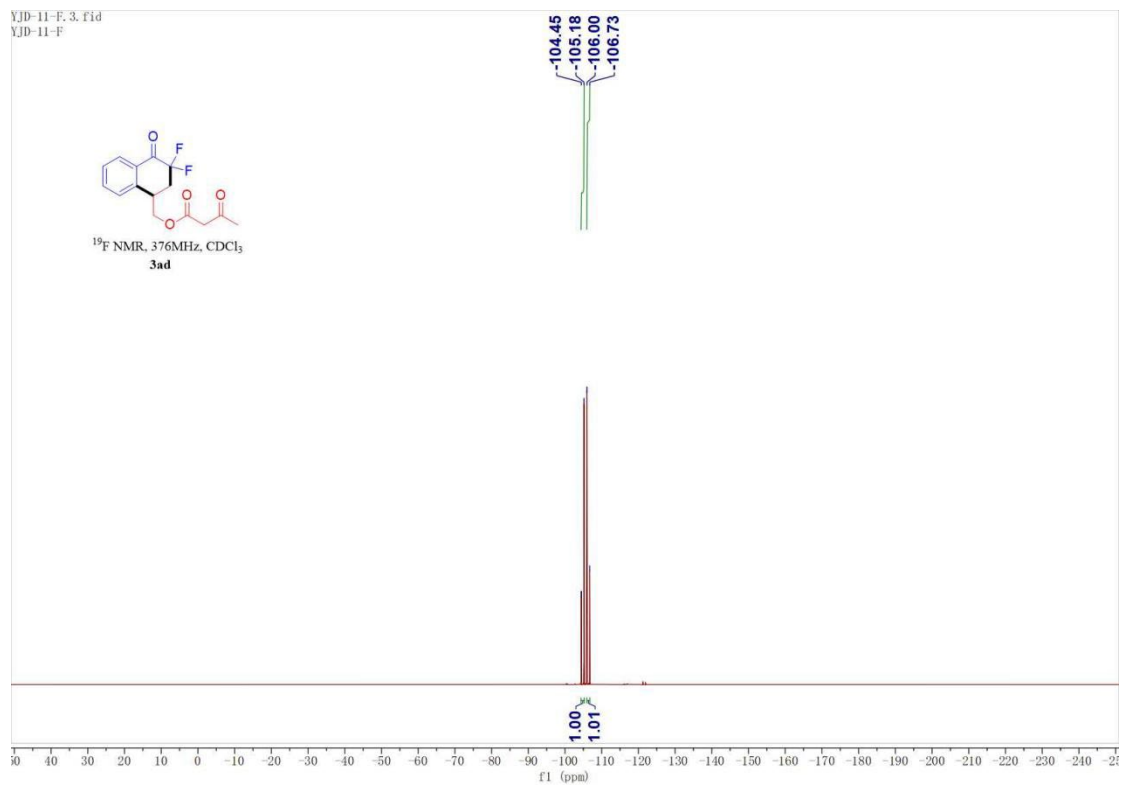

I-20.1.1.1r

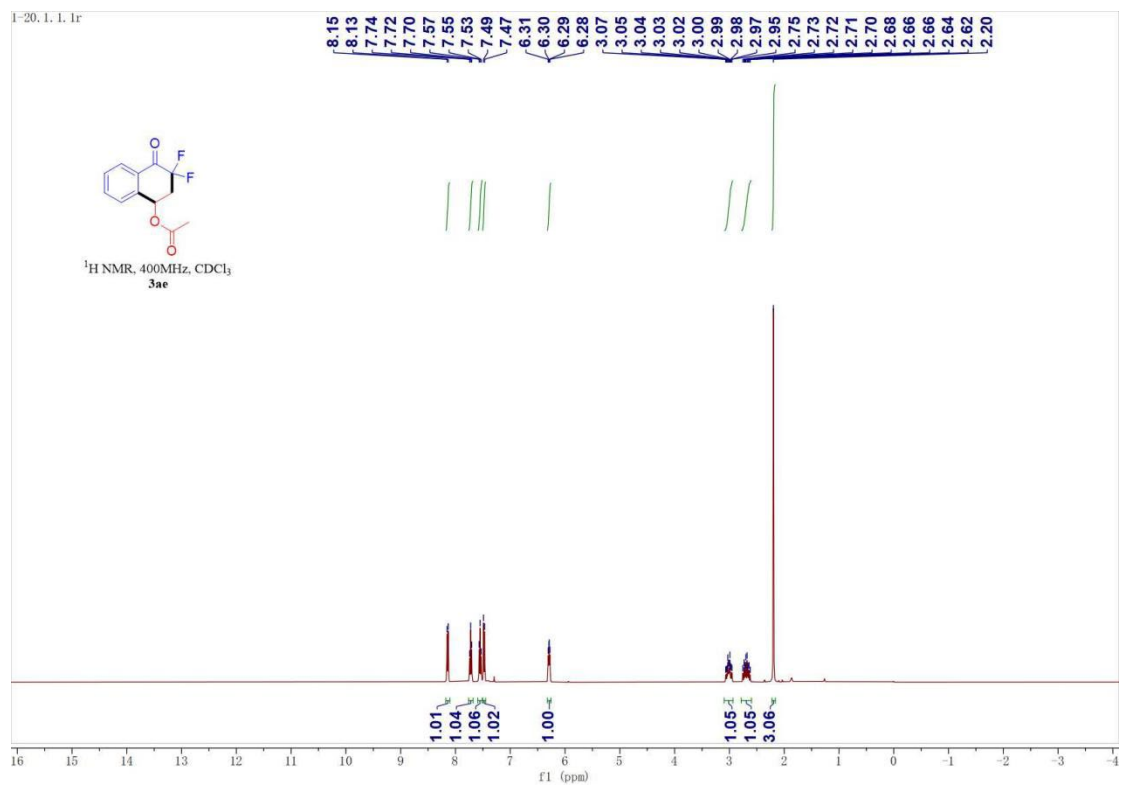

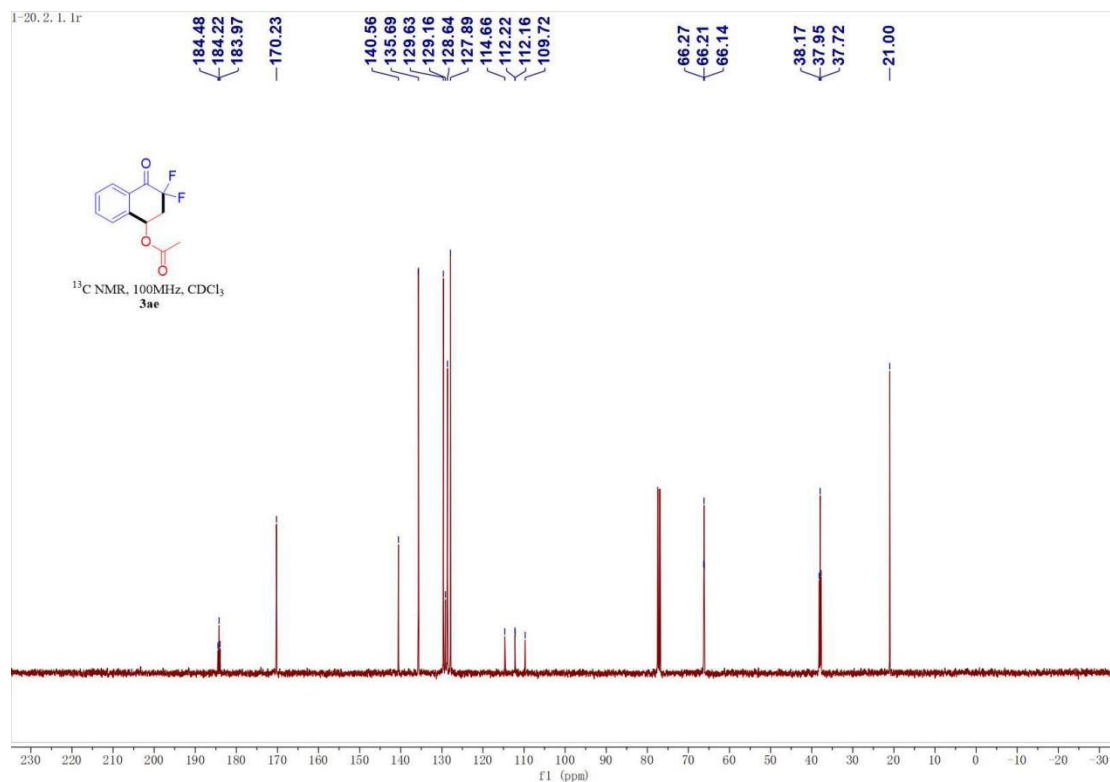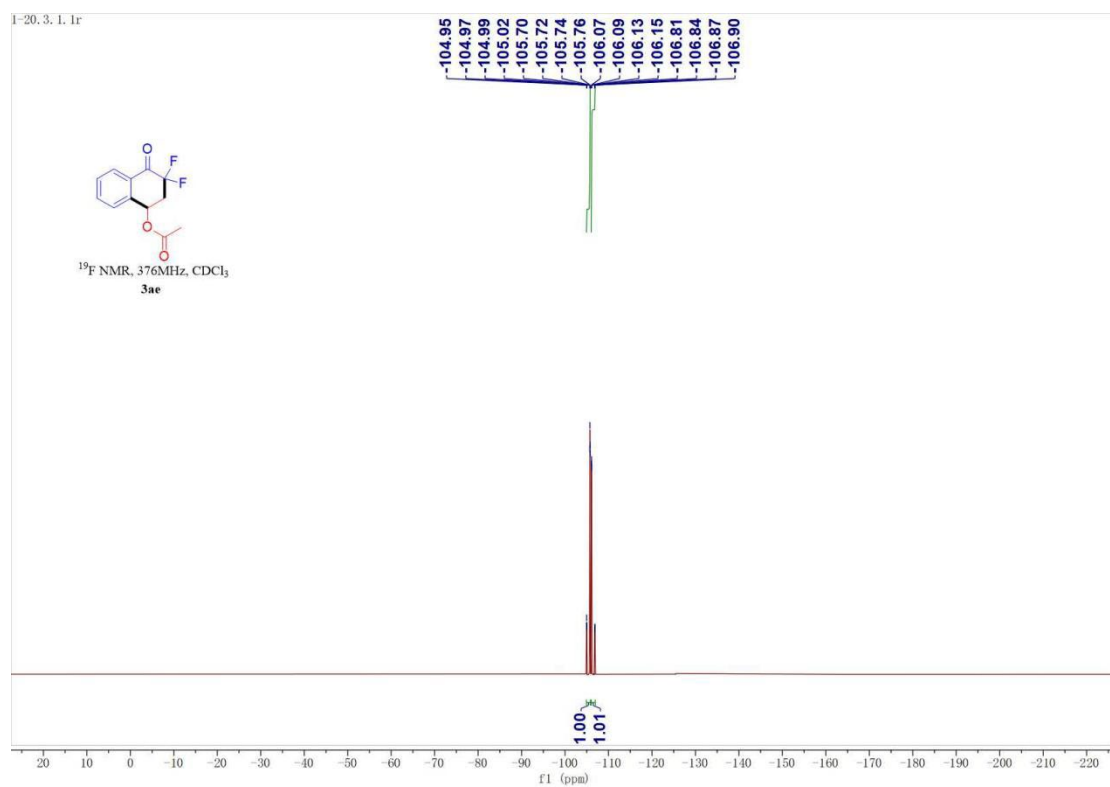

15. 1.1. 1r

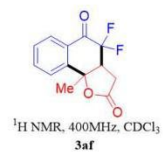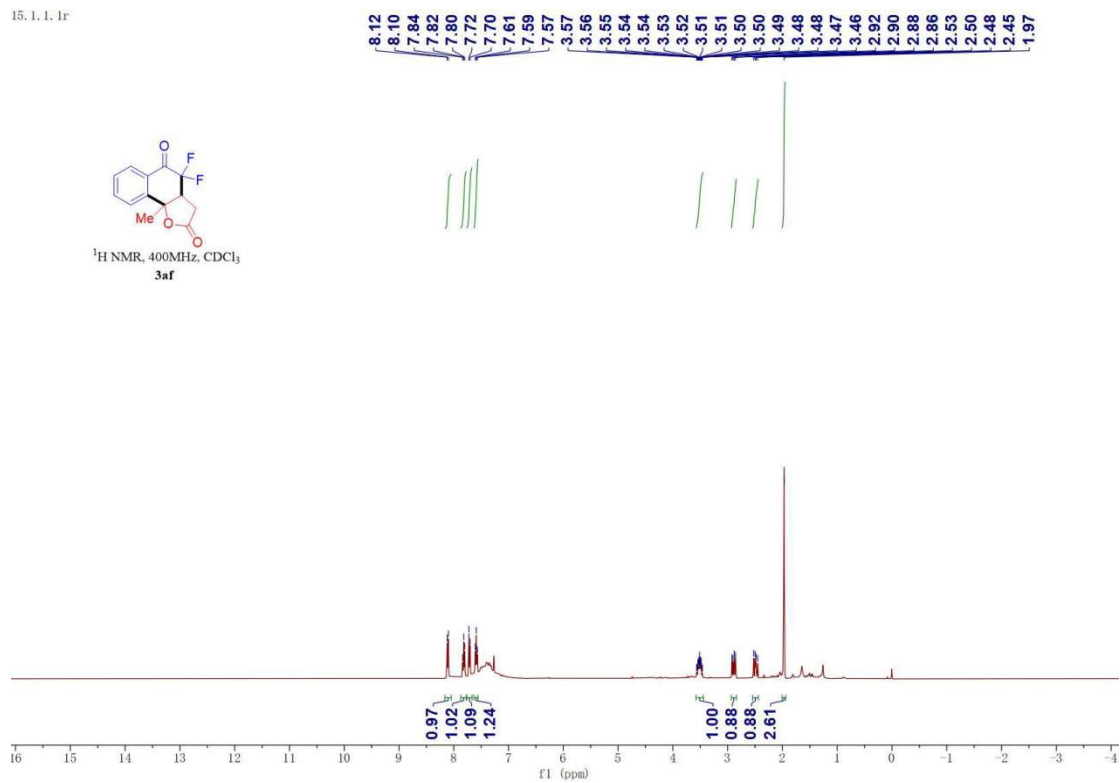

15. 2.1. 1r

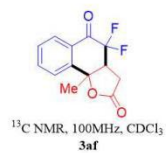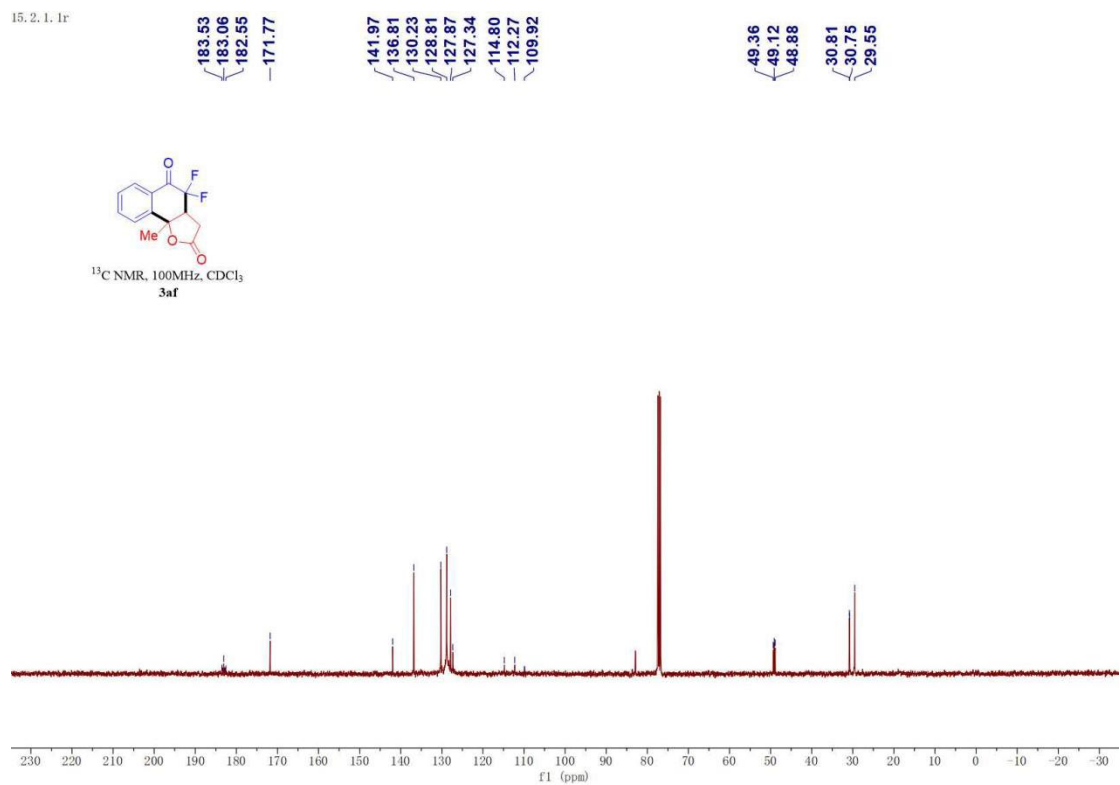

15.3.1.1r

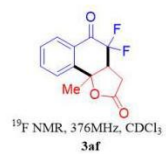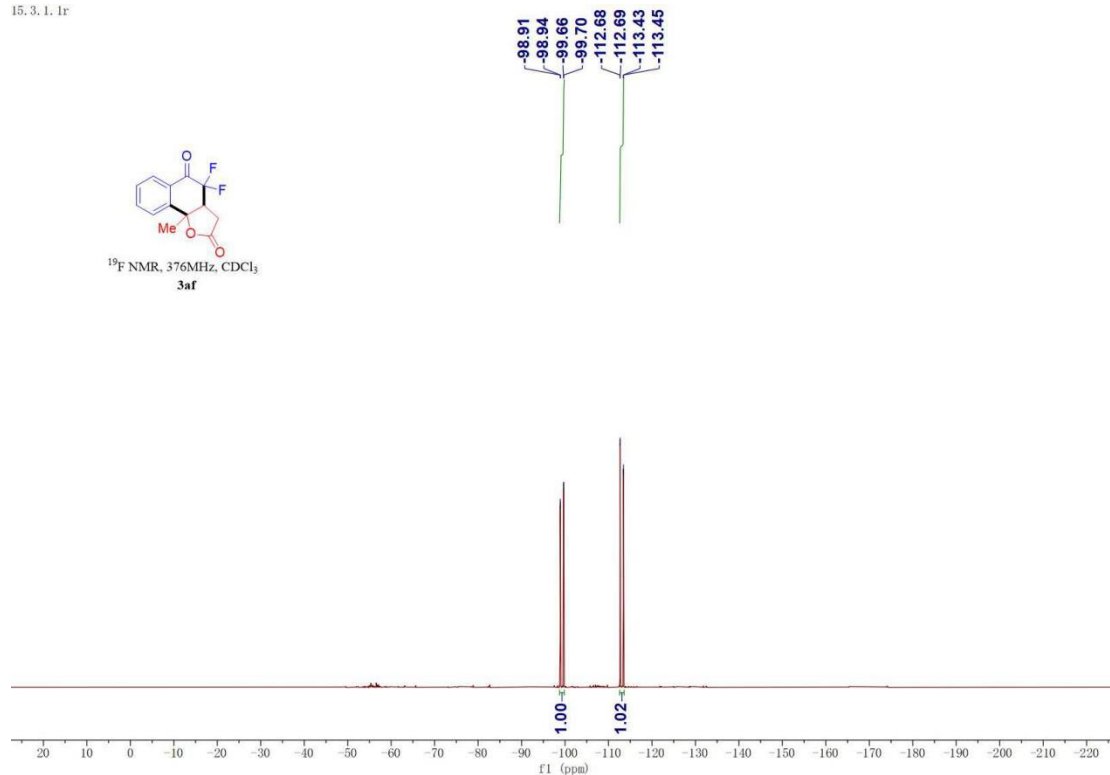

40.1.1.1r

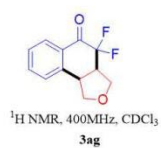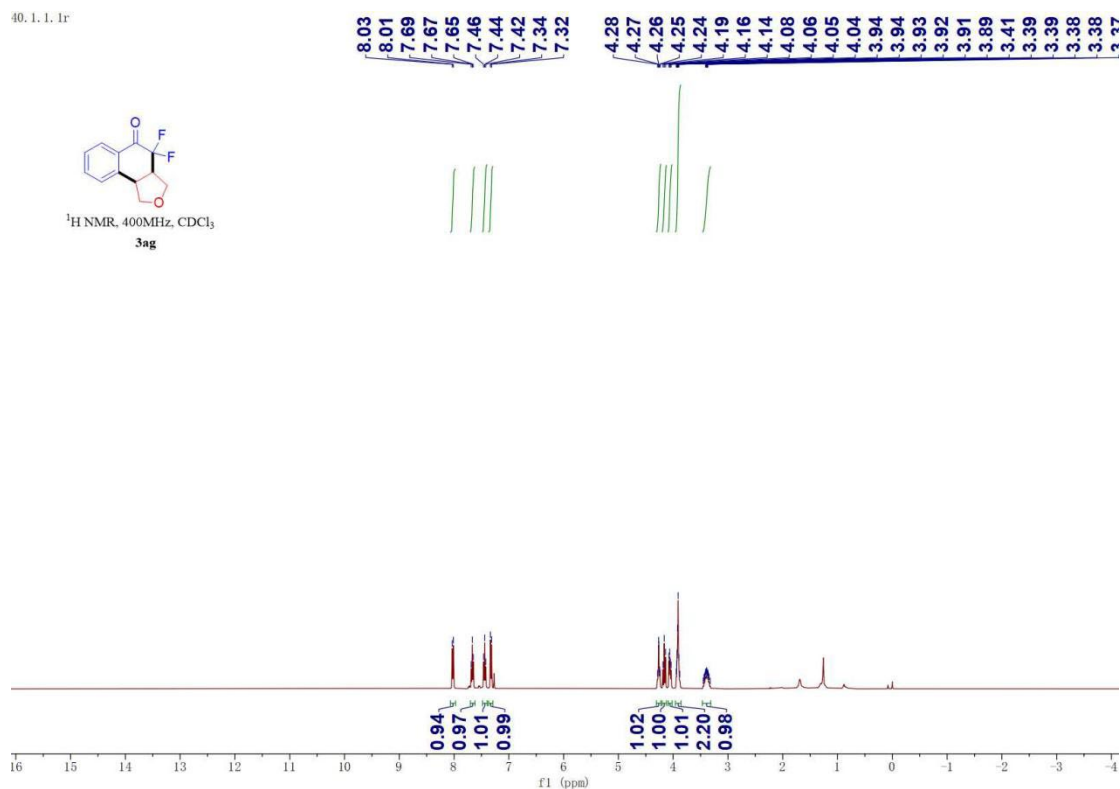



40. 2. 1. 1r

185.41  
185.15  
184.88

141.45  
135.66  
130.22  
129.04  
128.26  
128.05  
116.21  
113.74  
111.27

75.13  
66.55  
66.51  
66.47  
45.08  
44.86  
44.64  
42.22  
42.18  
42.15

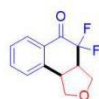

<sup>13</sup>C NMR, 100MHz, CDCl<sub>3</sub>  
**3ag**

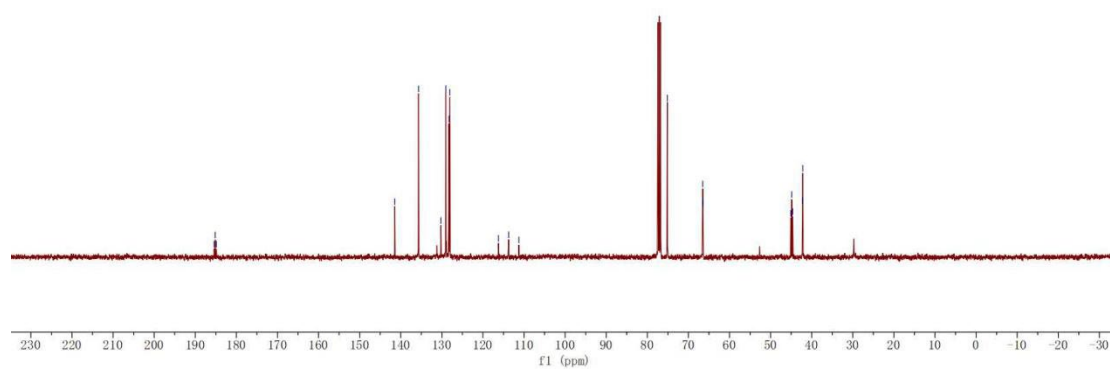

40. 3. 1. 1r

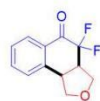

<sup>19</sup>F NMR, 376MHz, CDCl<sub>3</sub>  
**3ag**

-103.82  
-103.85  
-104.54  
-104.57  
-113.03  
-113.07  
-113.74  
-113.79

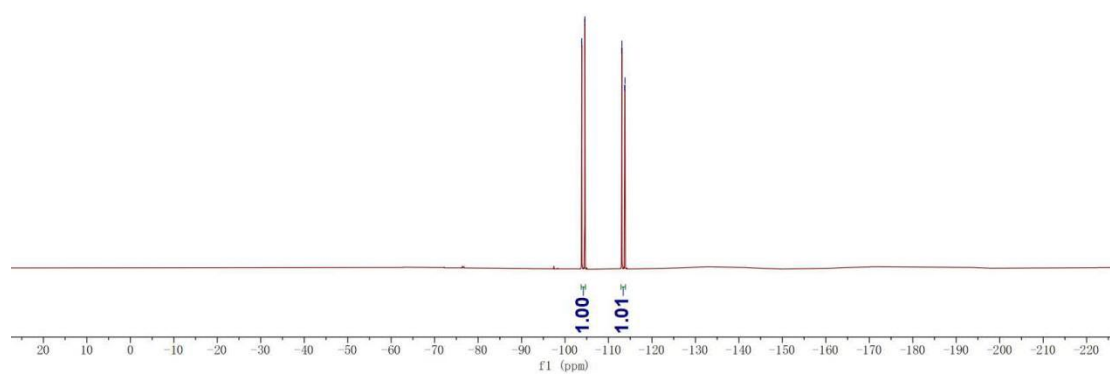

3.20-2-12.1.1.1r

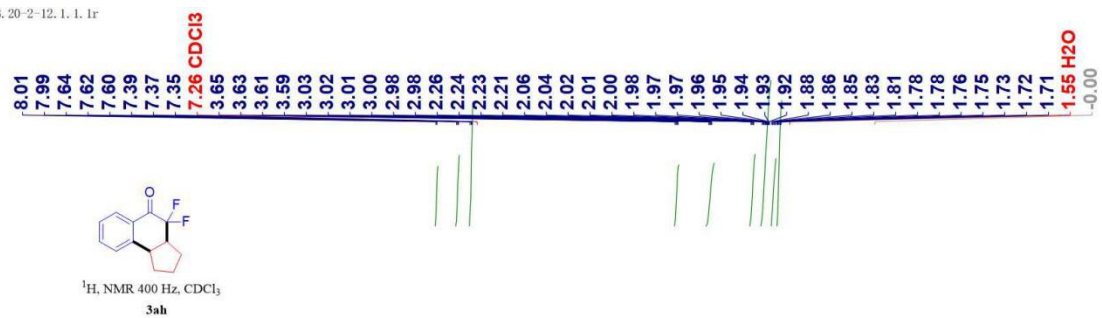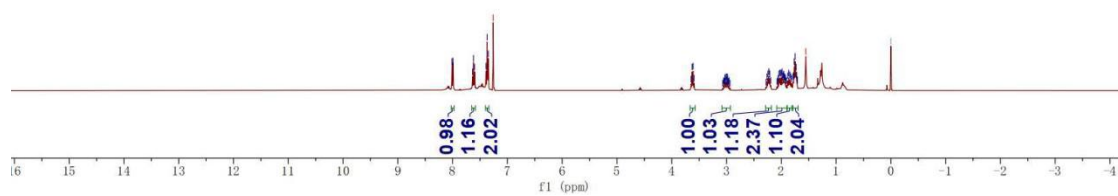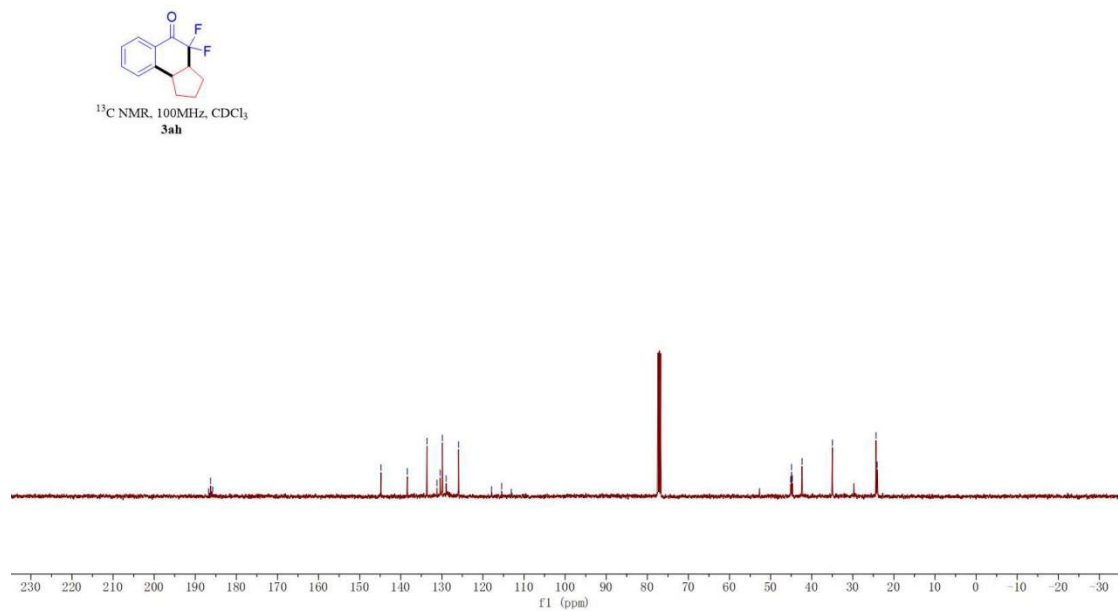

3.20-2-12.3.1.1r

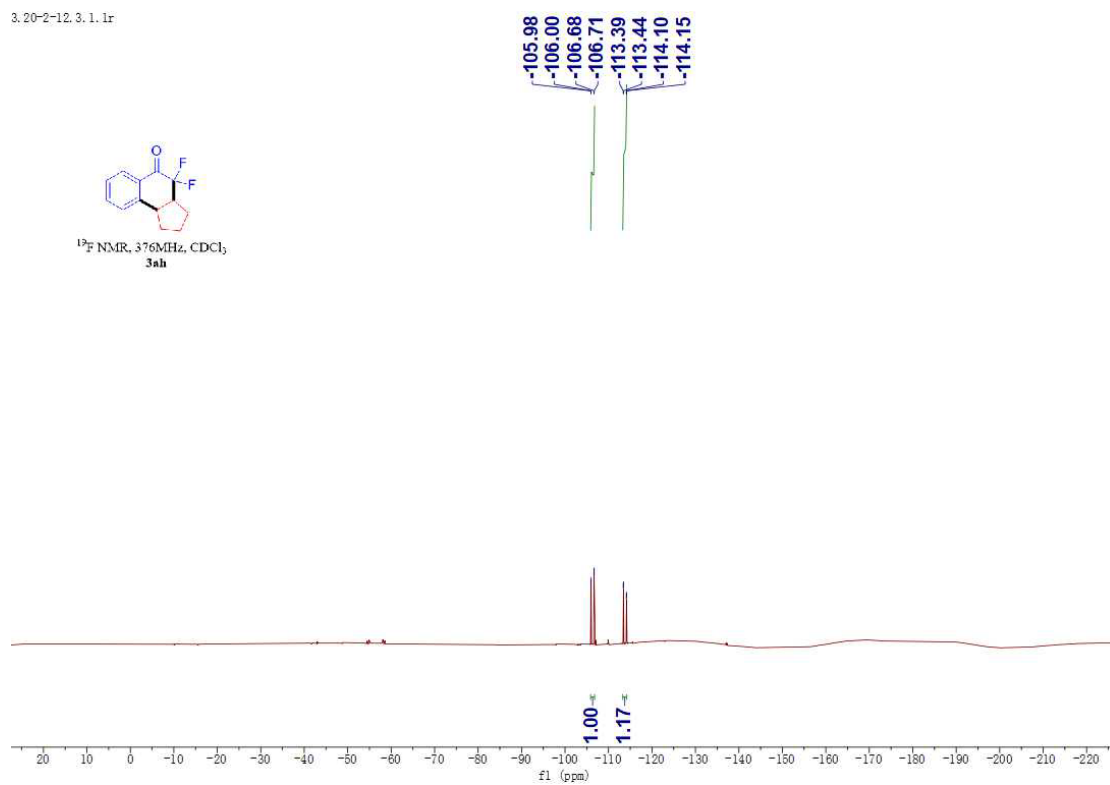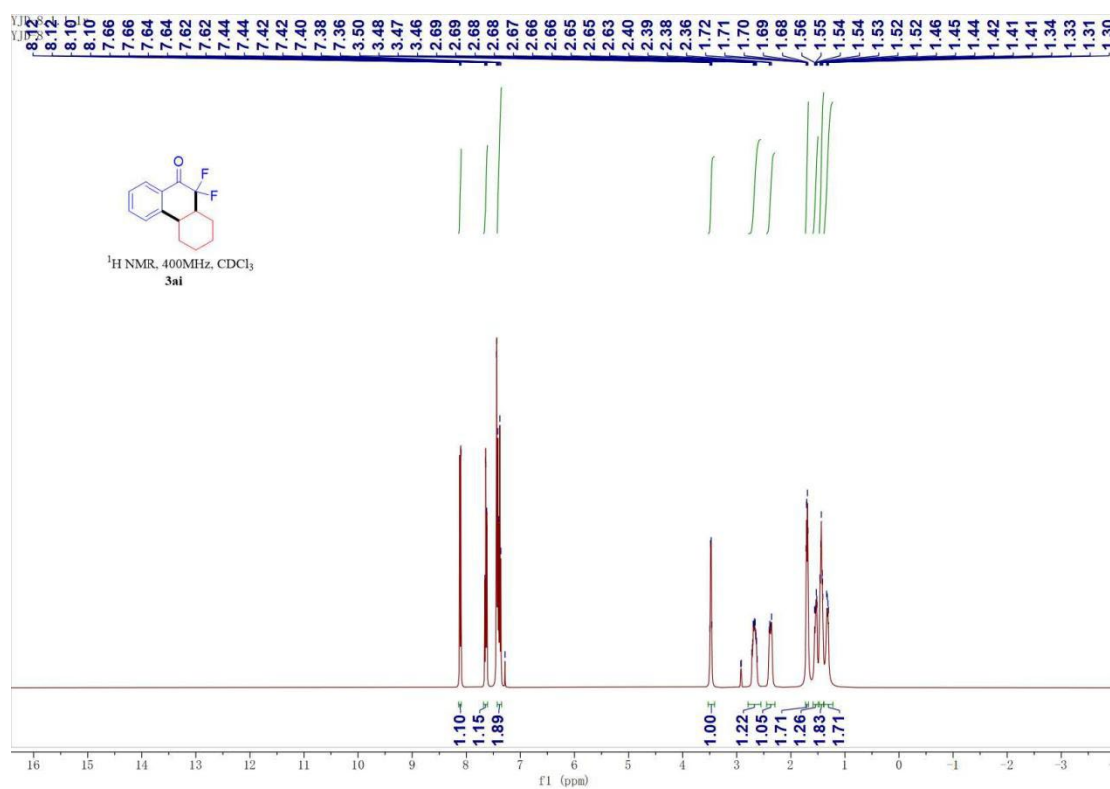

YD-8-C.9.1.1r  
YD-8-C

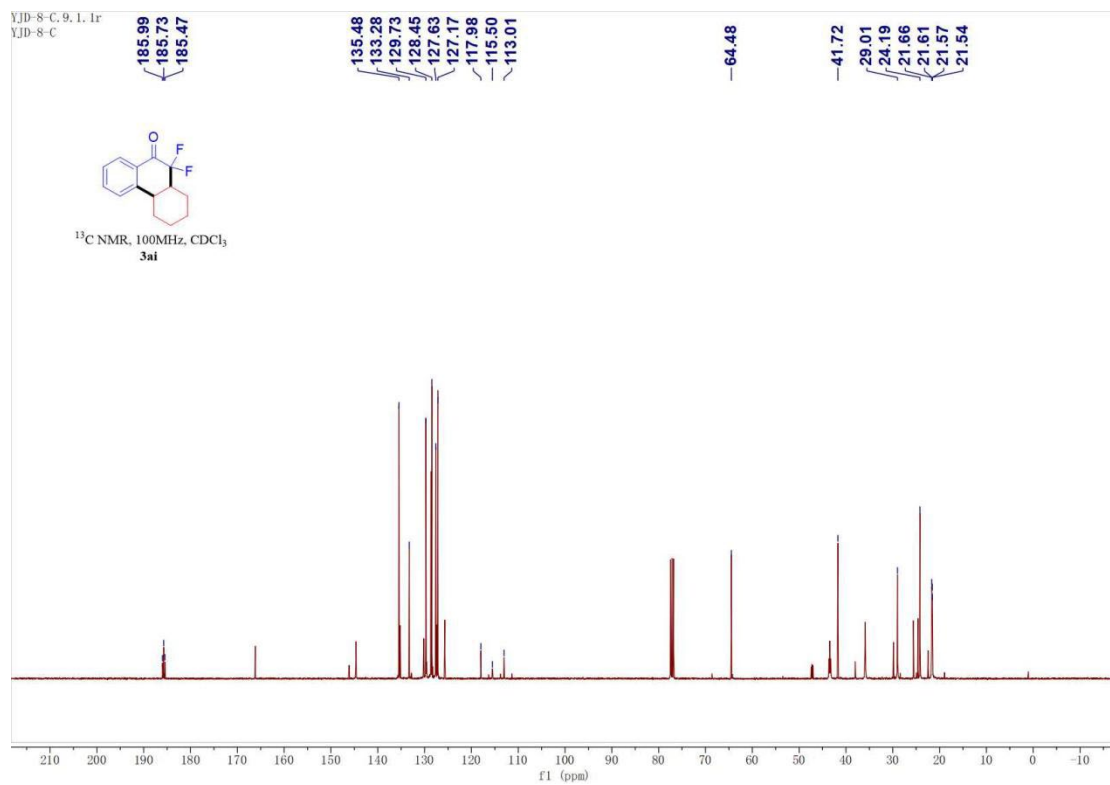

I-1-F.10. f1d

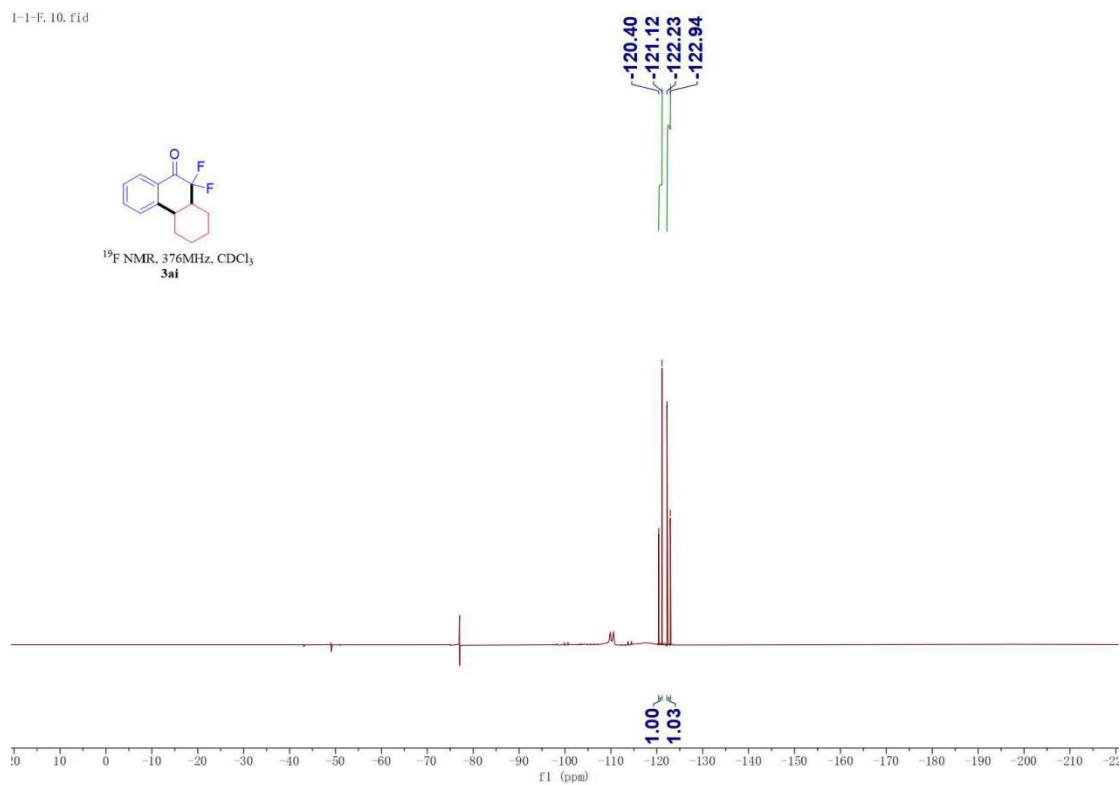

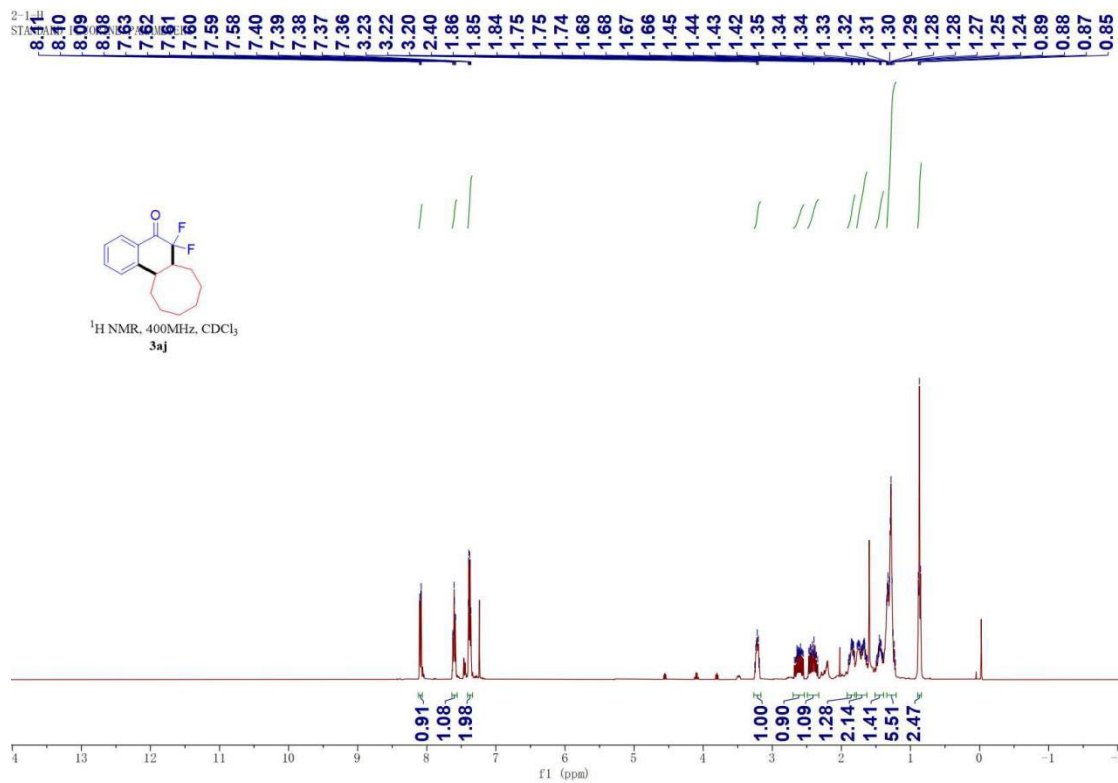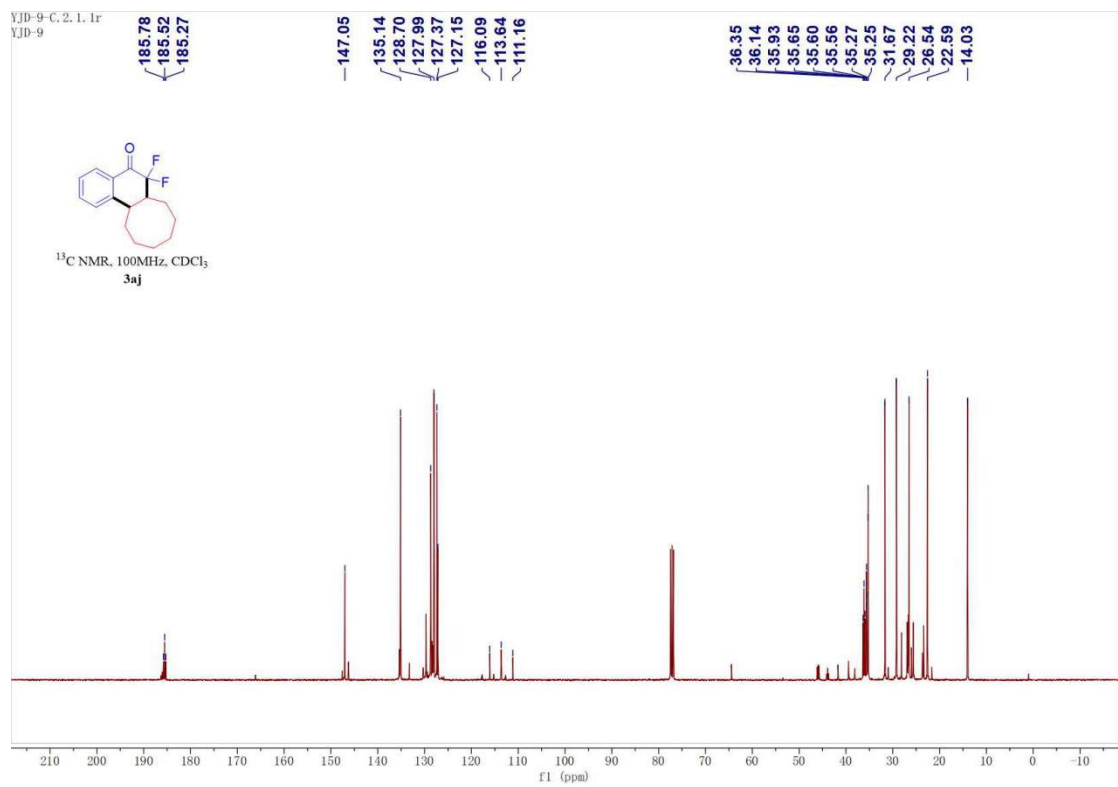

YJD-9-F.3.1.1r  
YJD-9-F

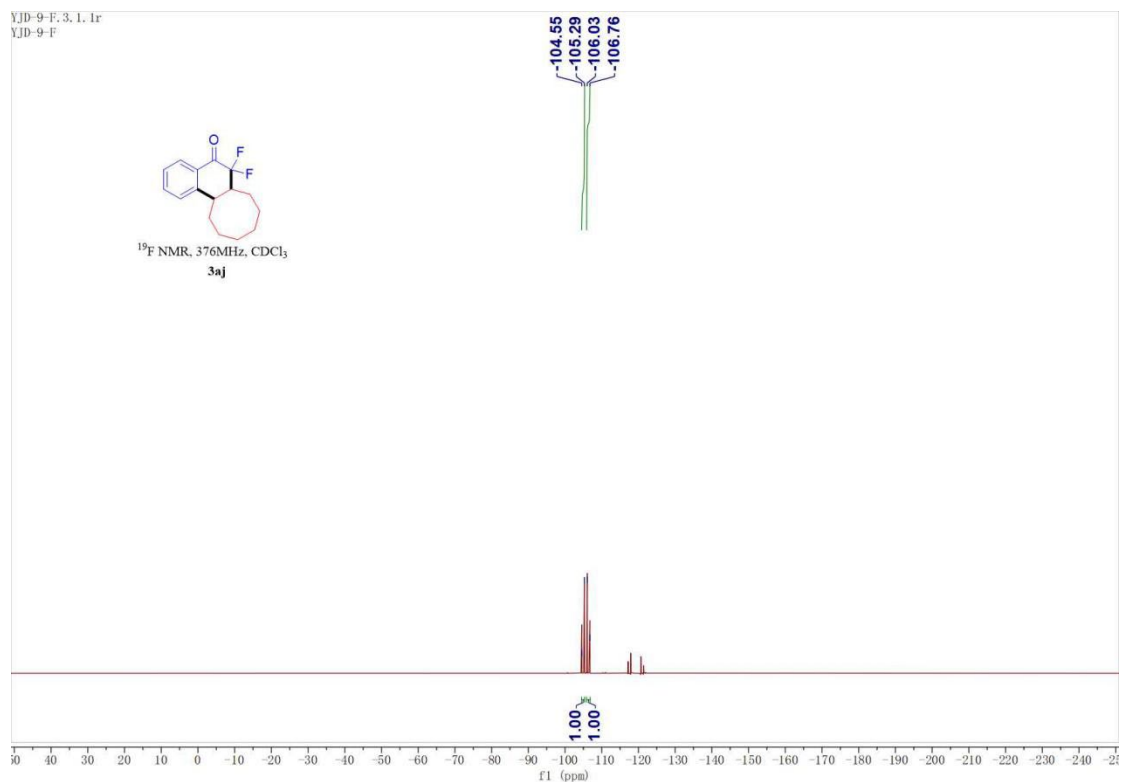

13.1.1.1r

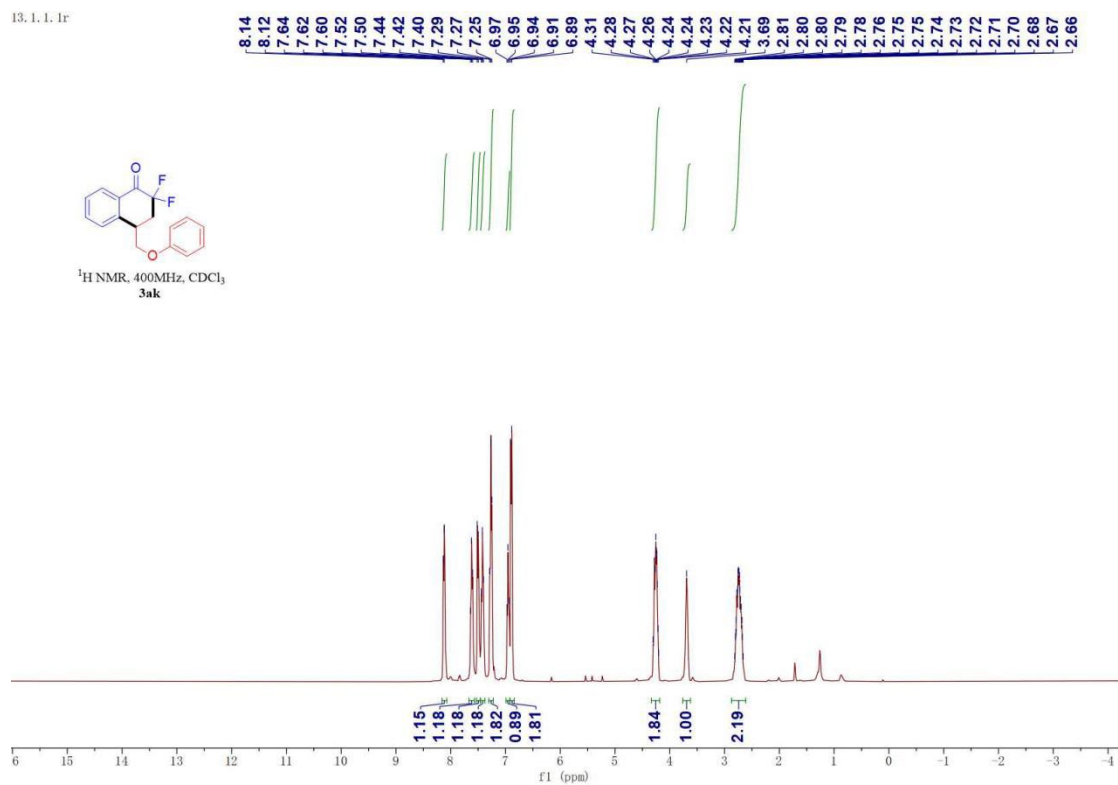

13.2.2. 1. 1r

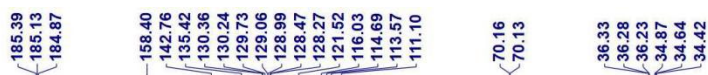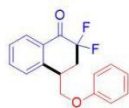

<sup>13</sup>C NMR, 100MHz, CDCl<sub>3</sub>  
**3ak**

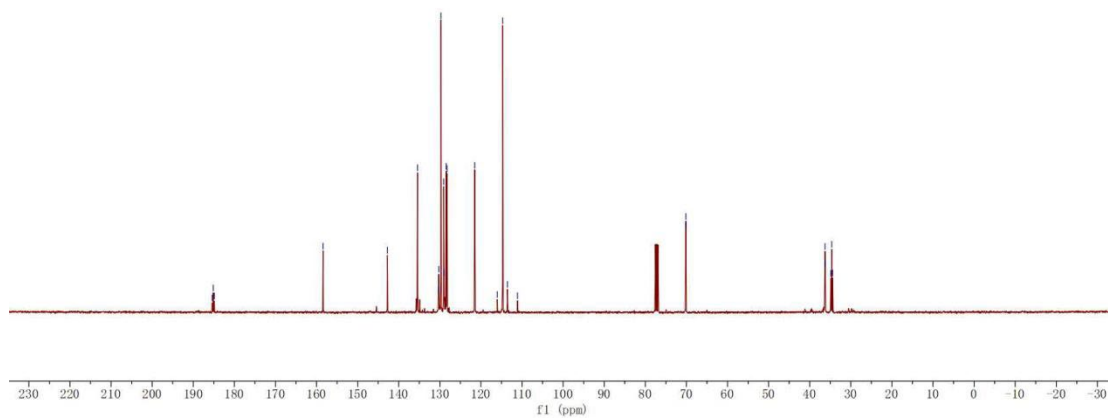

13.3.3. 1. 1r

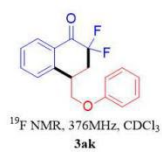

<sup>19</sup>F NMR, 376MHz, CDCl<sub>3</sub>  
**3ak**

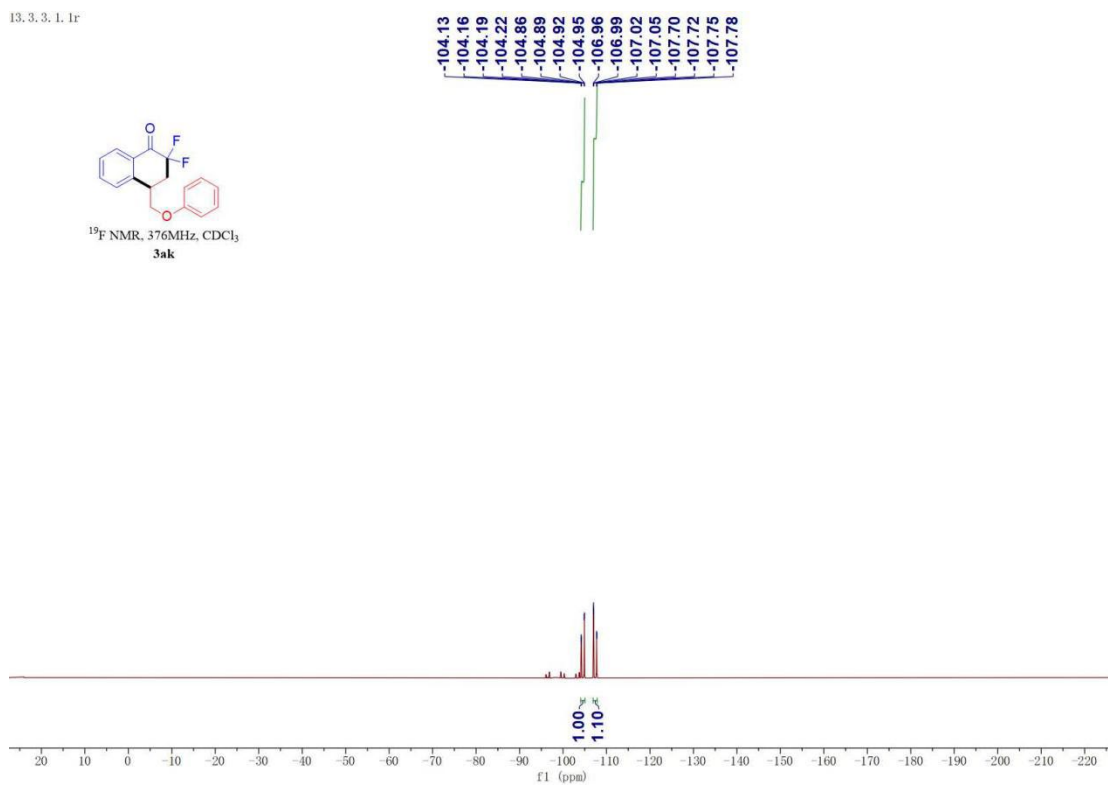

38. 1. 1. 1r

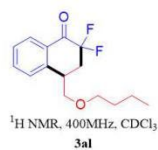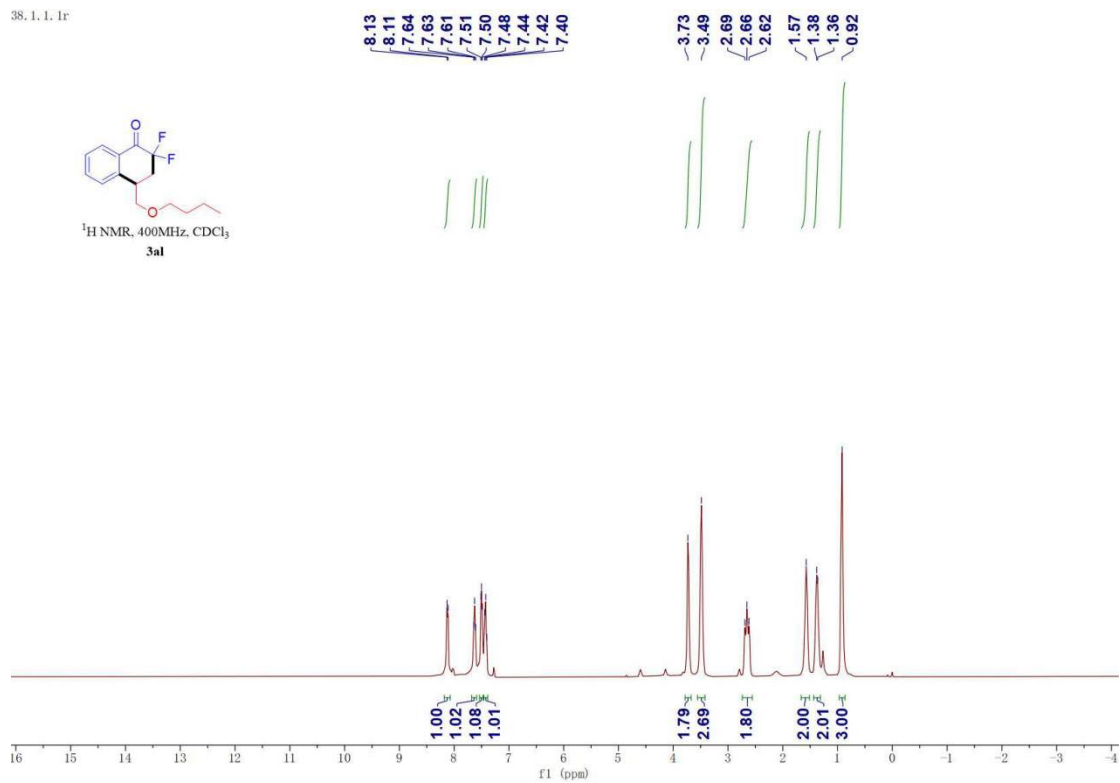

38. 2. 1. 1r

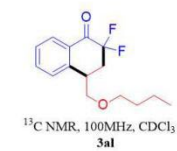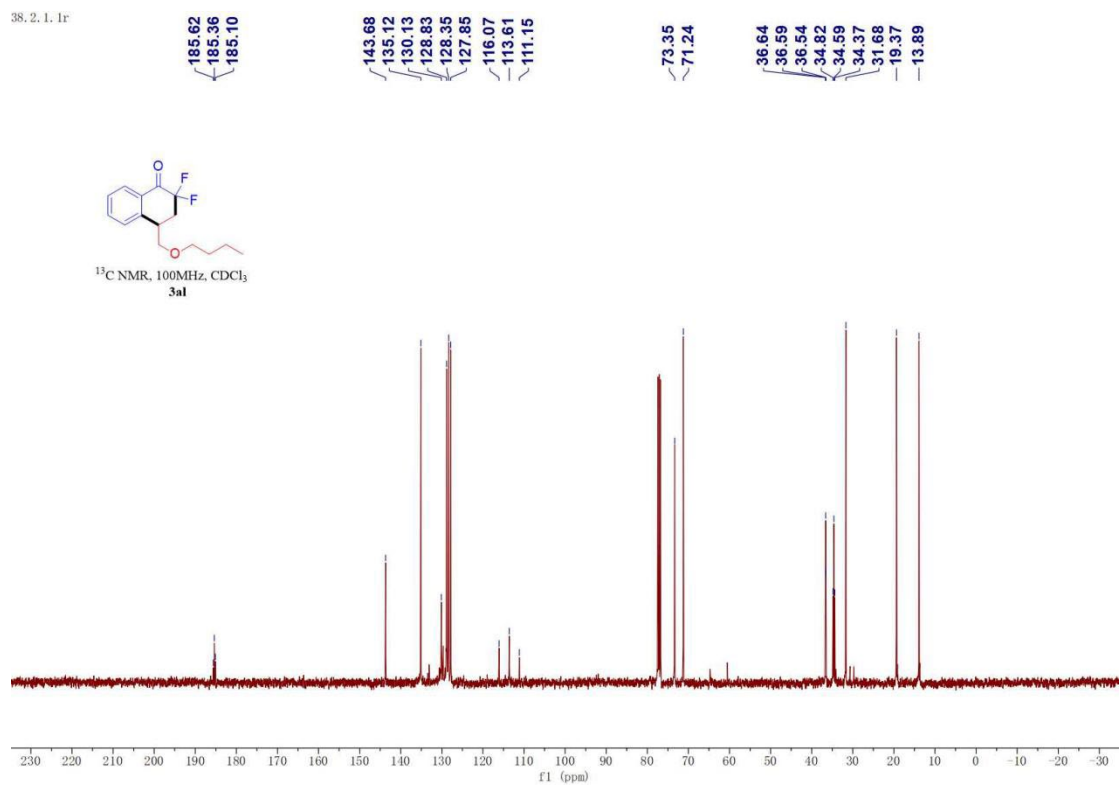



38.3.1.1r

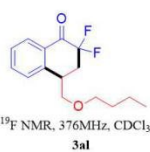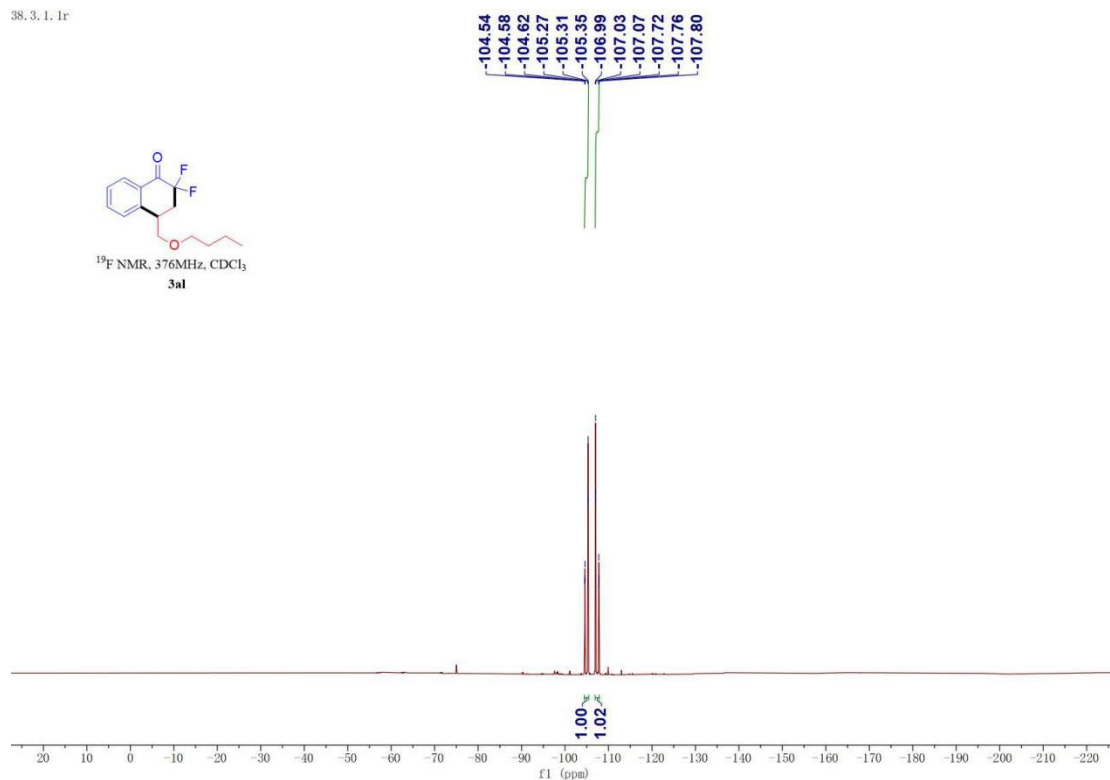

1-4.1.1.1r

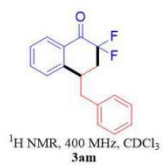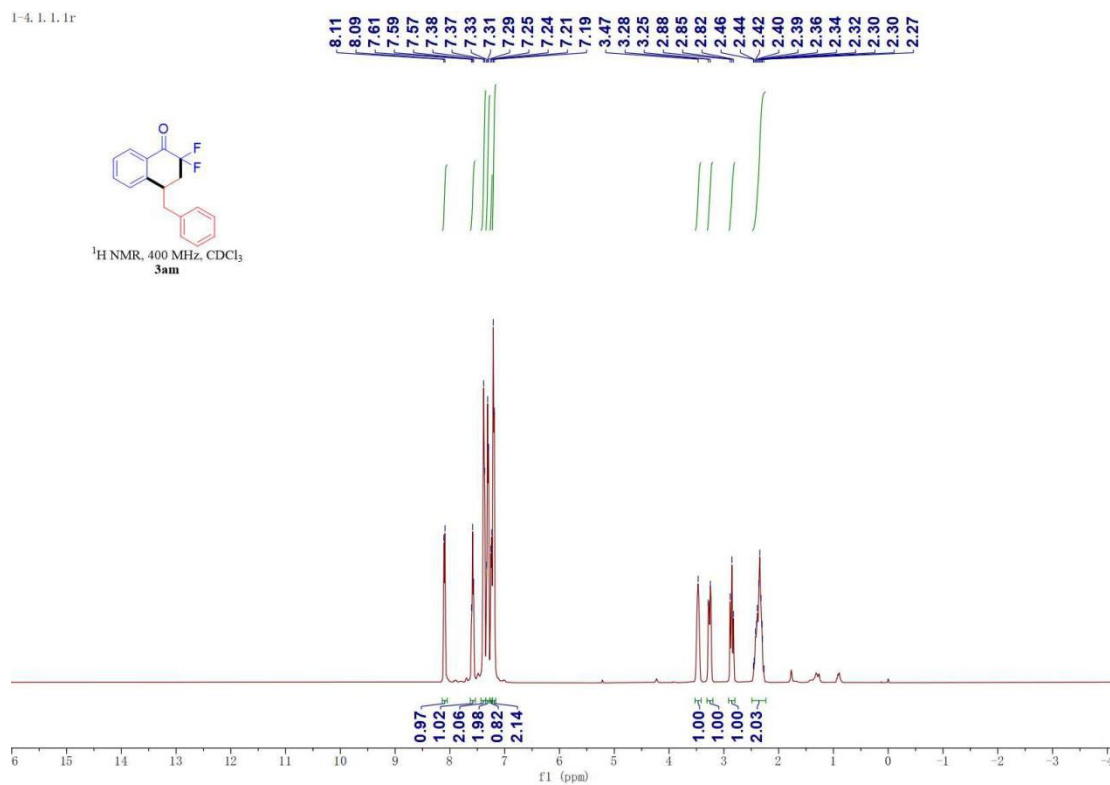

I-4.2.1.1f

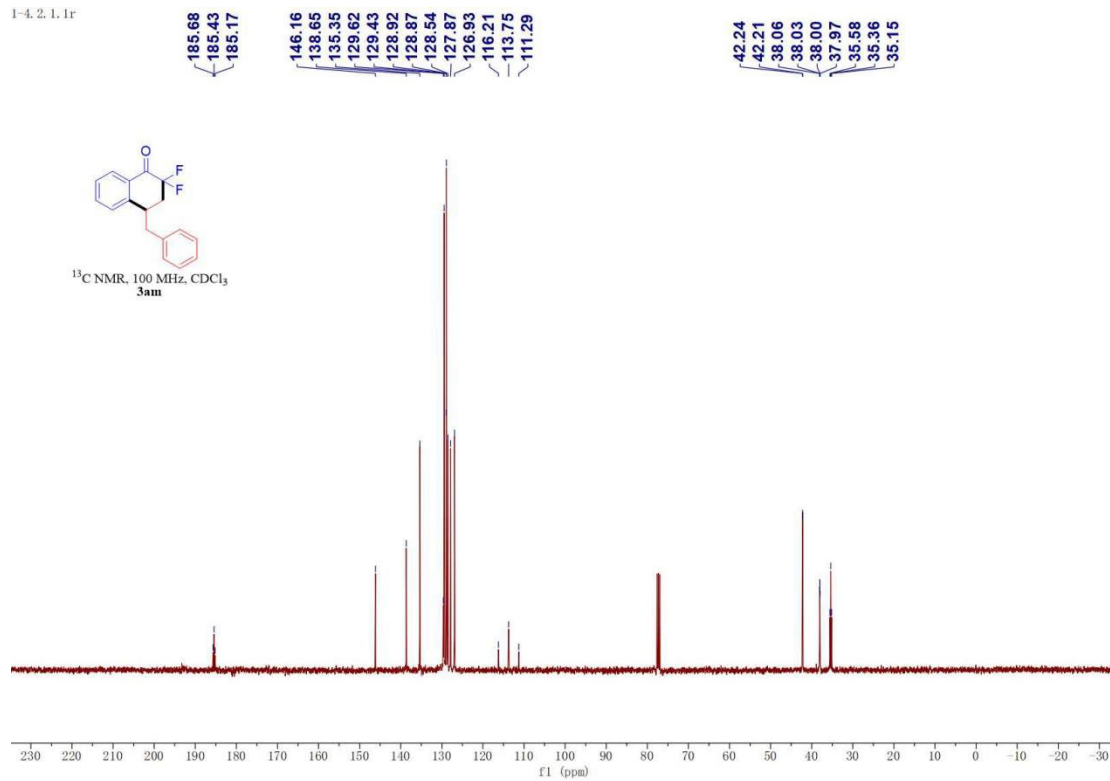

I-4.3.1.1f

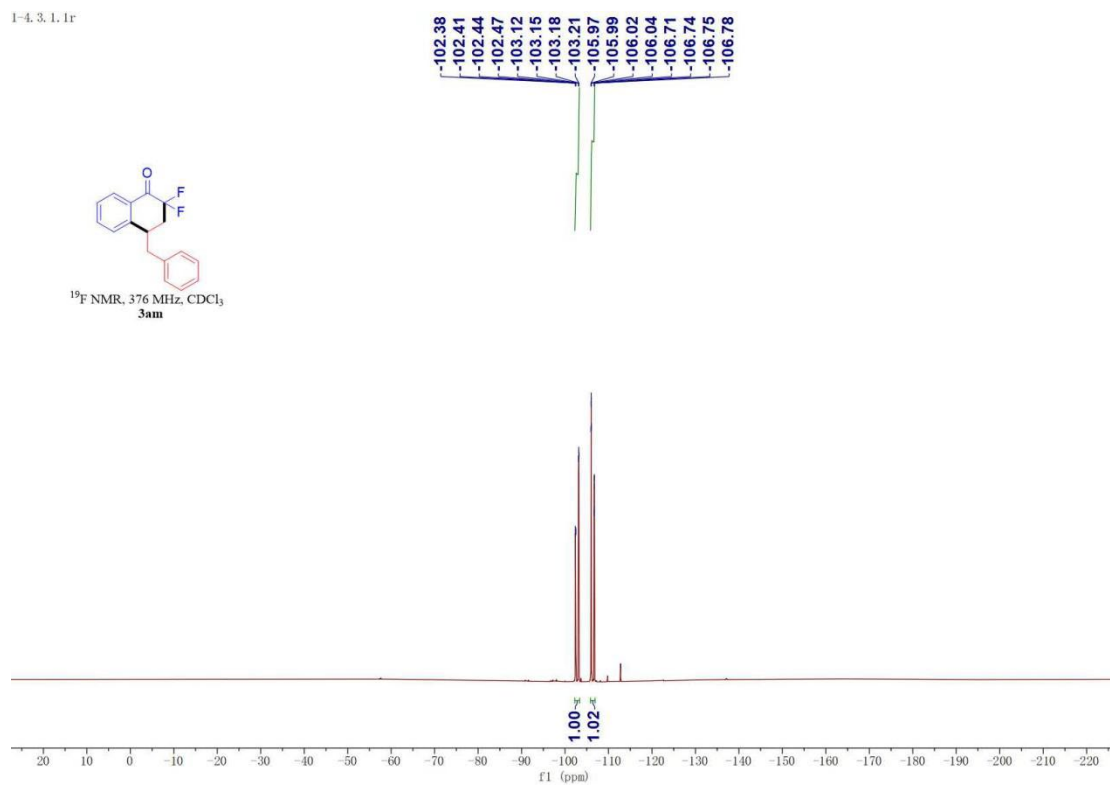

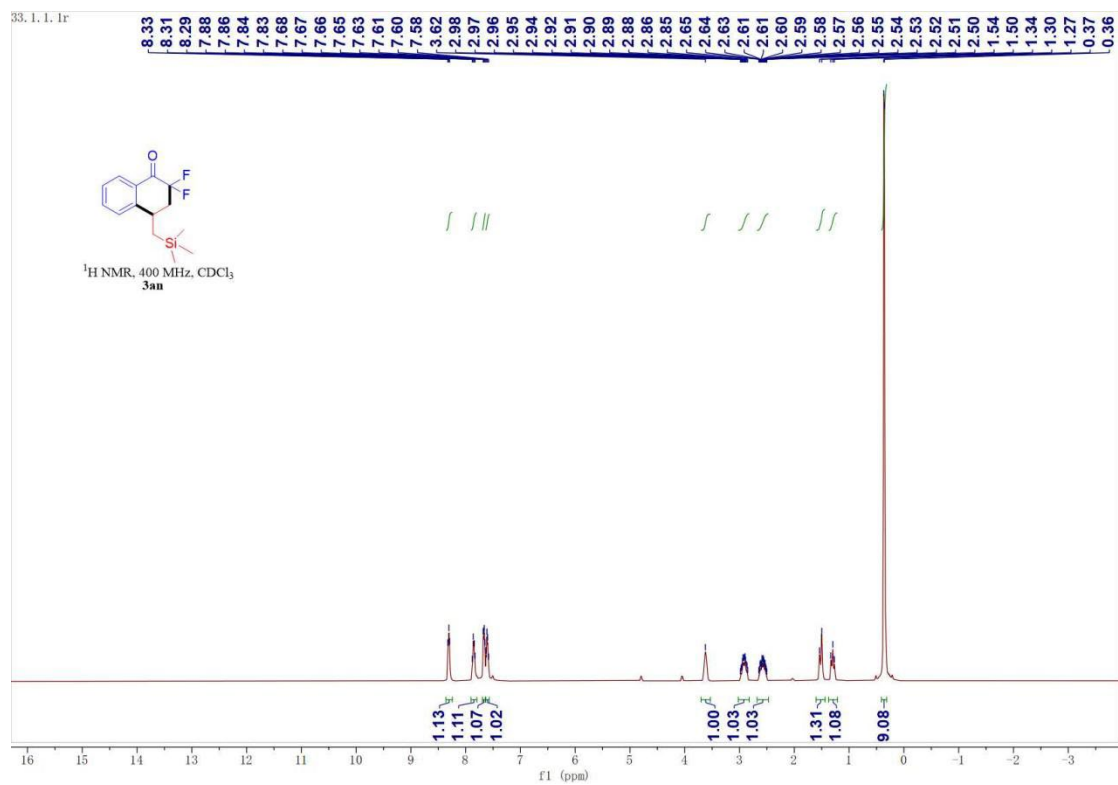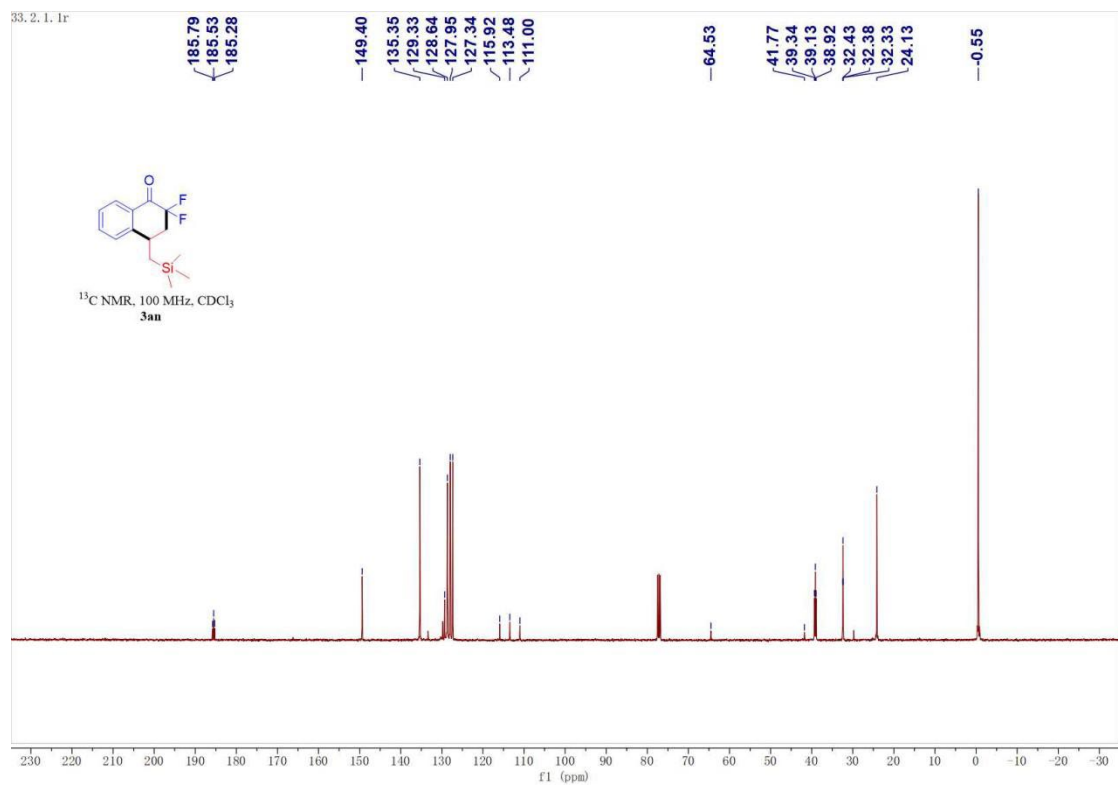

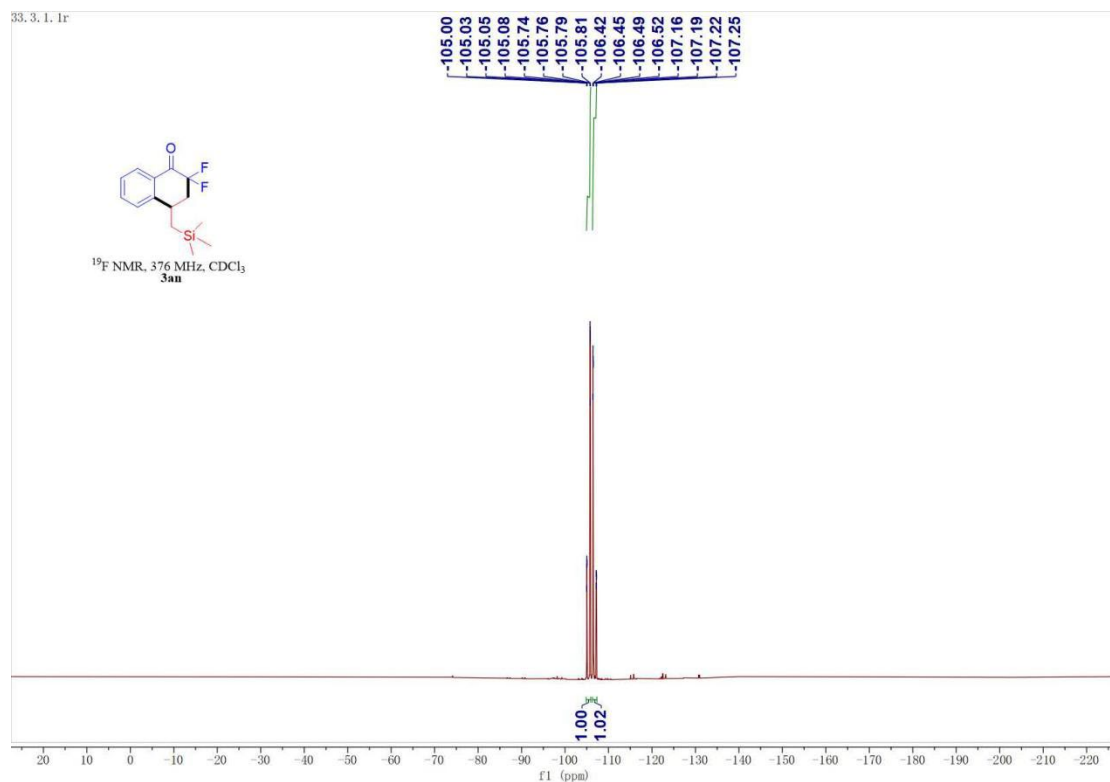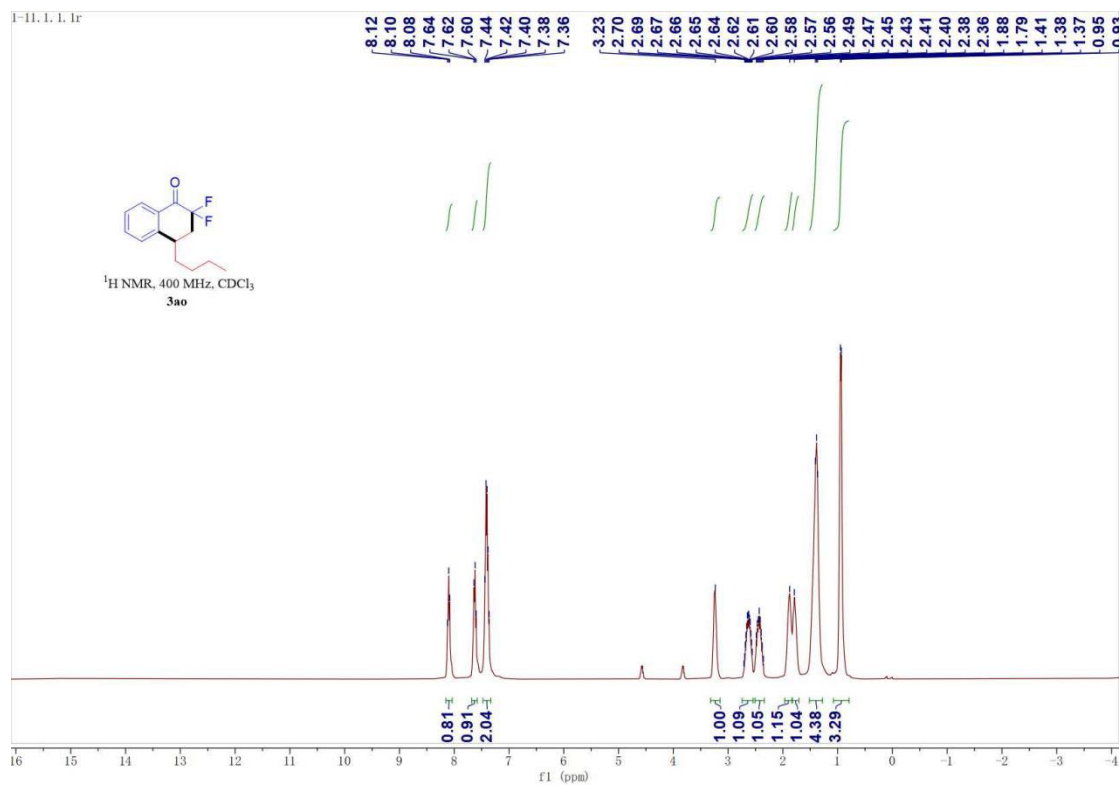

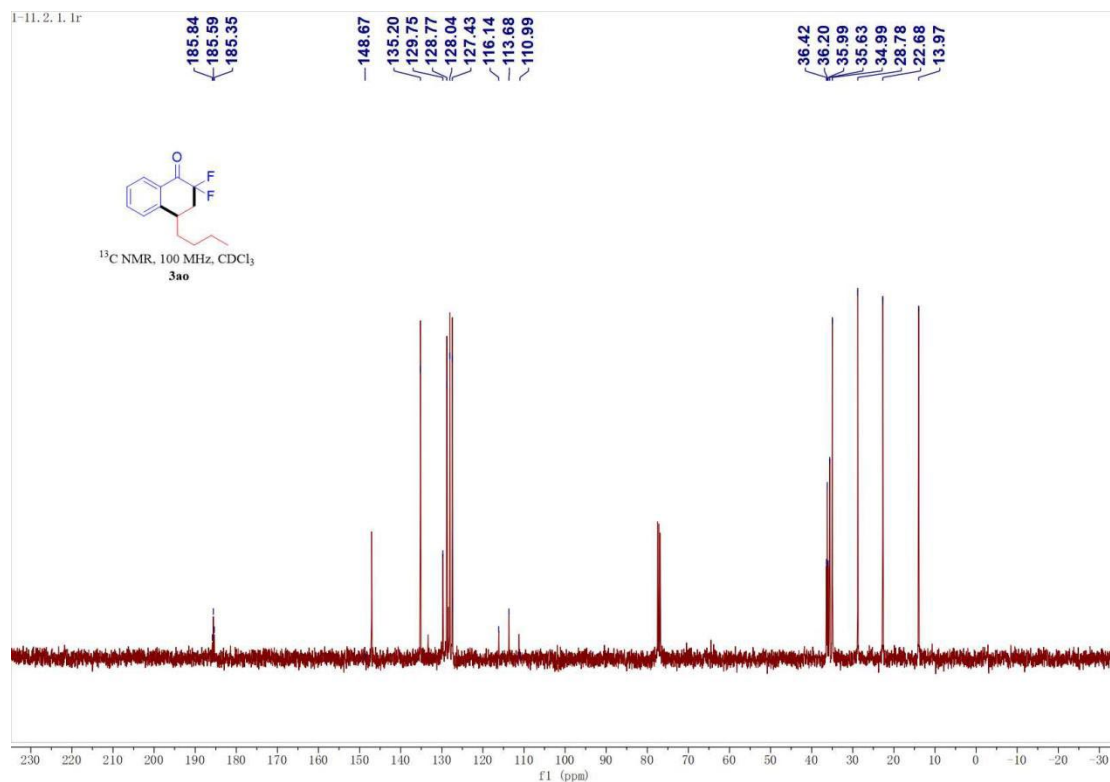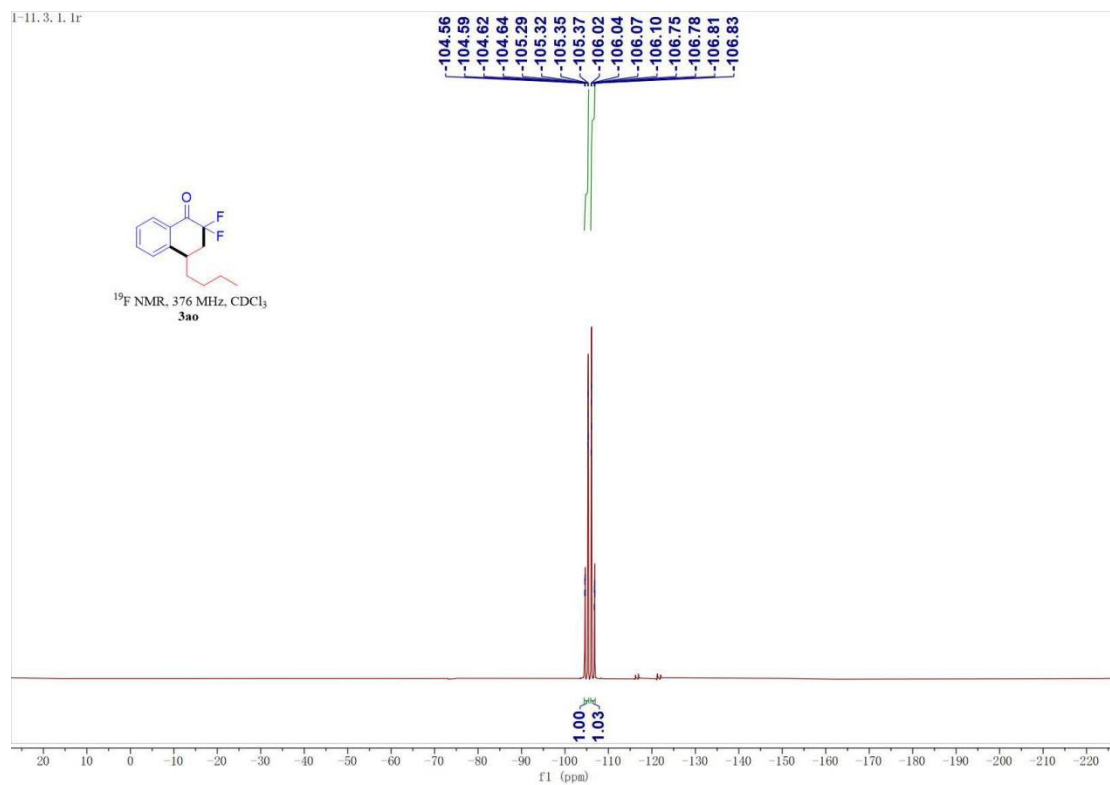

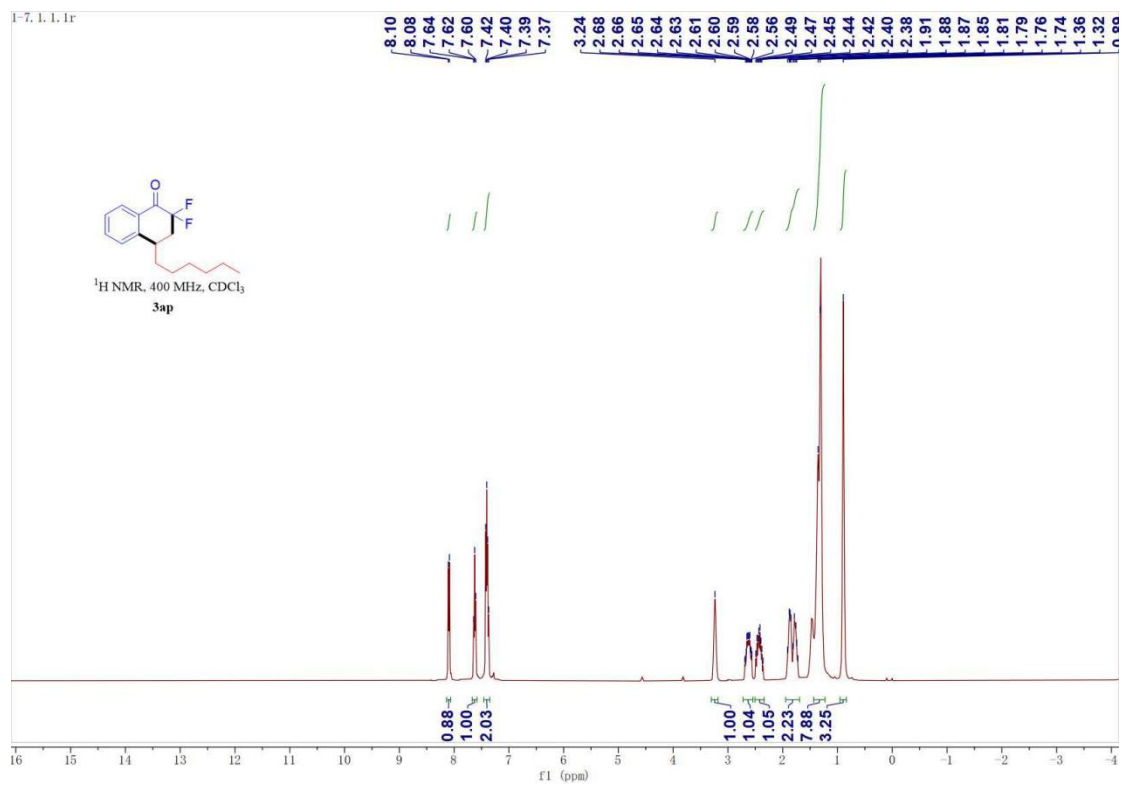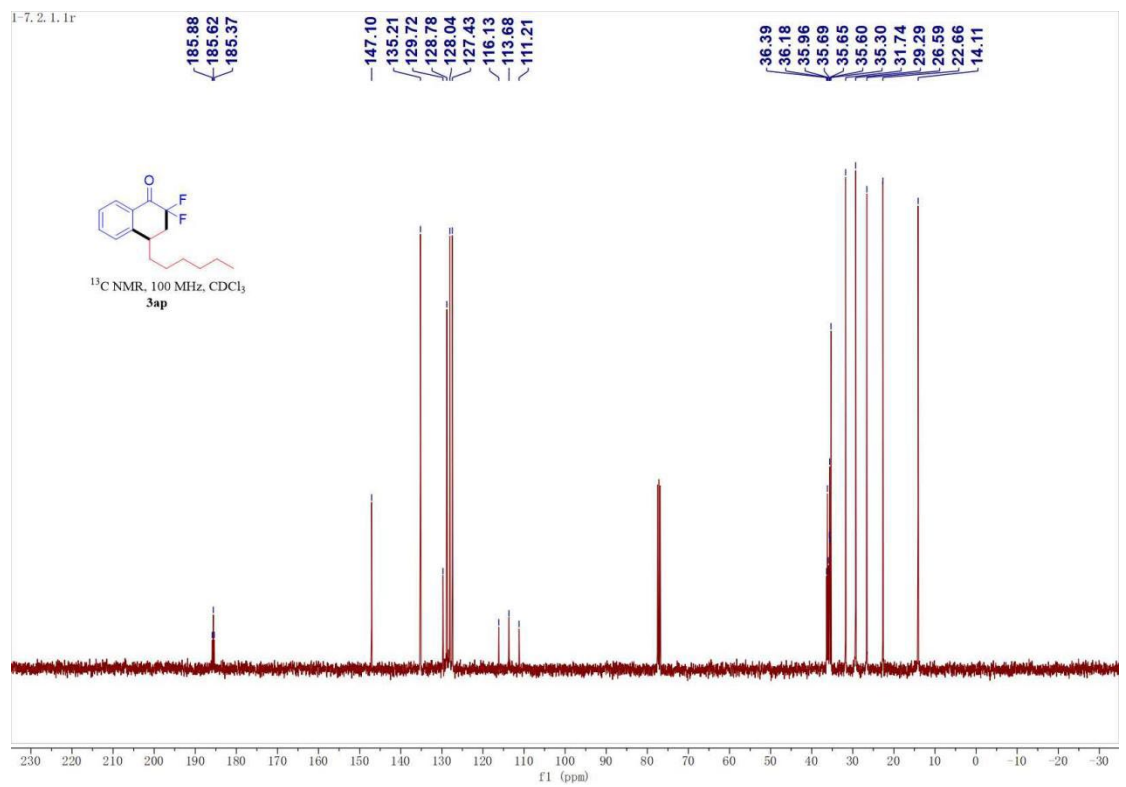

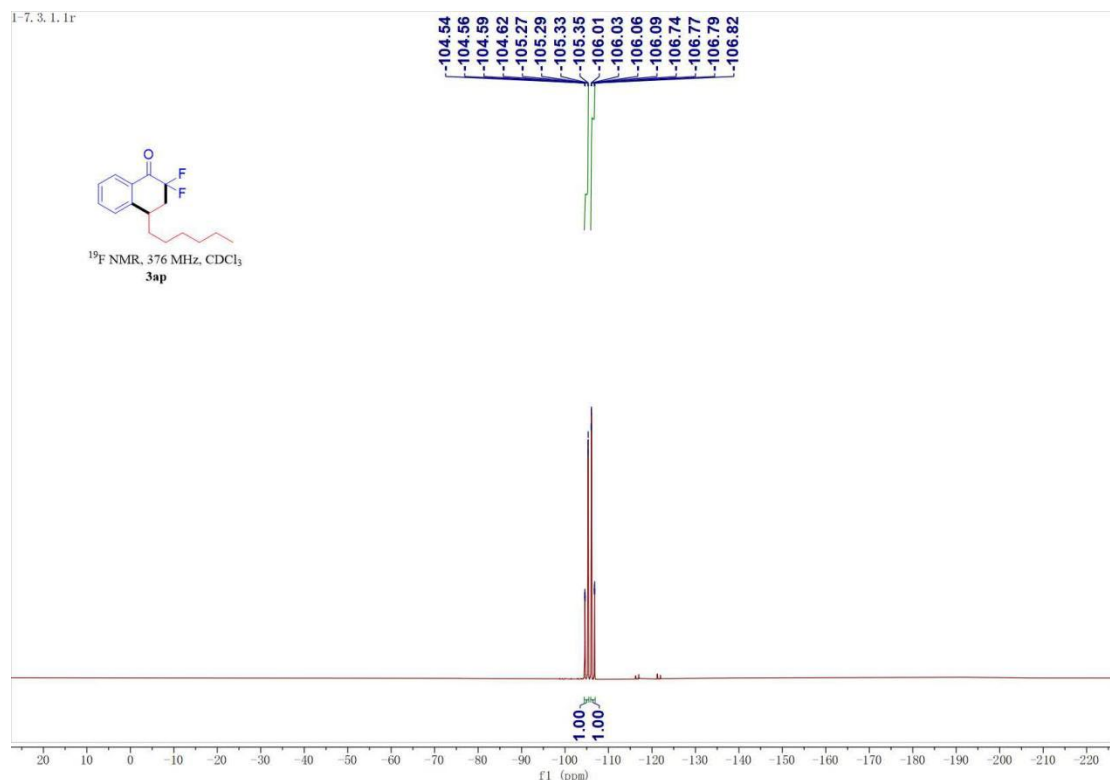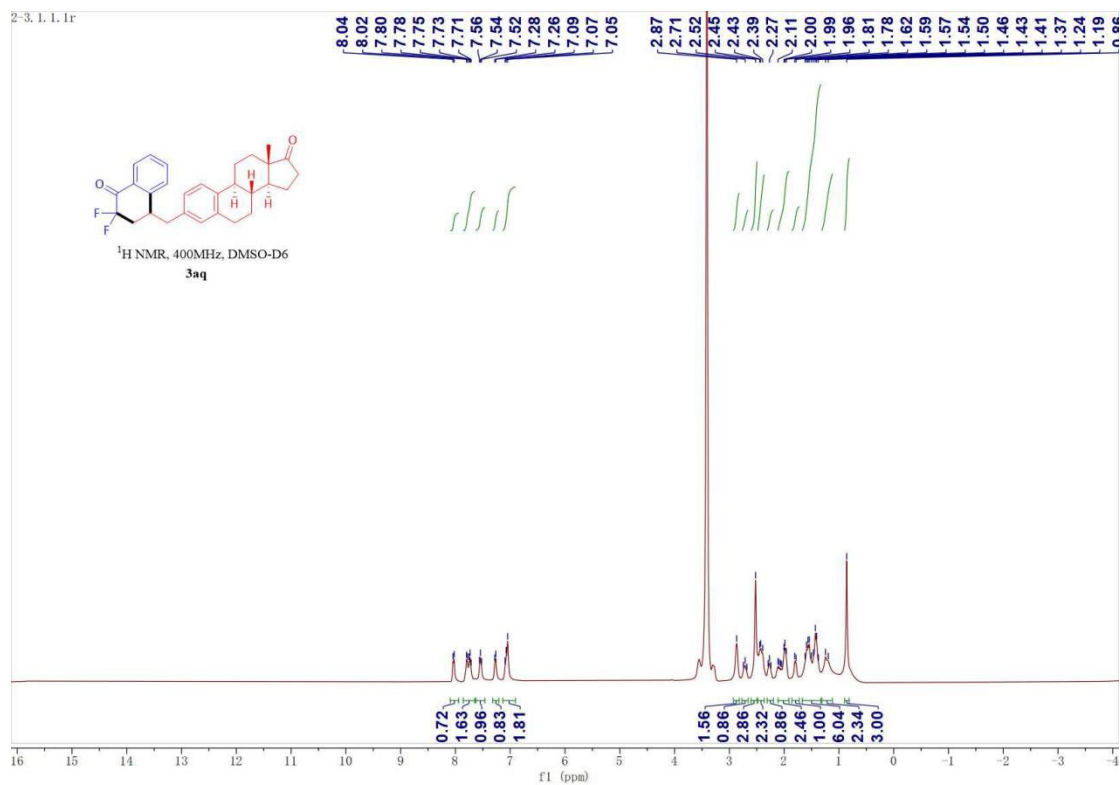

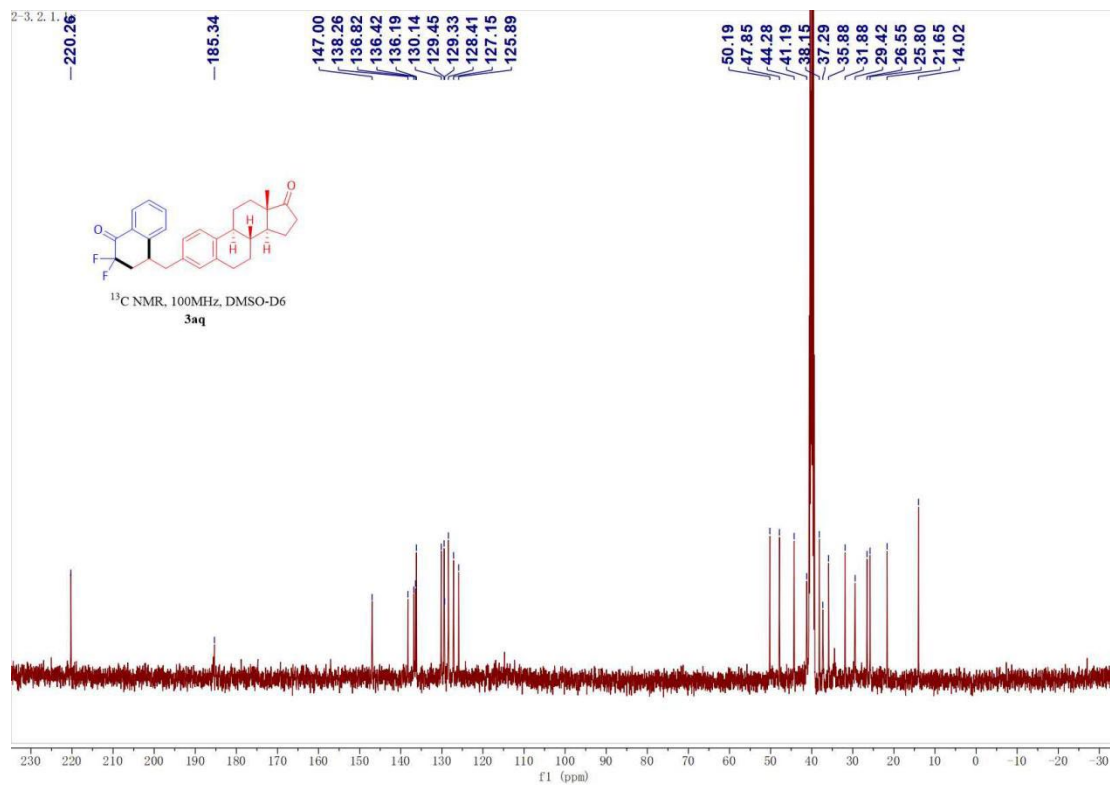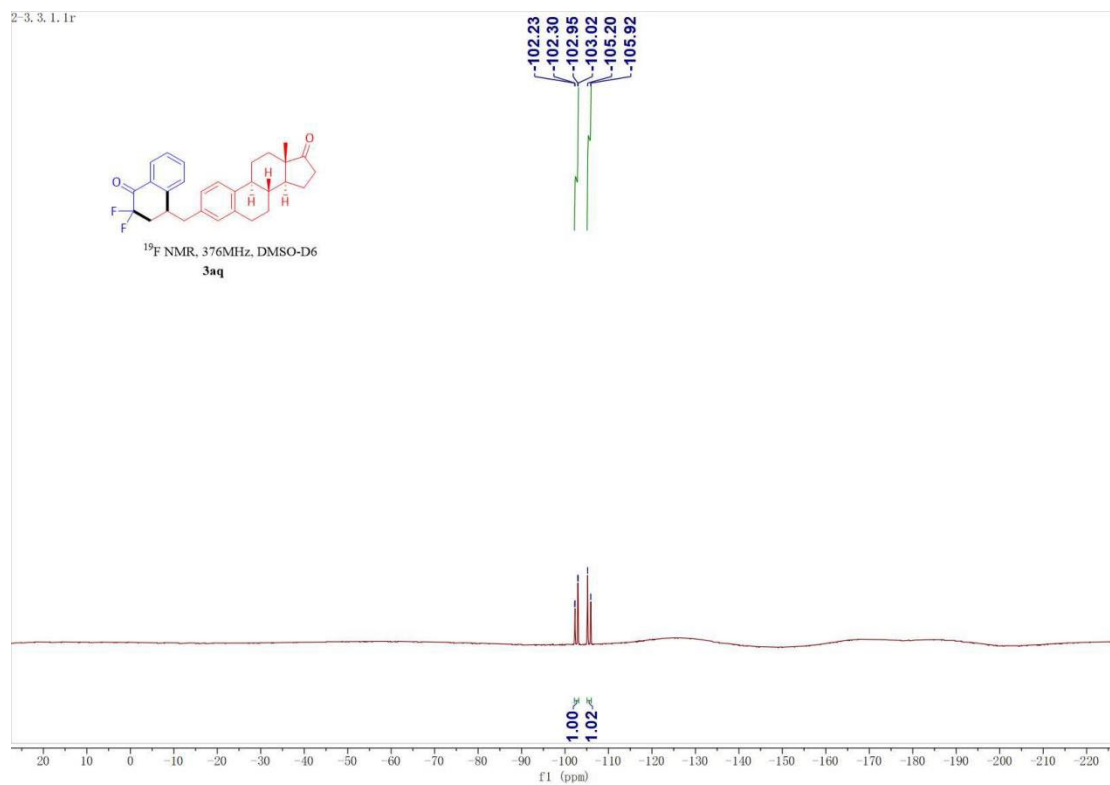



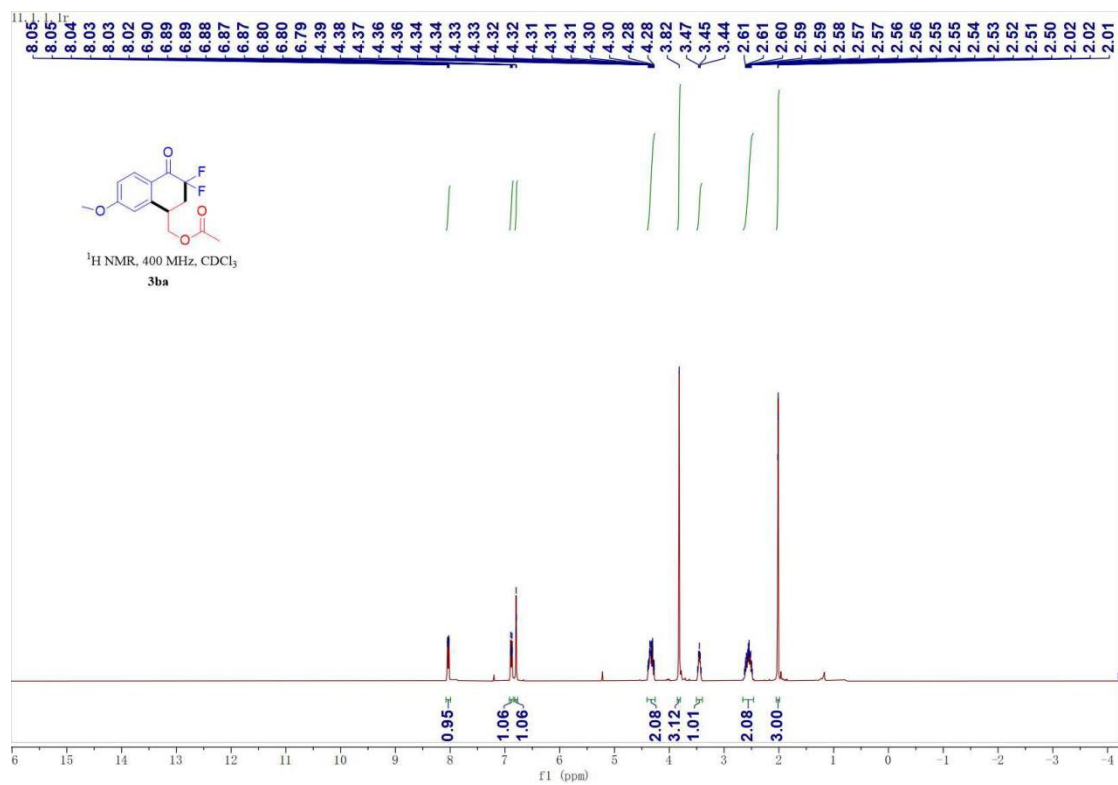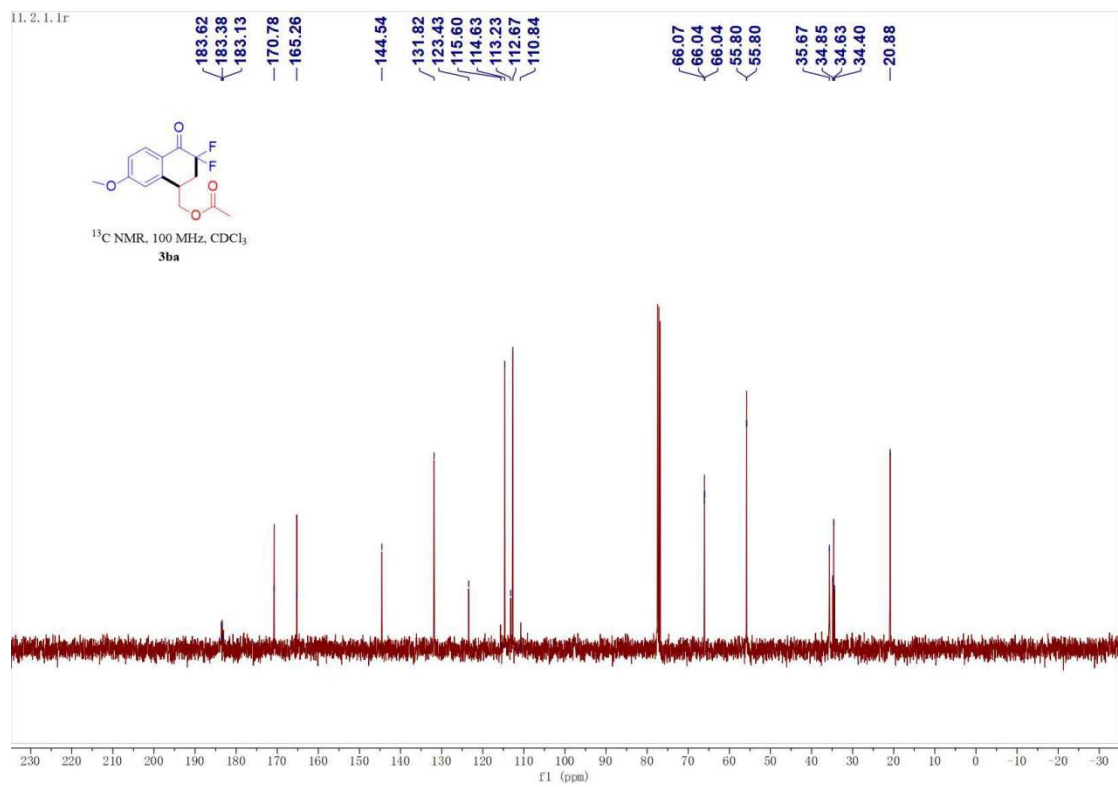

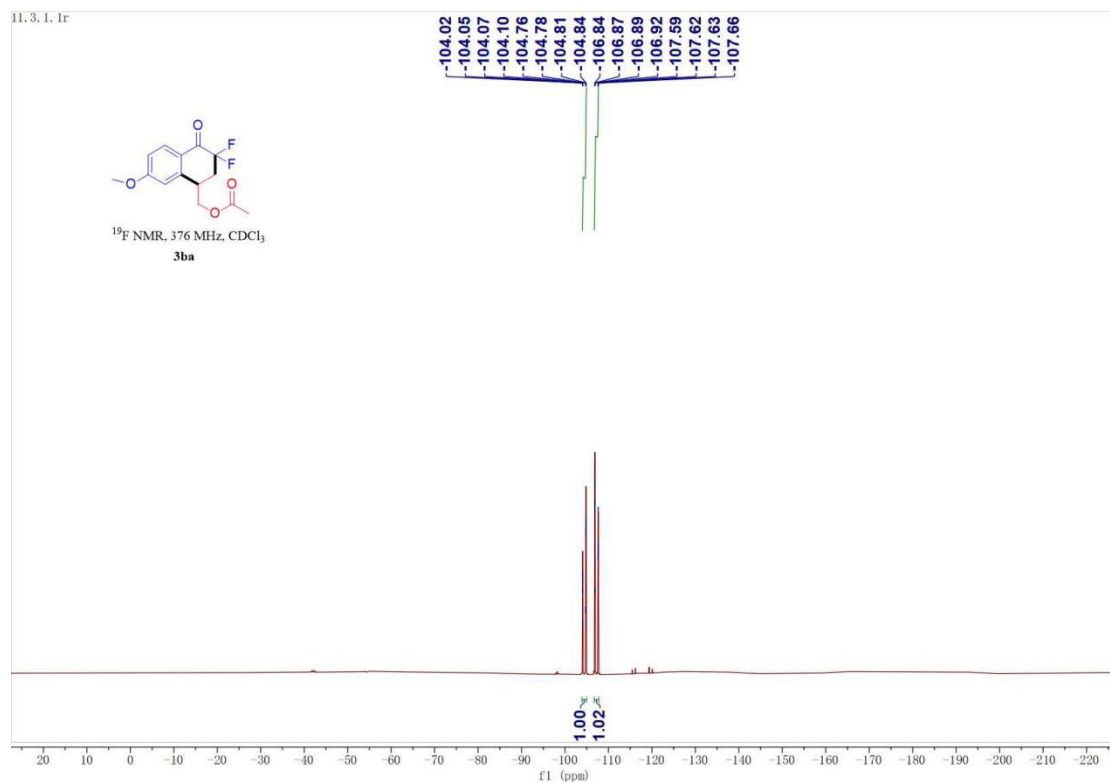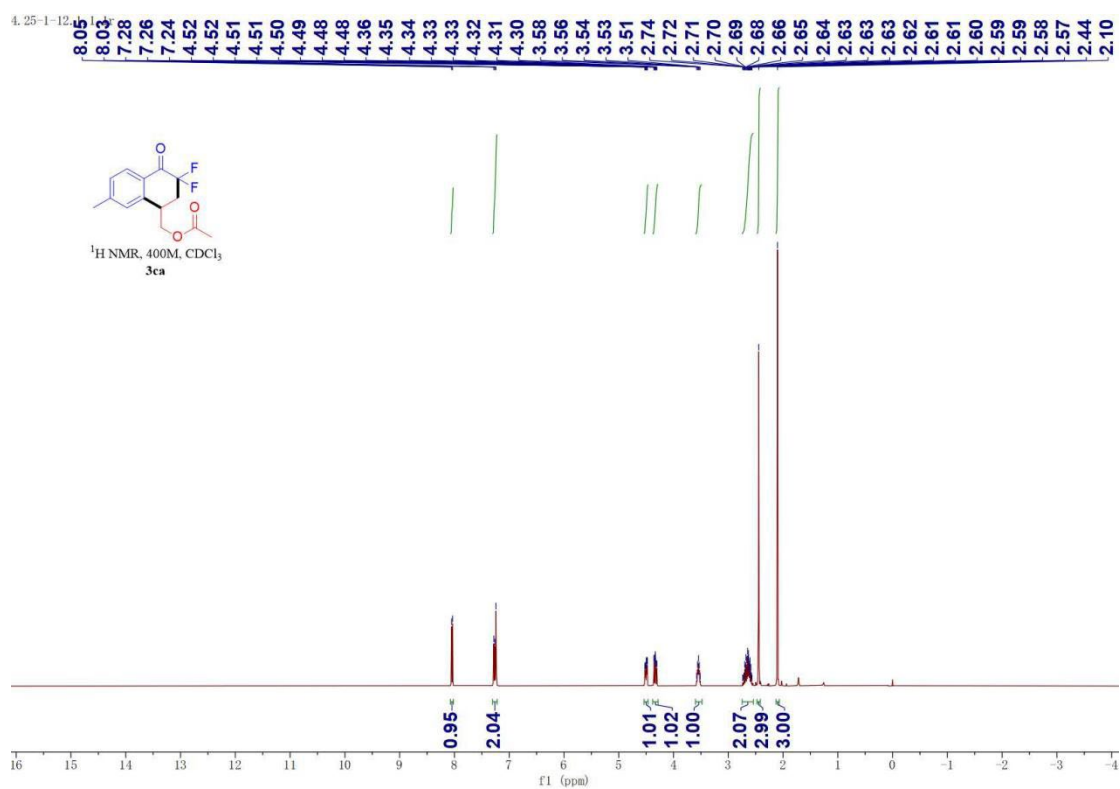

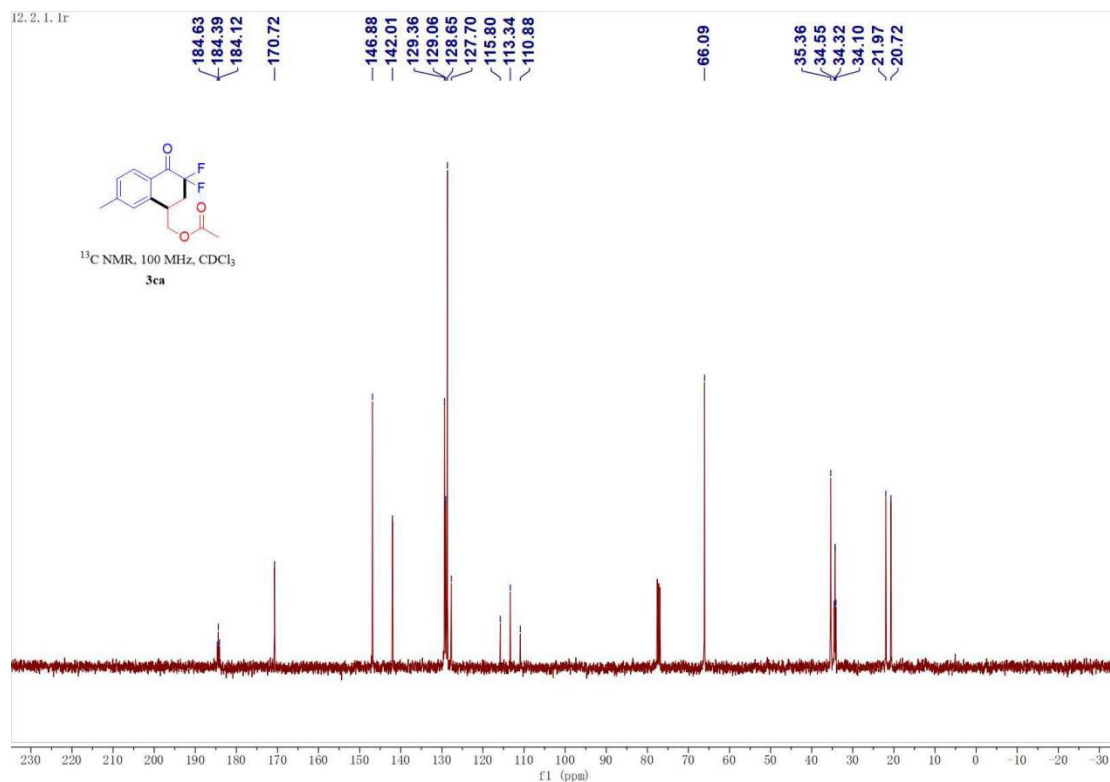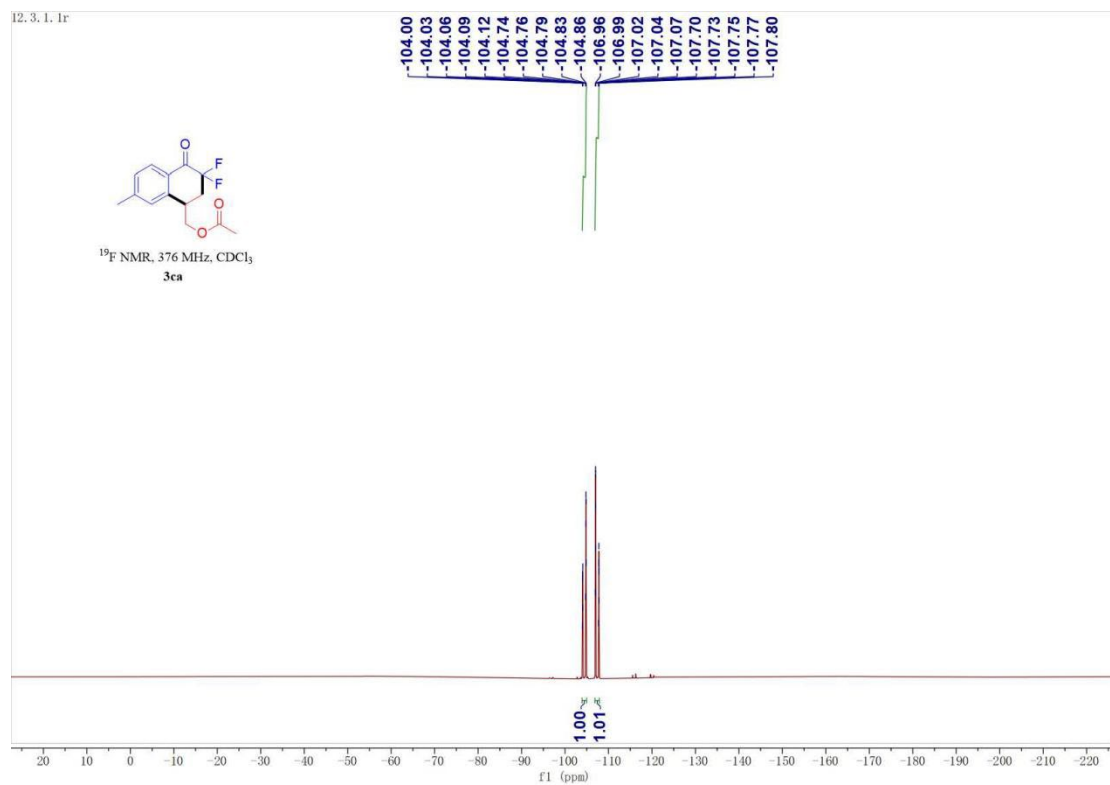

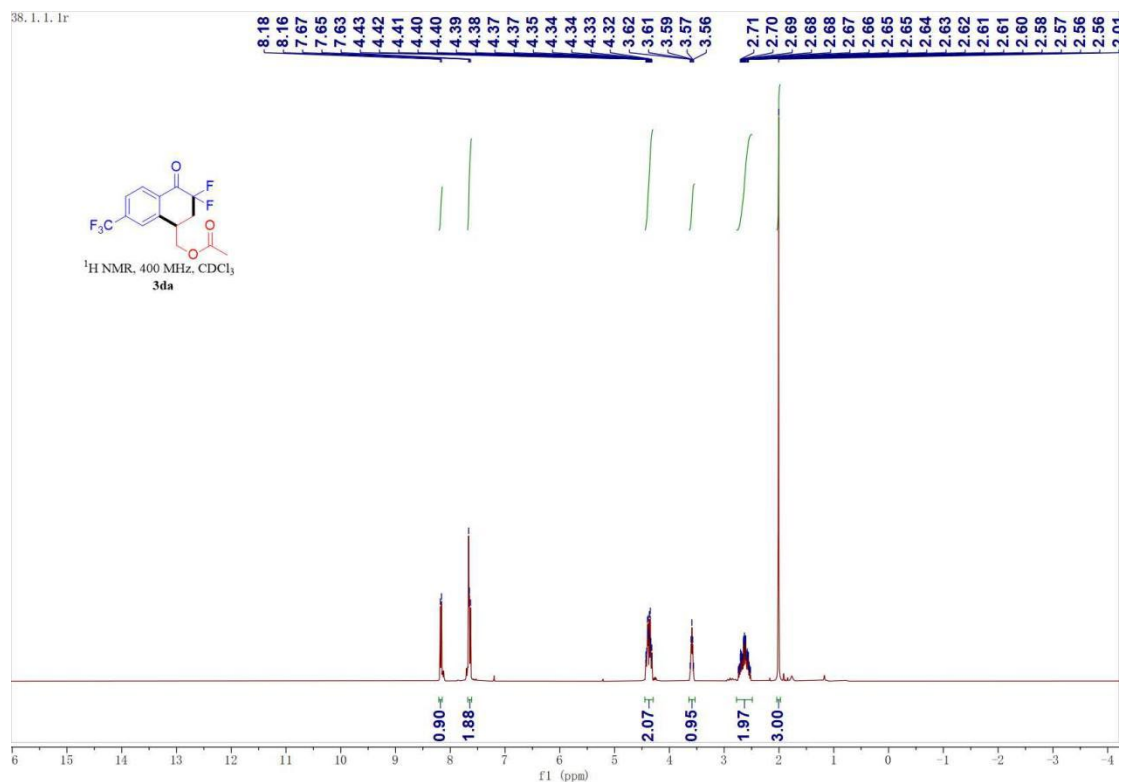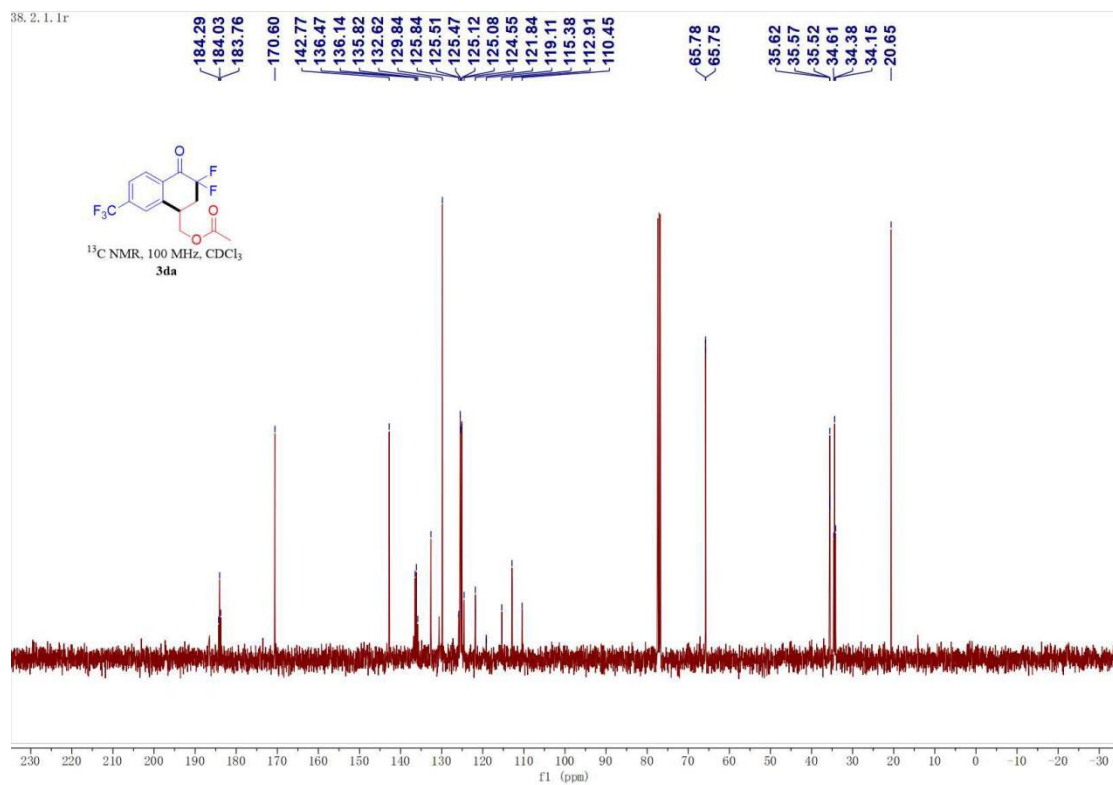

8. 1. 1. 1r

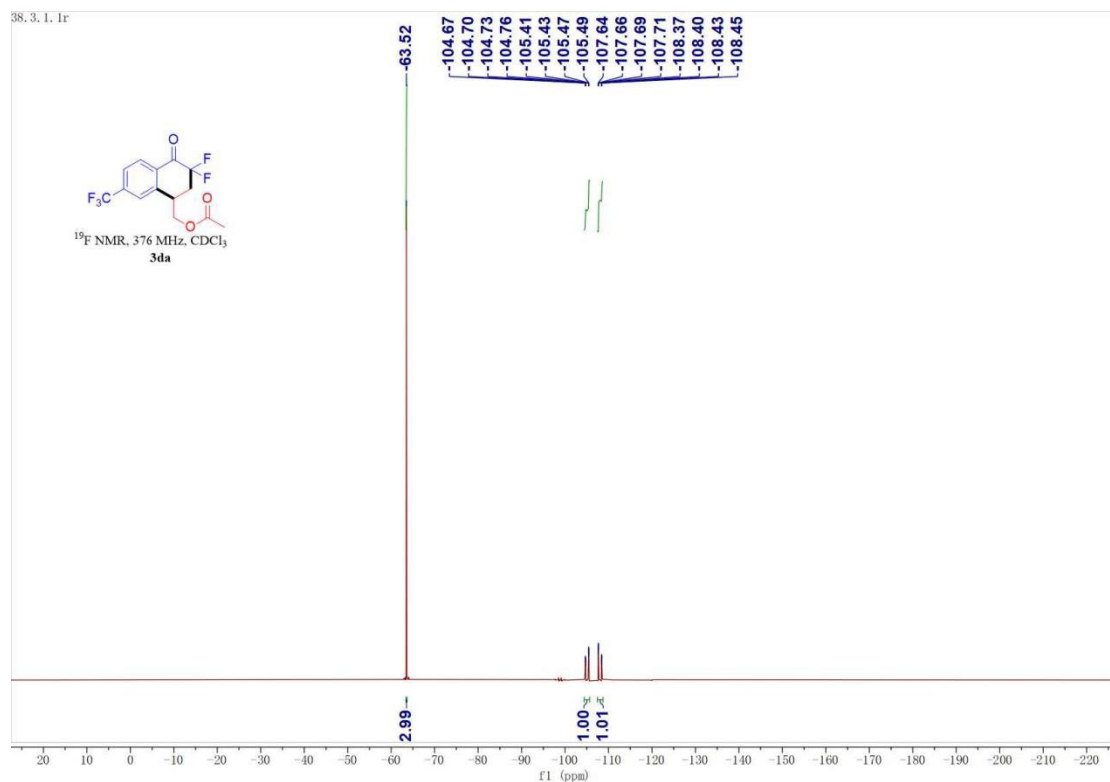

6. 1. 1. 1r

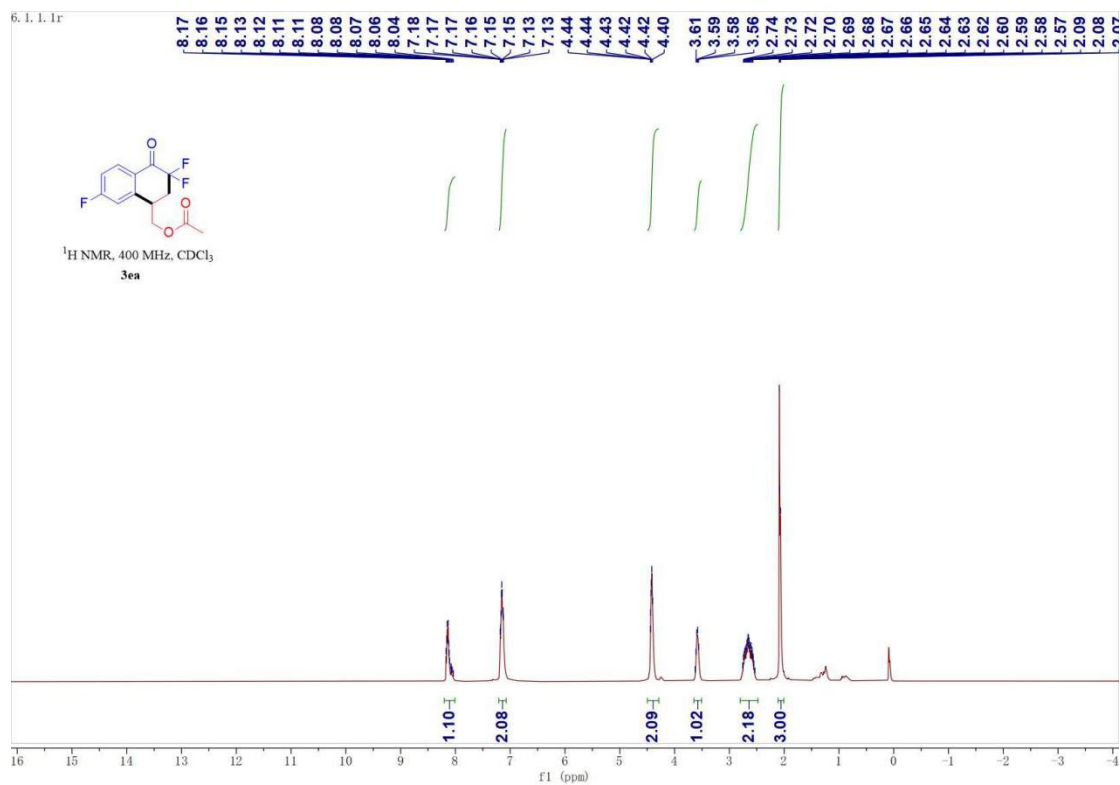

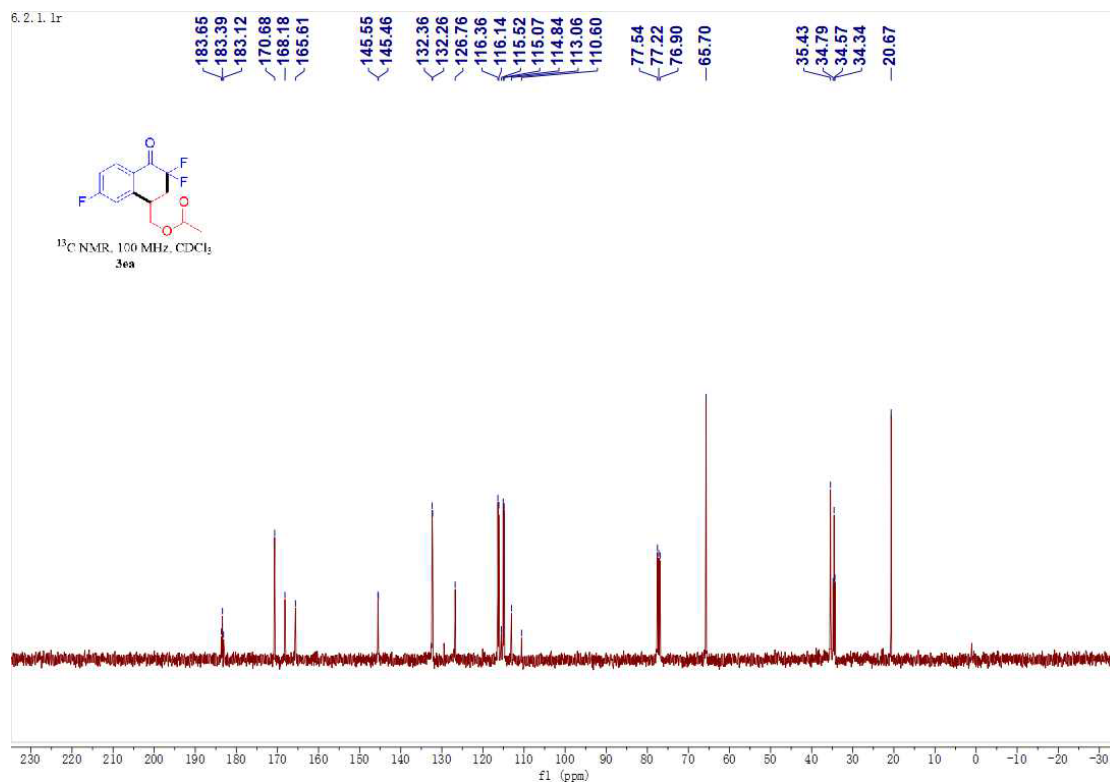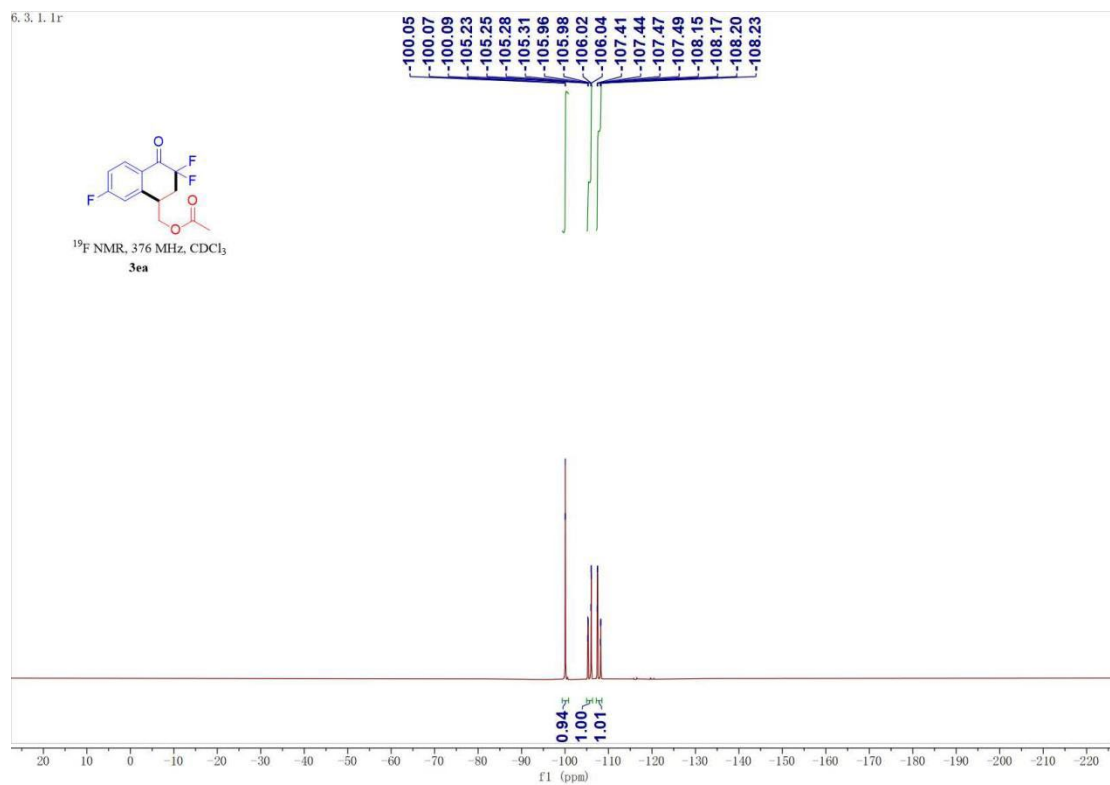

7.1.1.1r

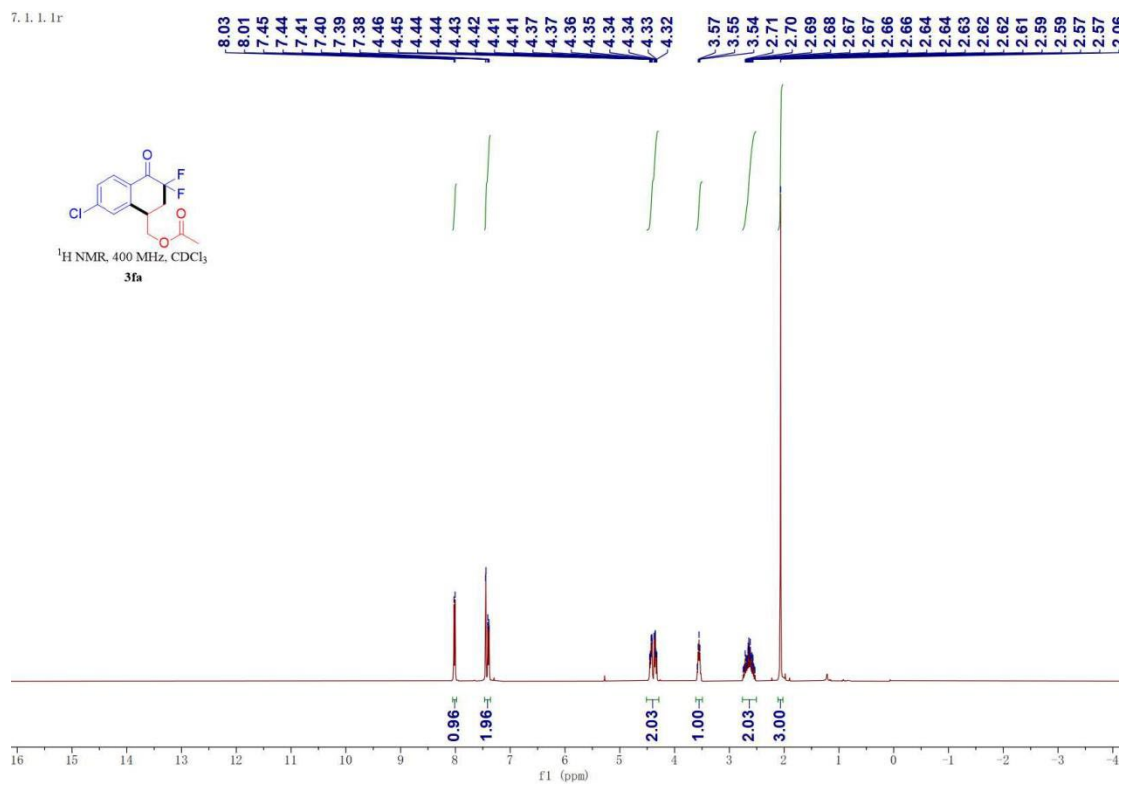

7.2.1.1r

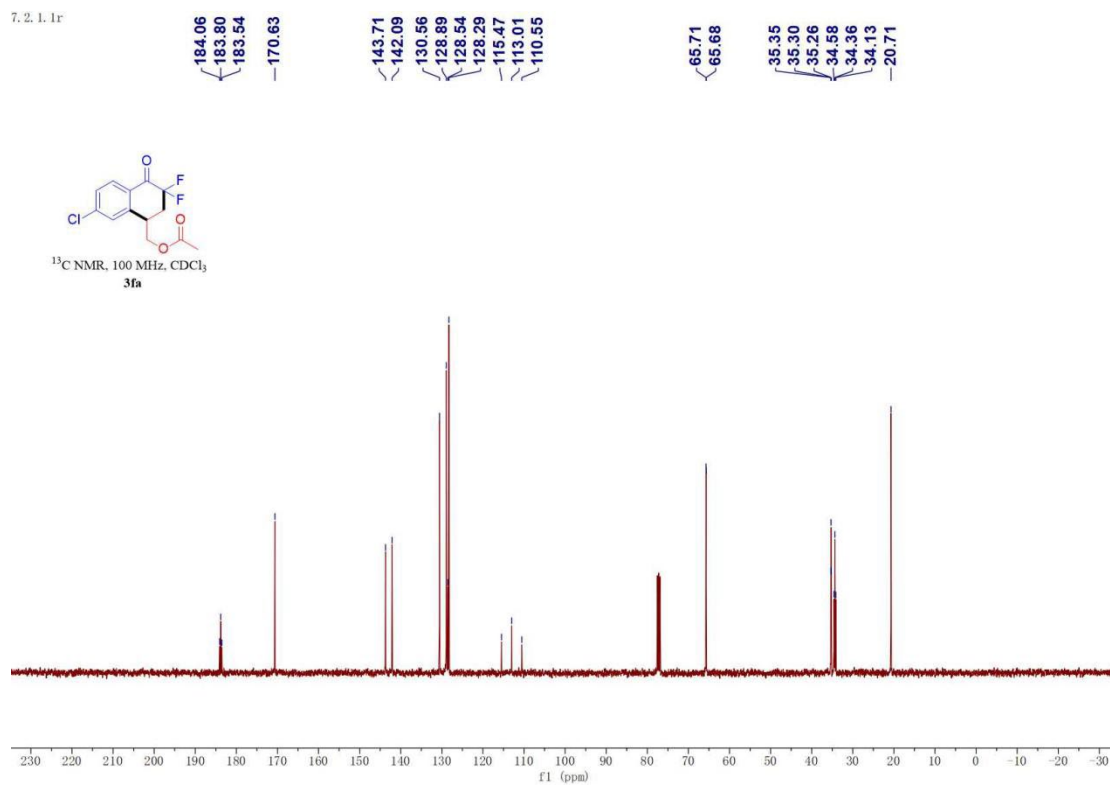

7.3.1.1r

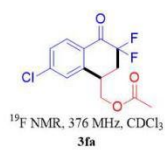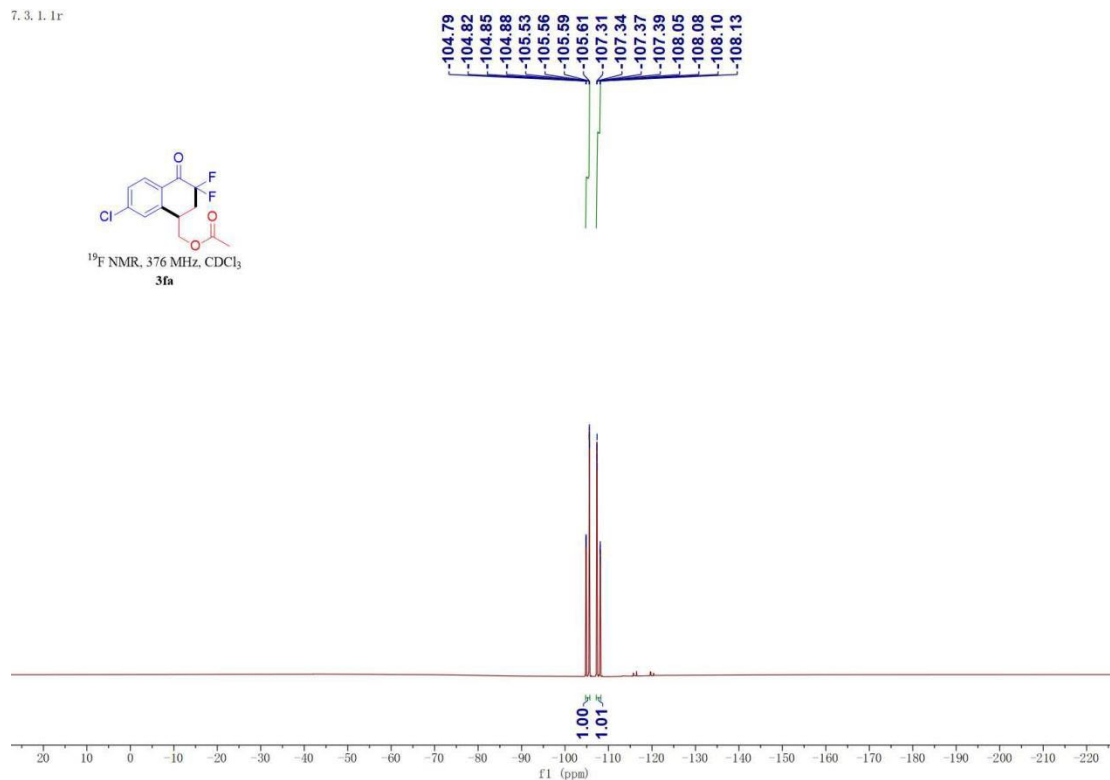

14.1.1.1r

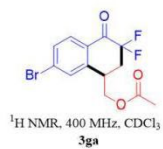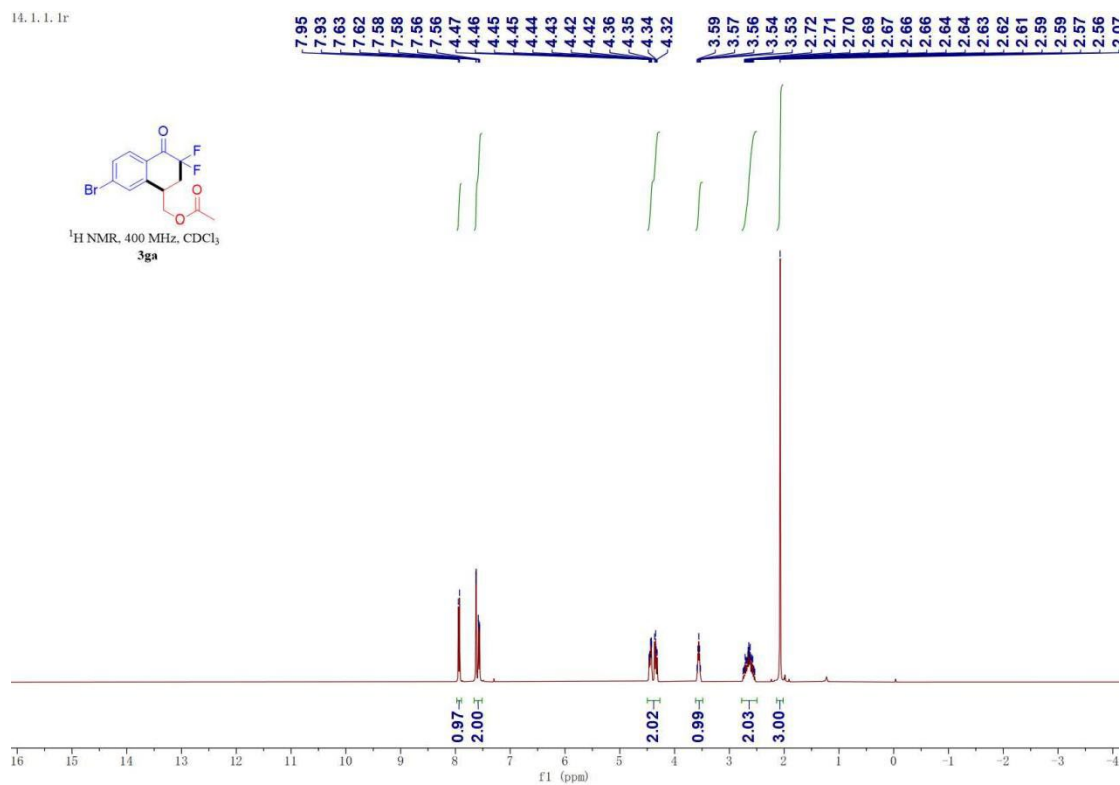



14.2.1. 1r

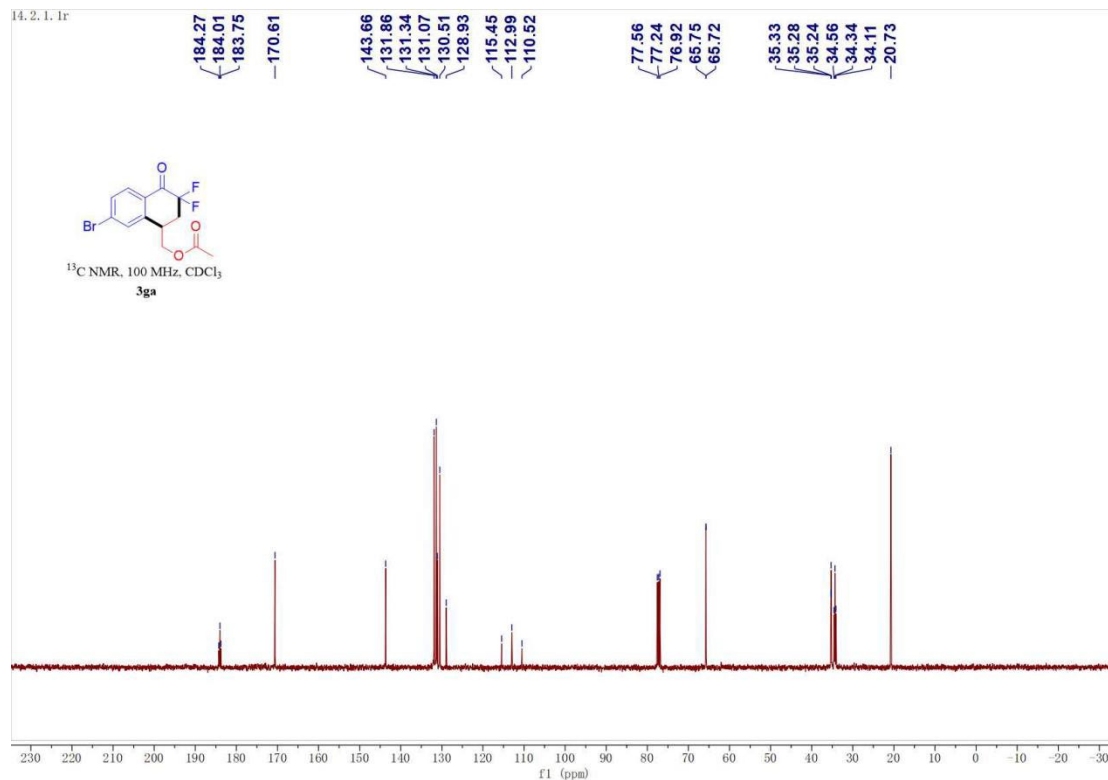

14.3.1. 1r

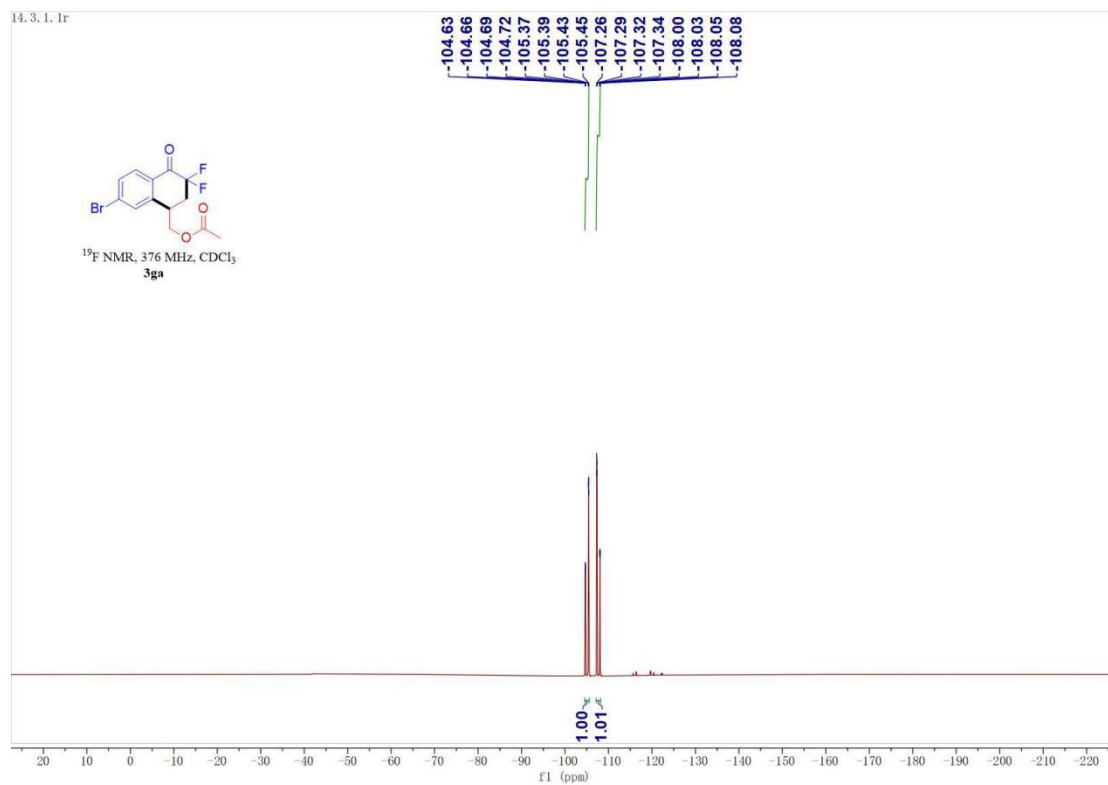

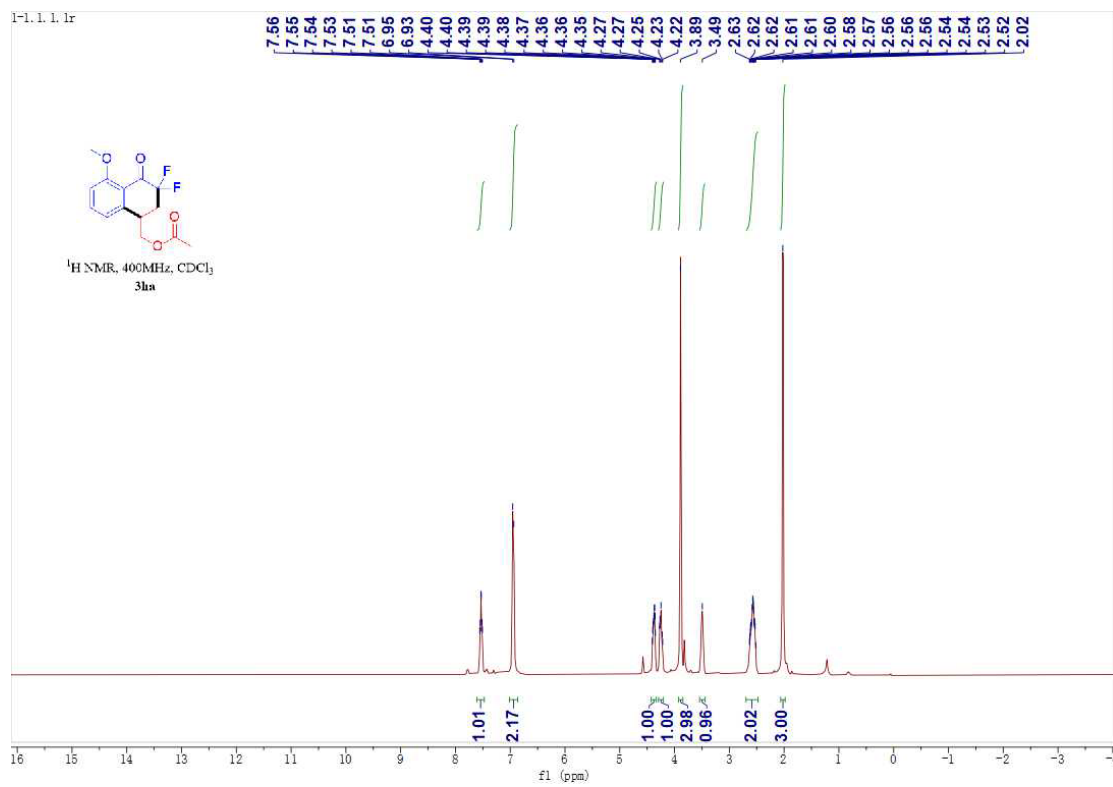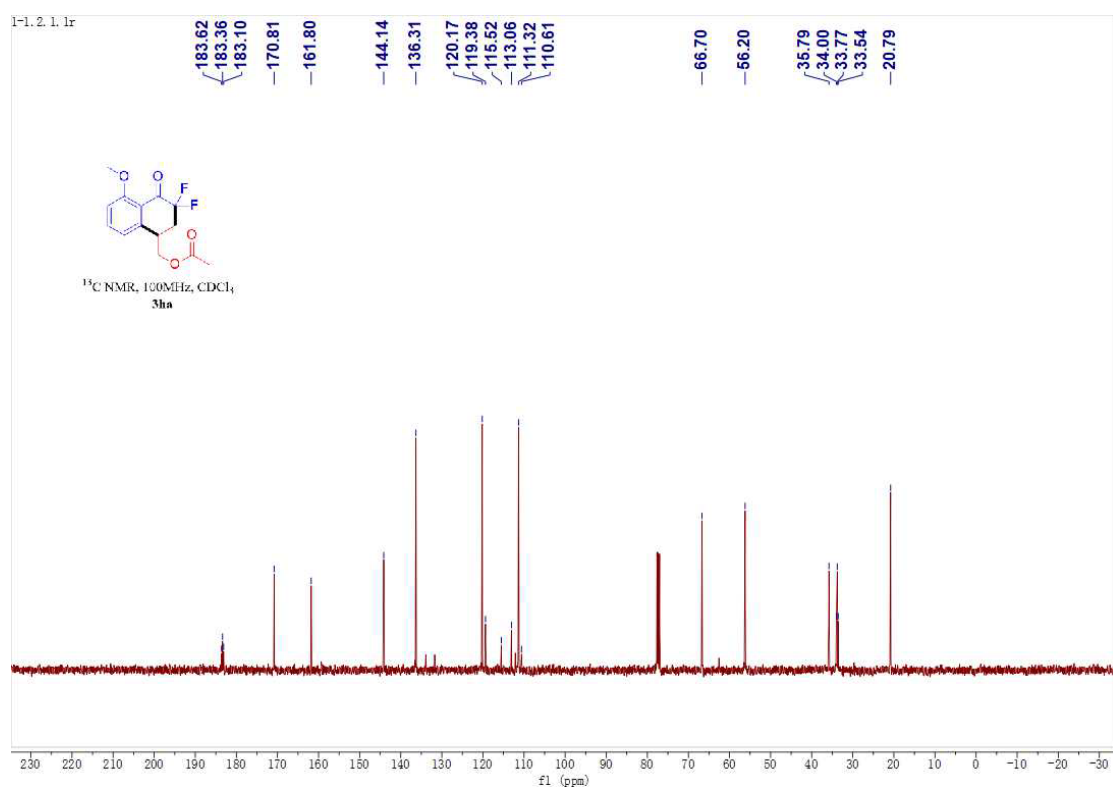

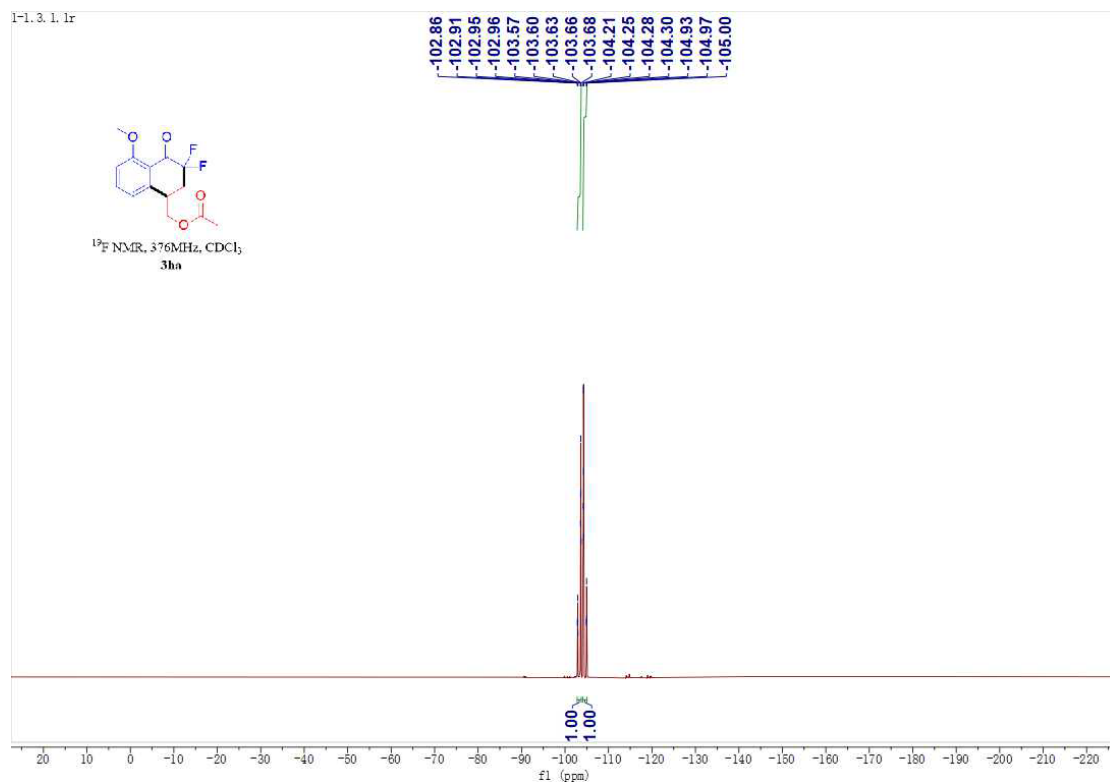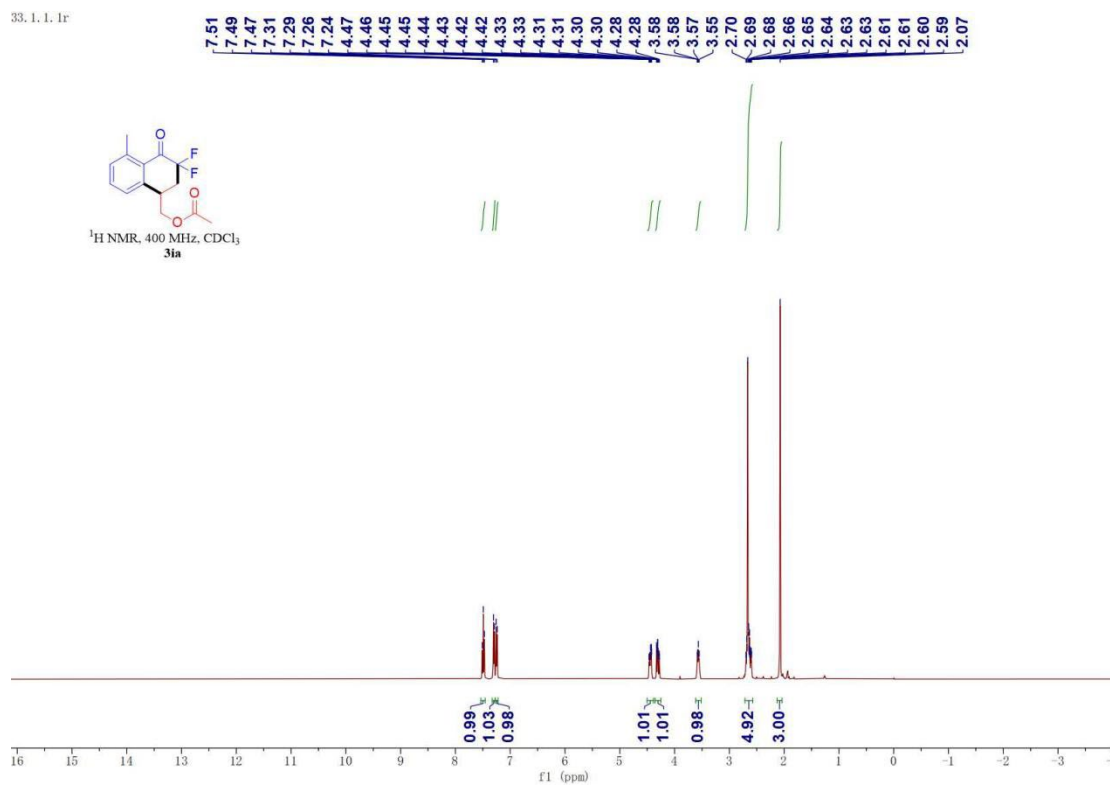

33.2.1.1r

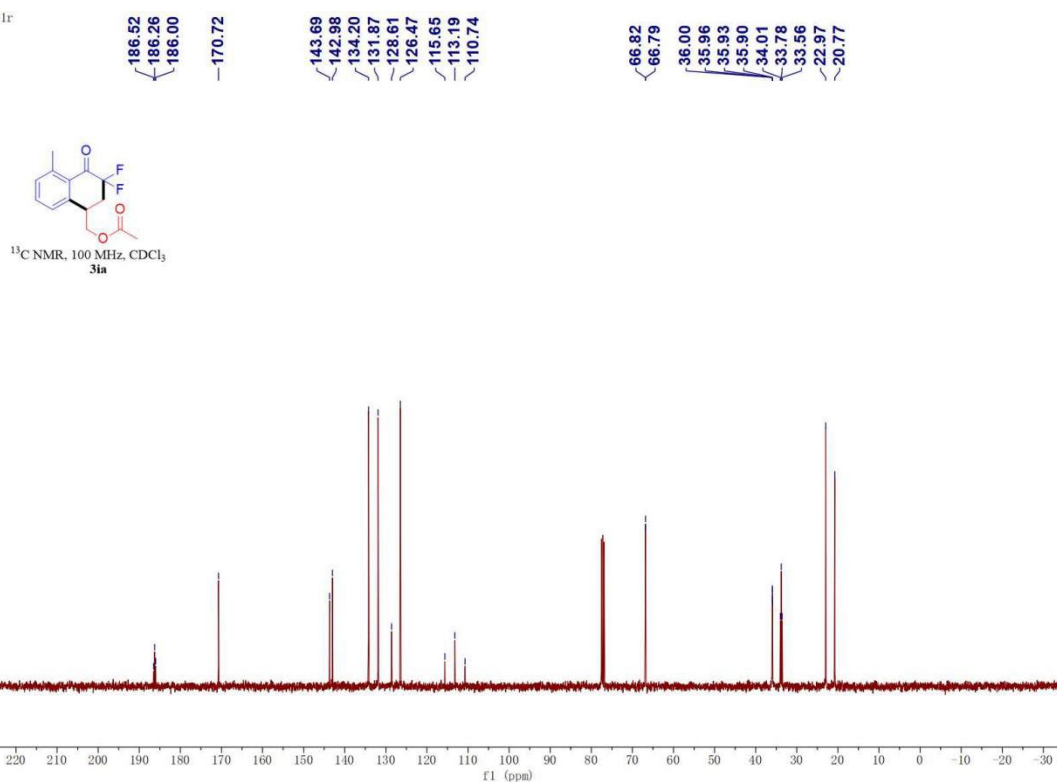

33.3.1.1r

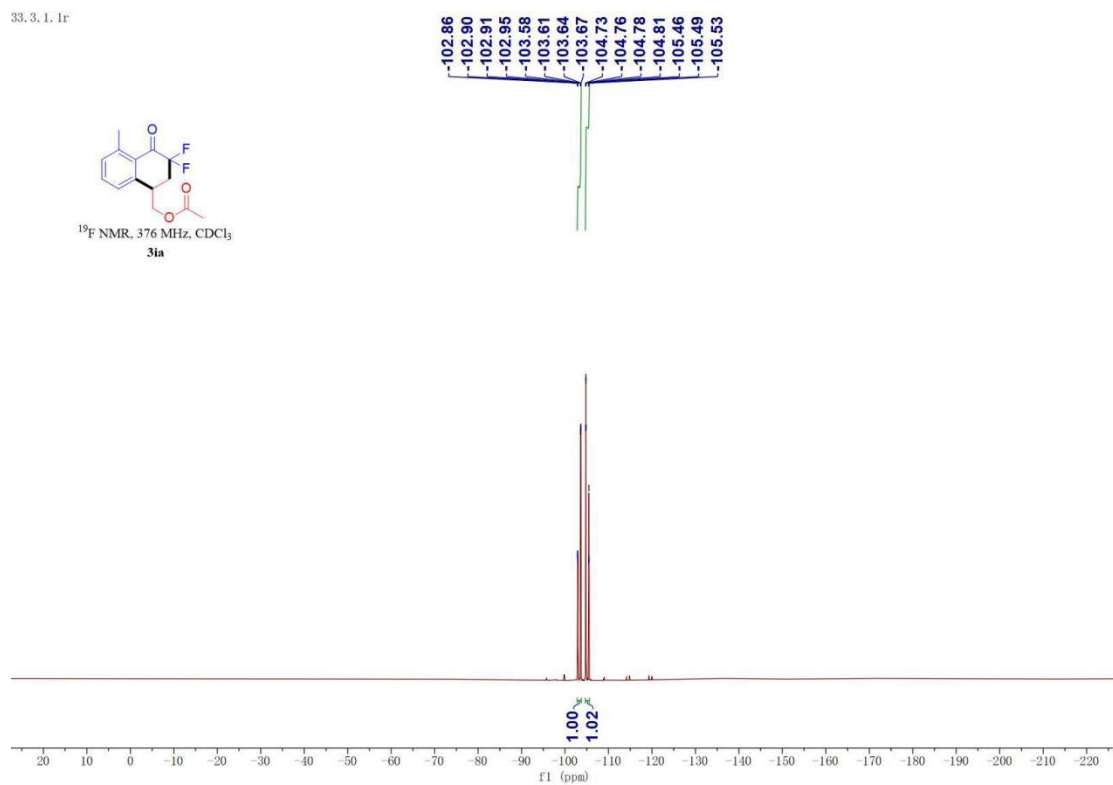

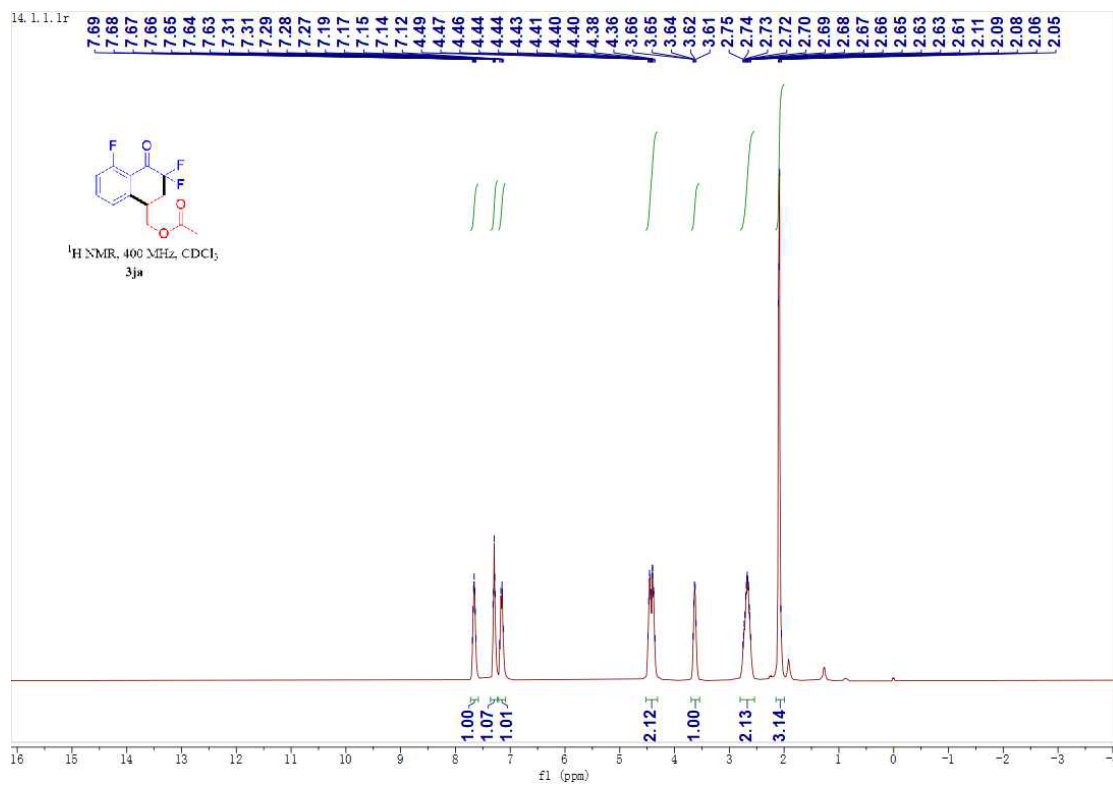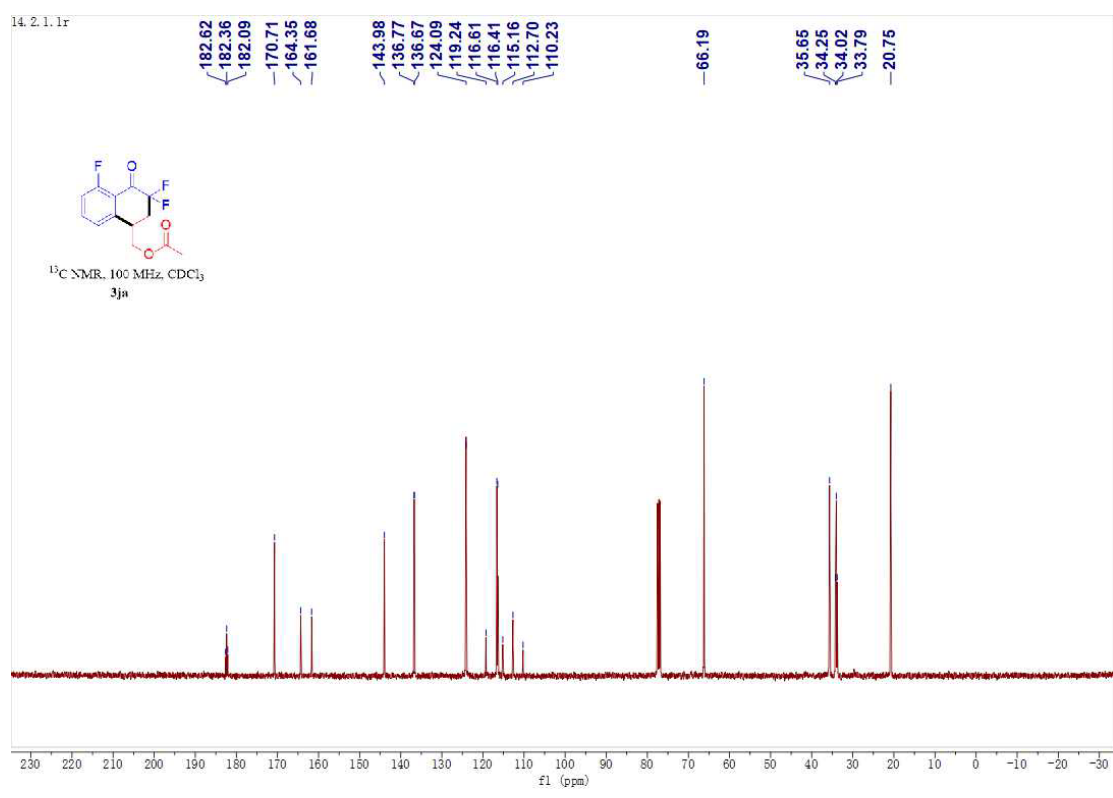

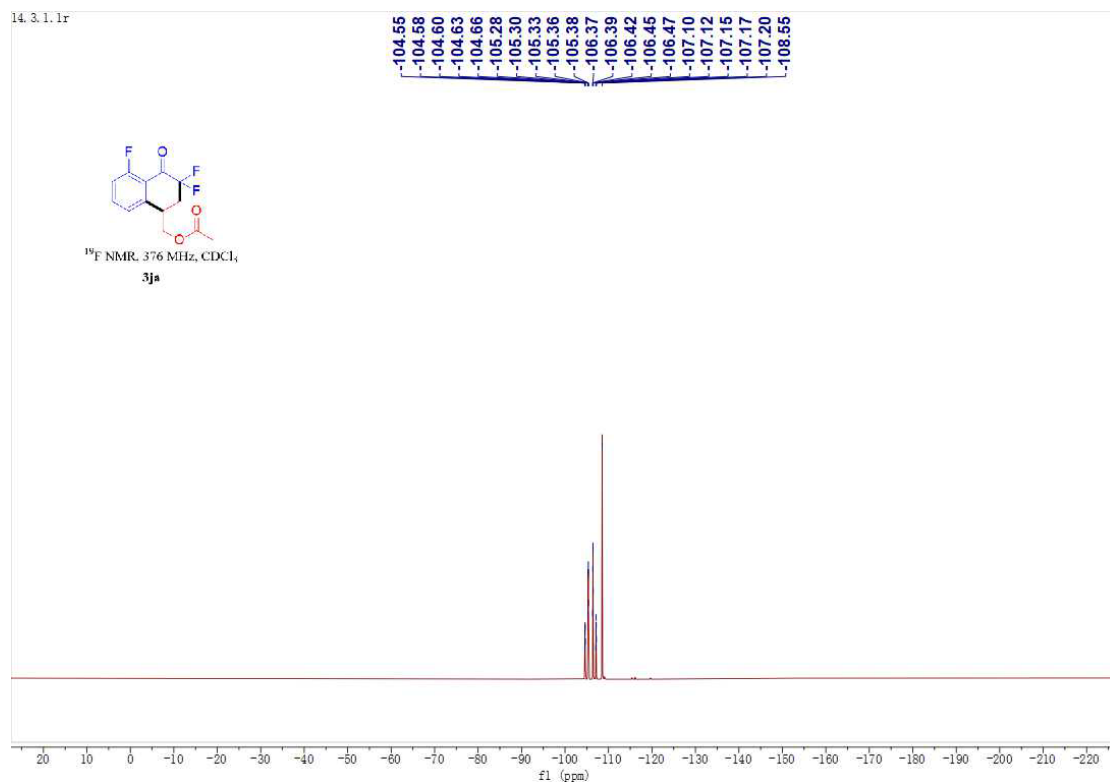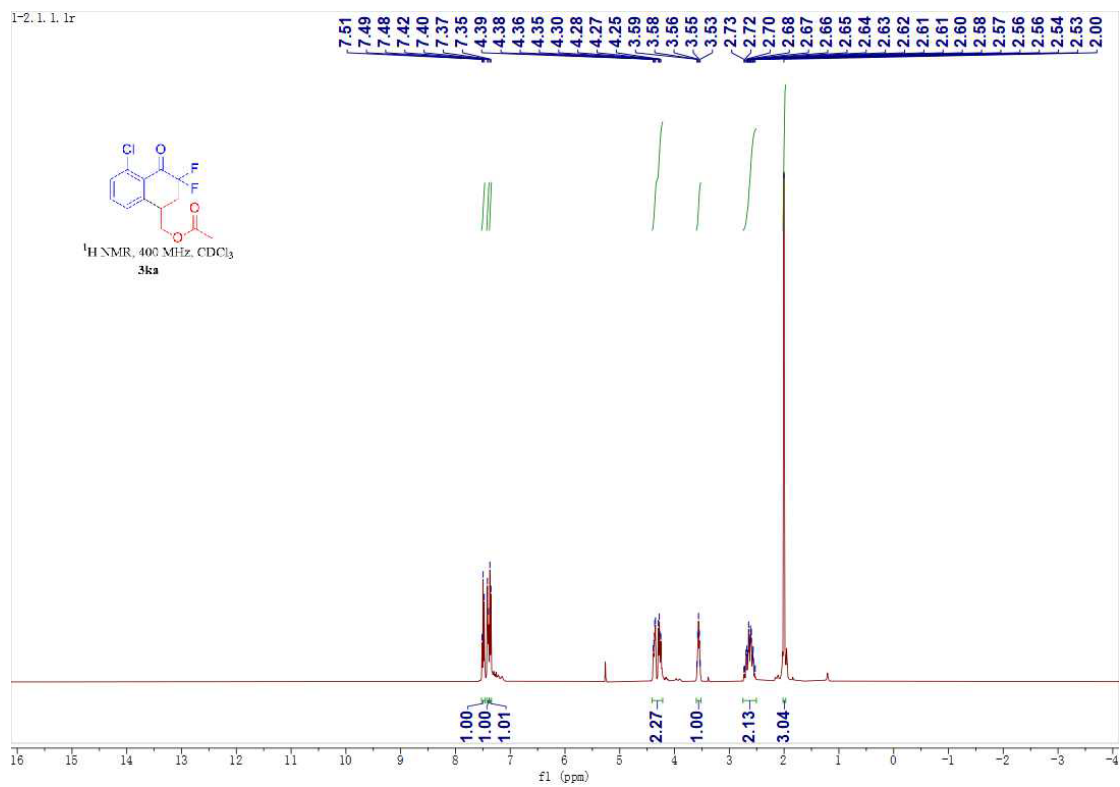

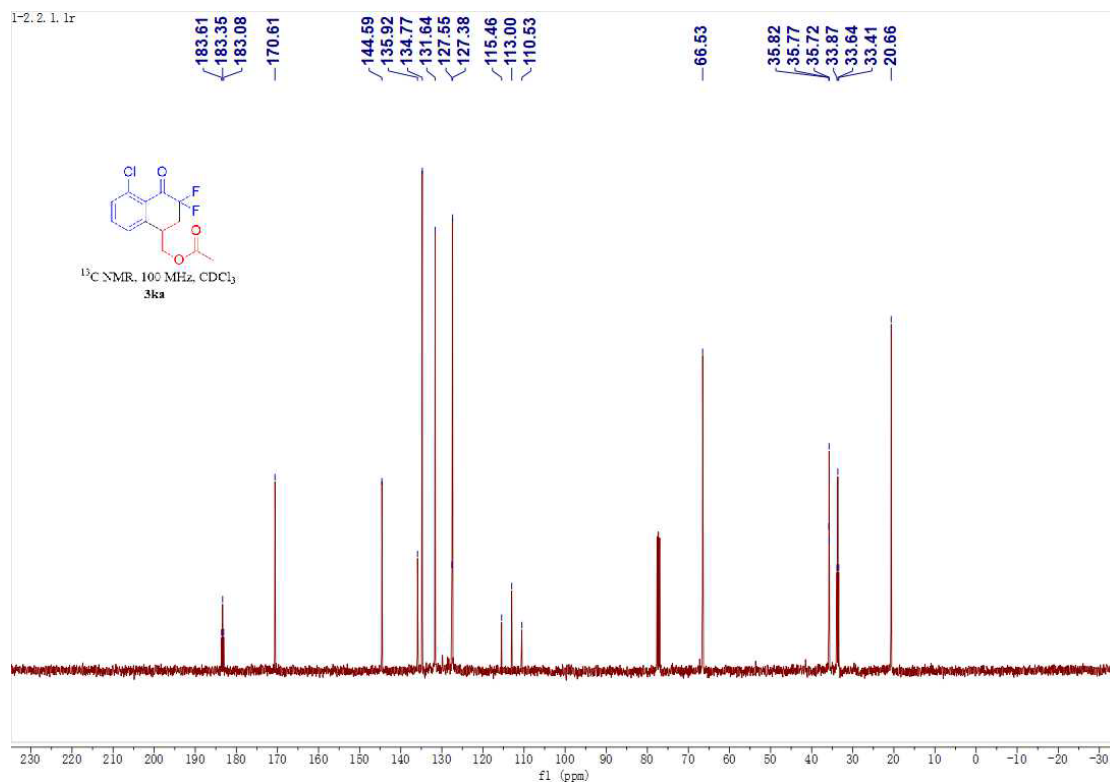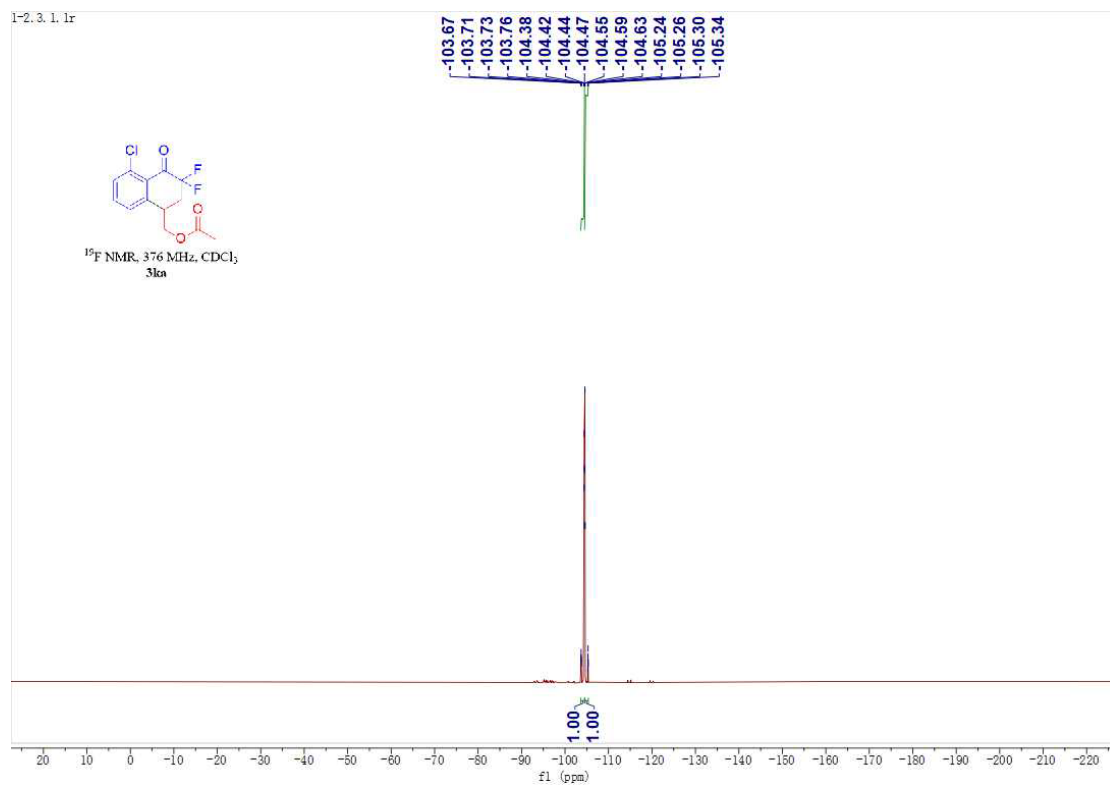

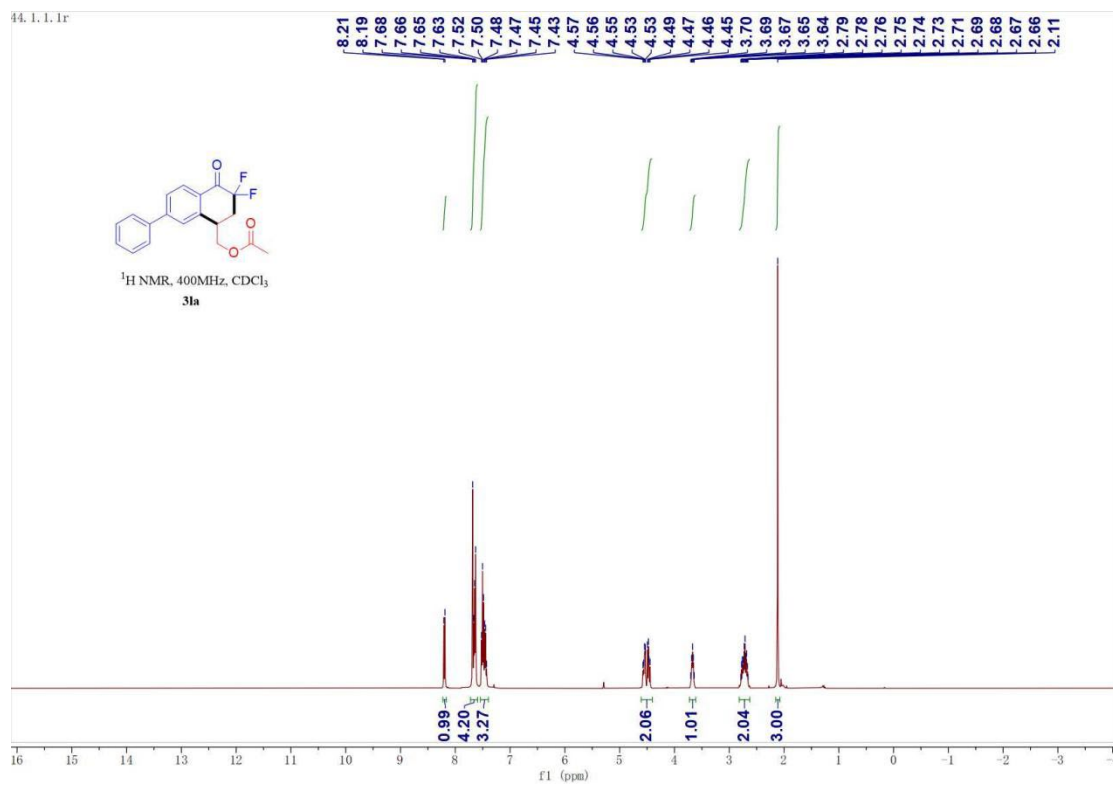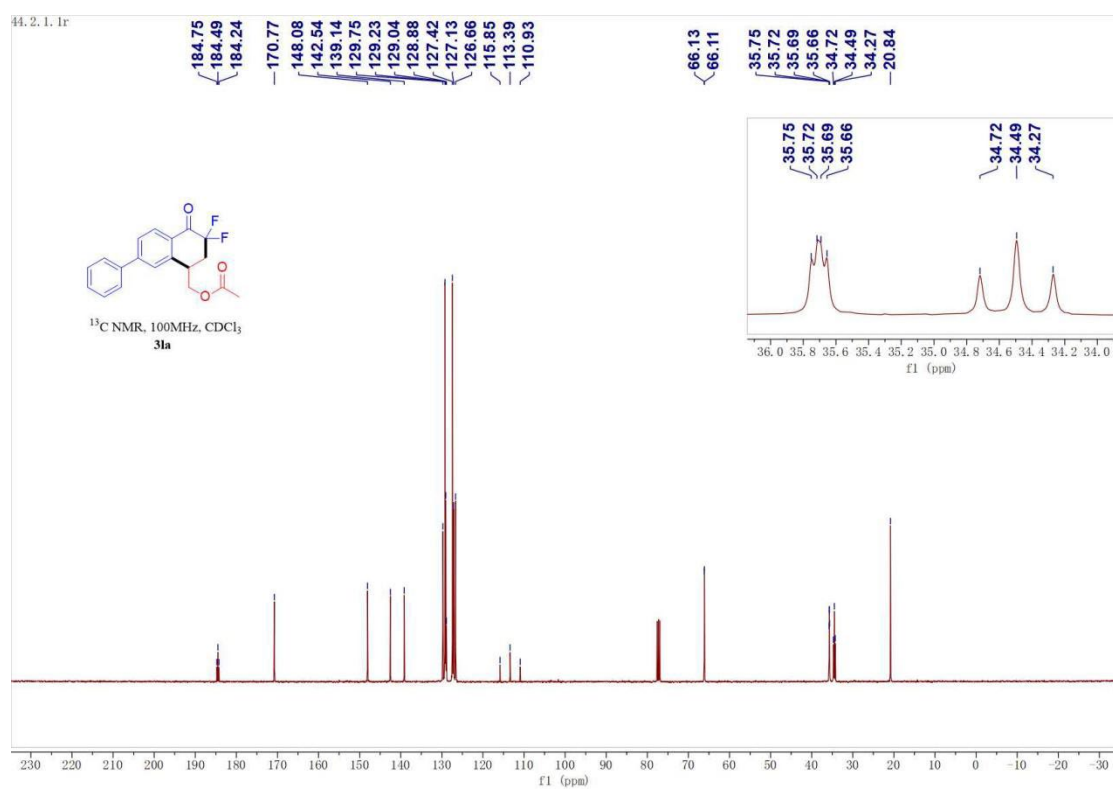



44.3.1.1r

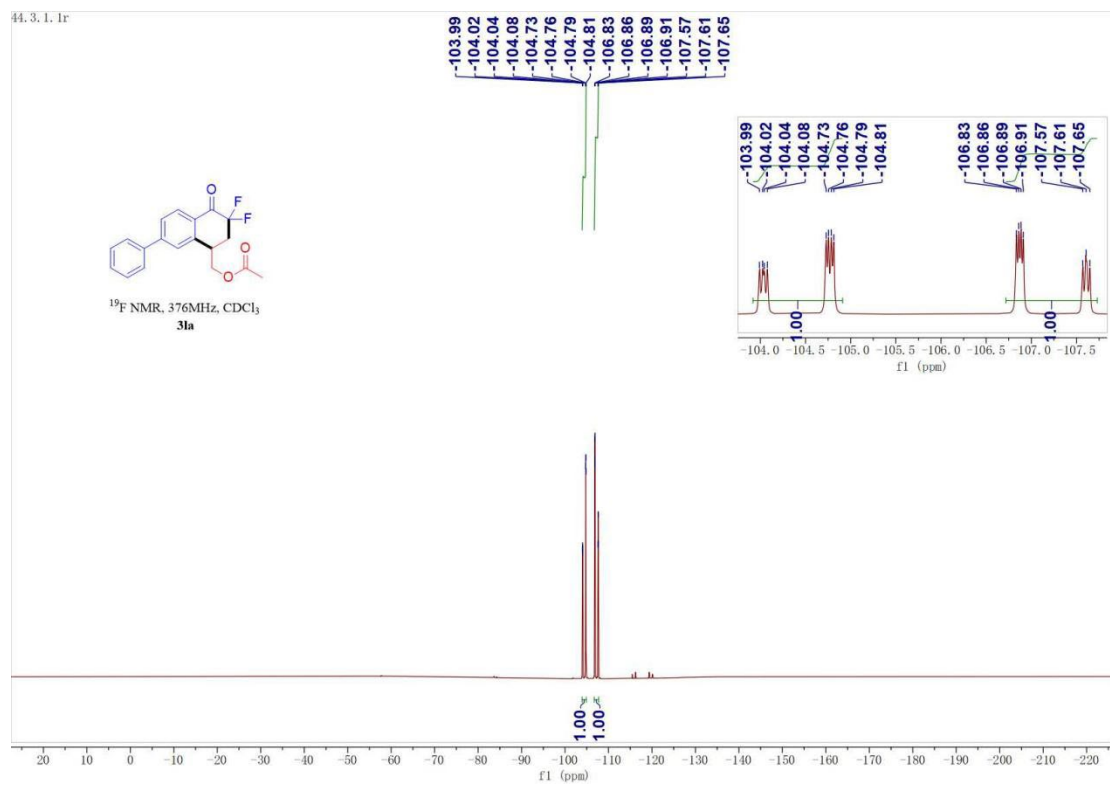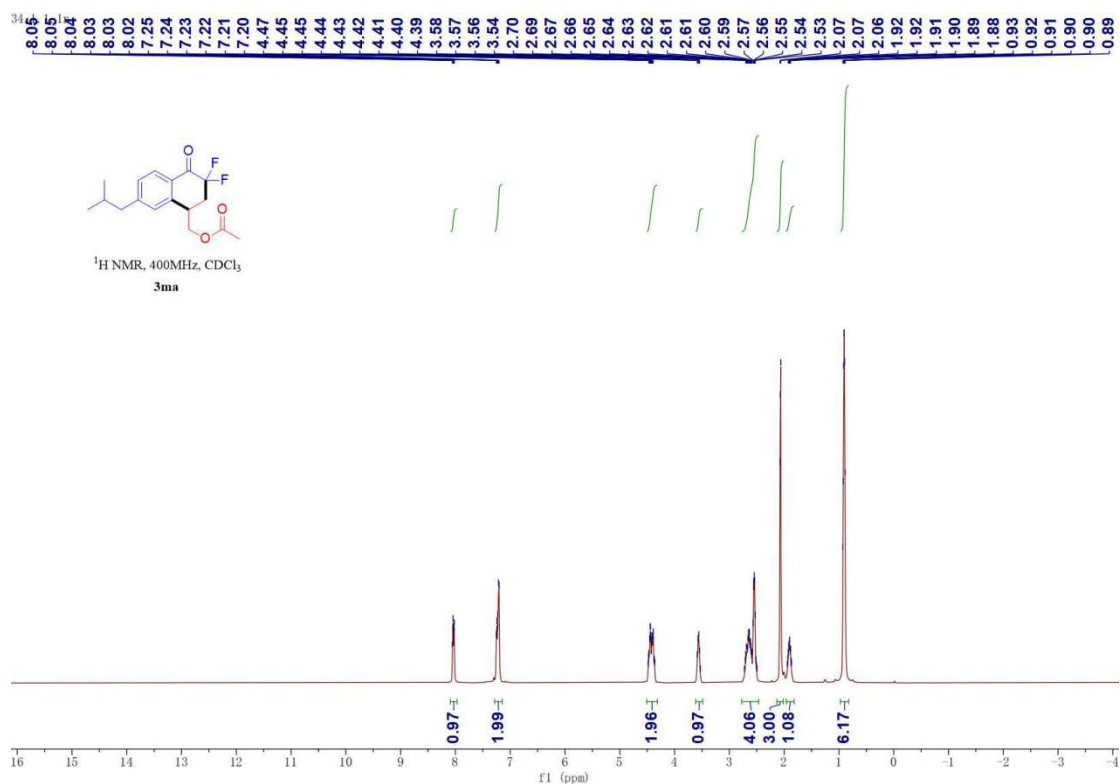

34.2.1.1r

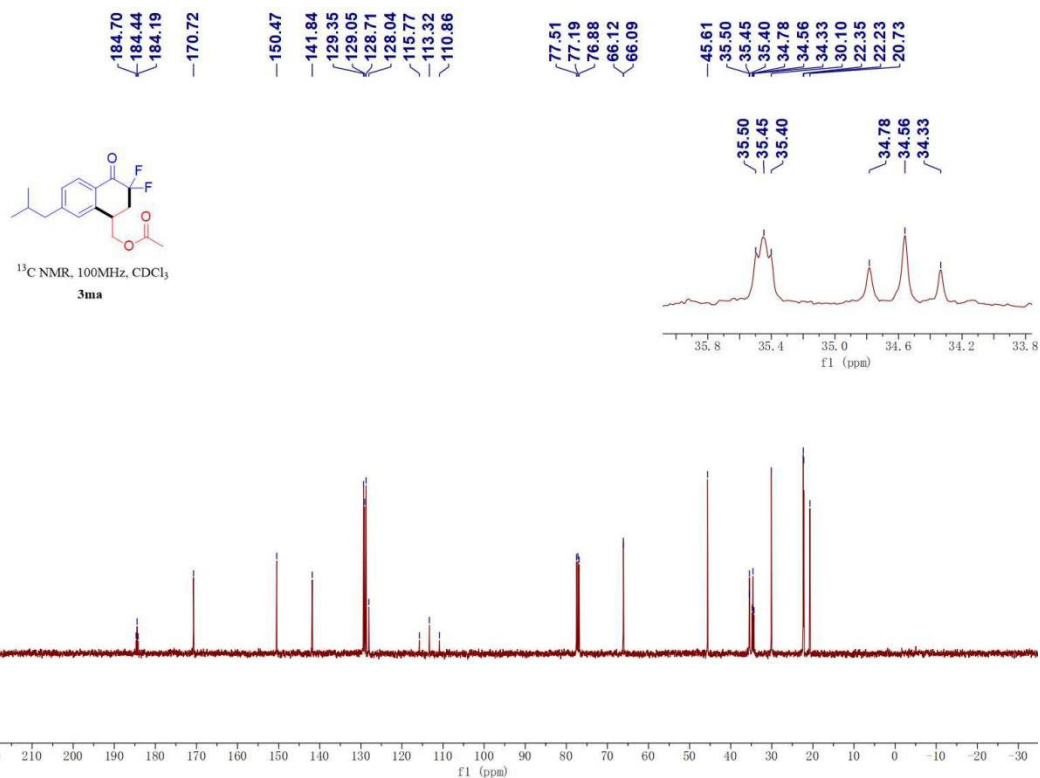

34.3.1.1r

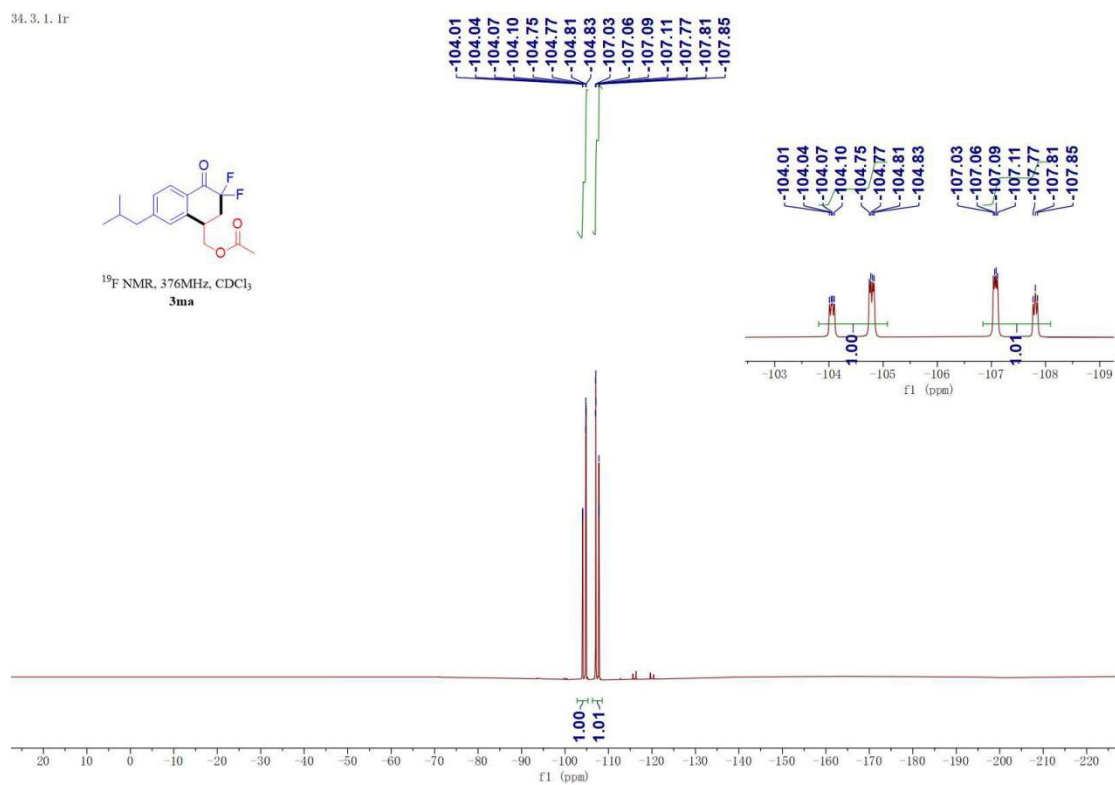

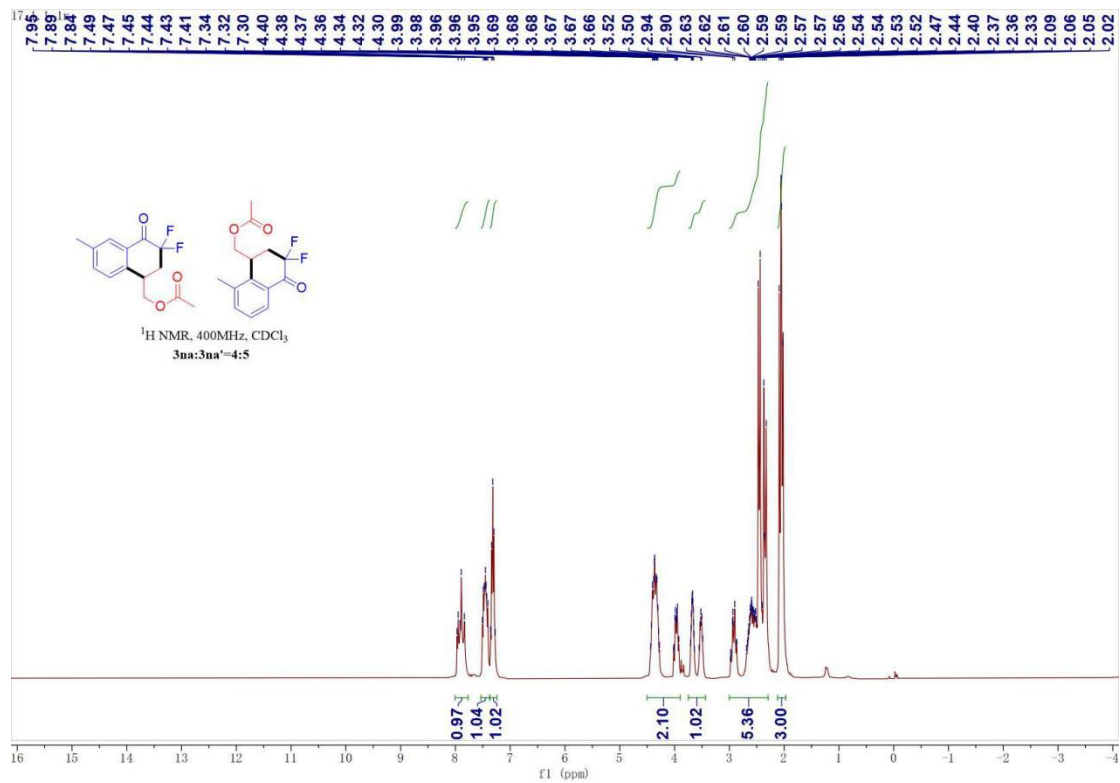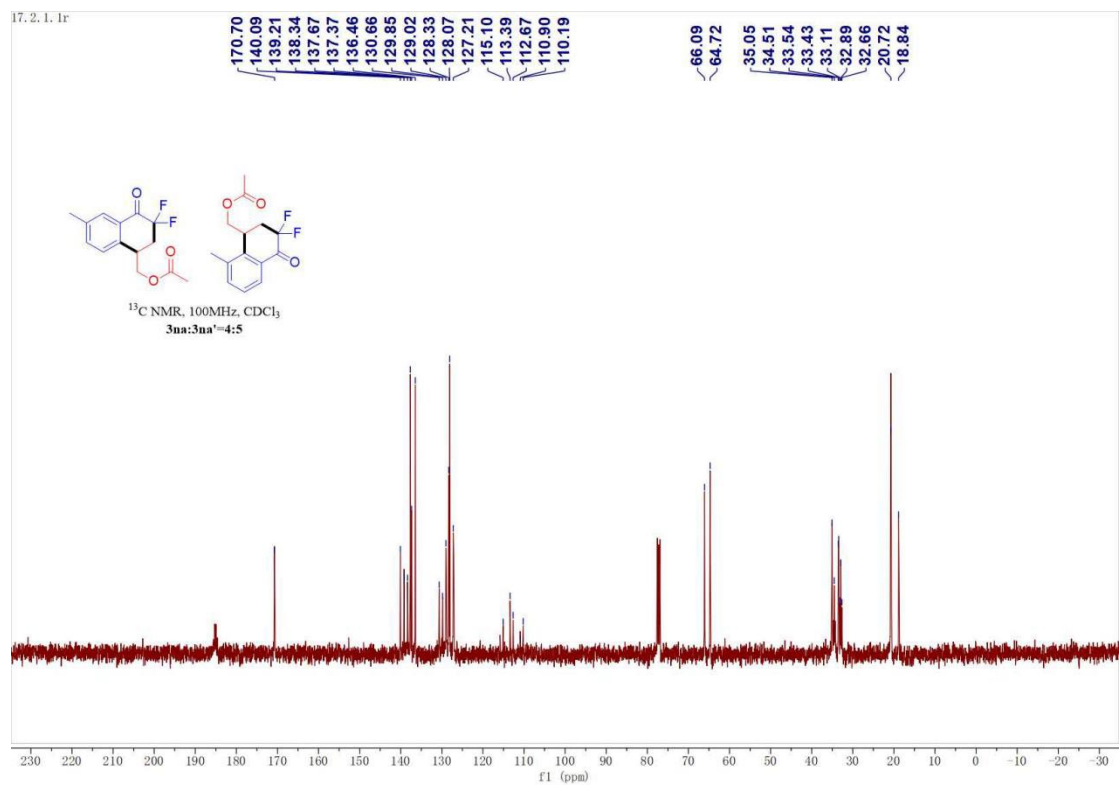

17.3.1.1r

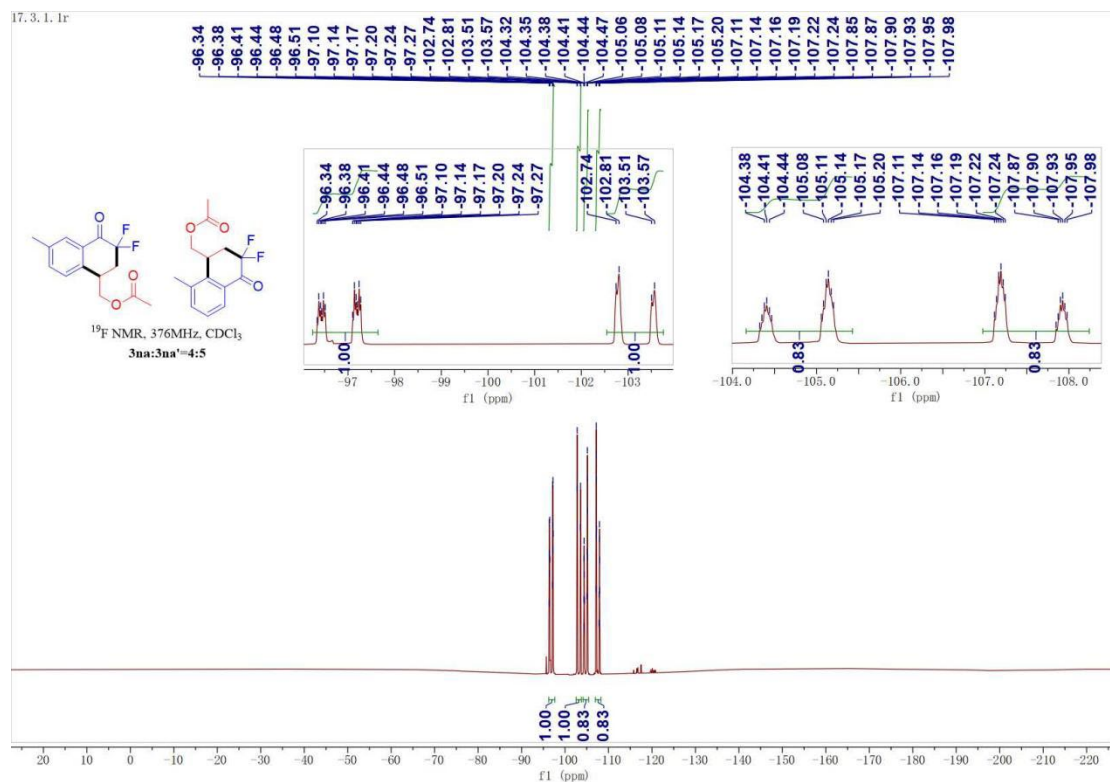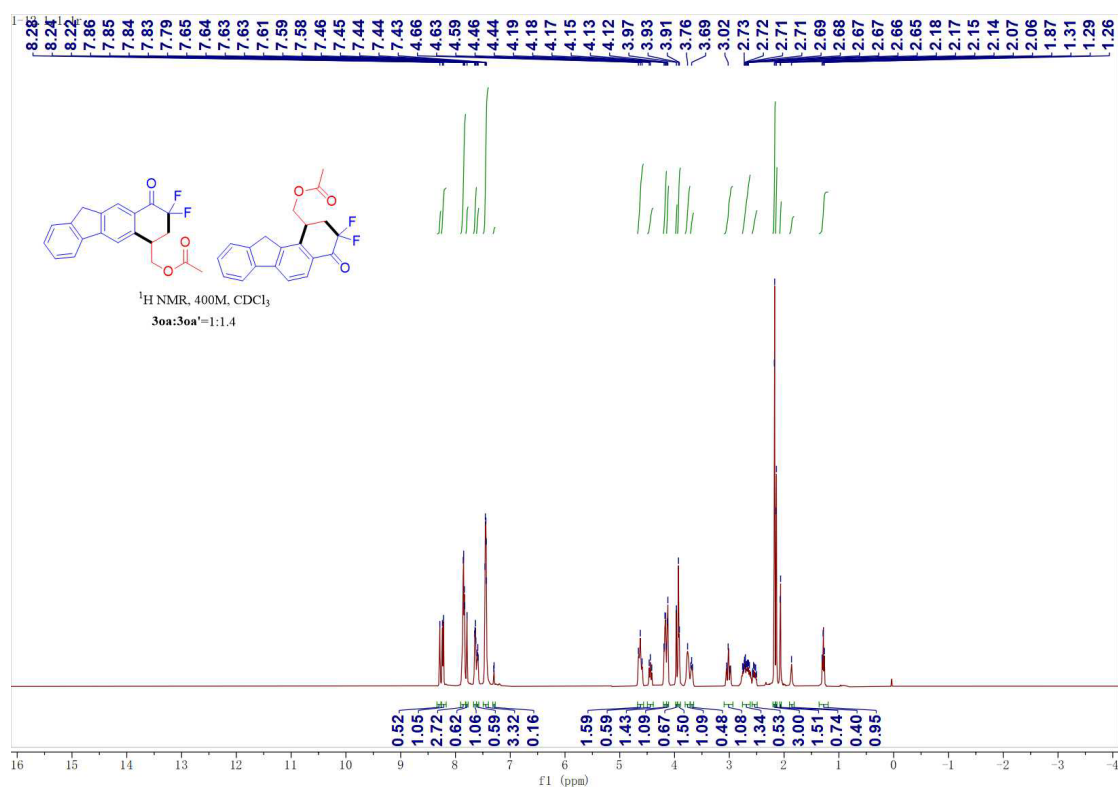

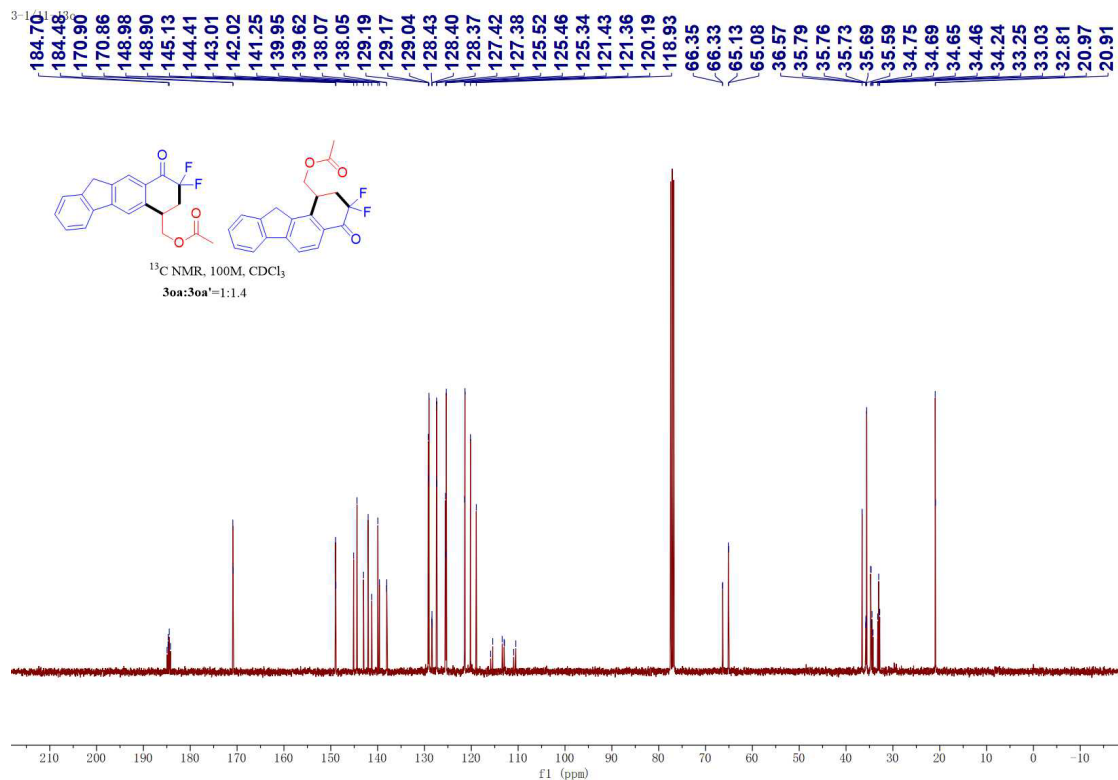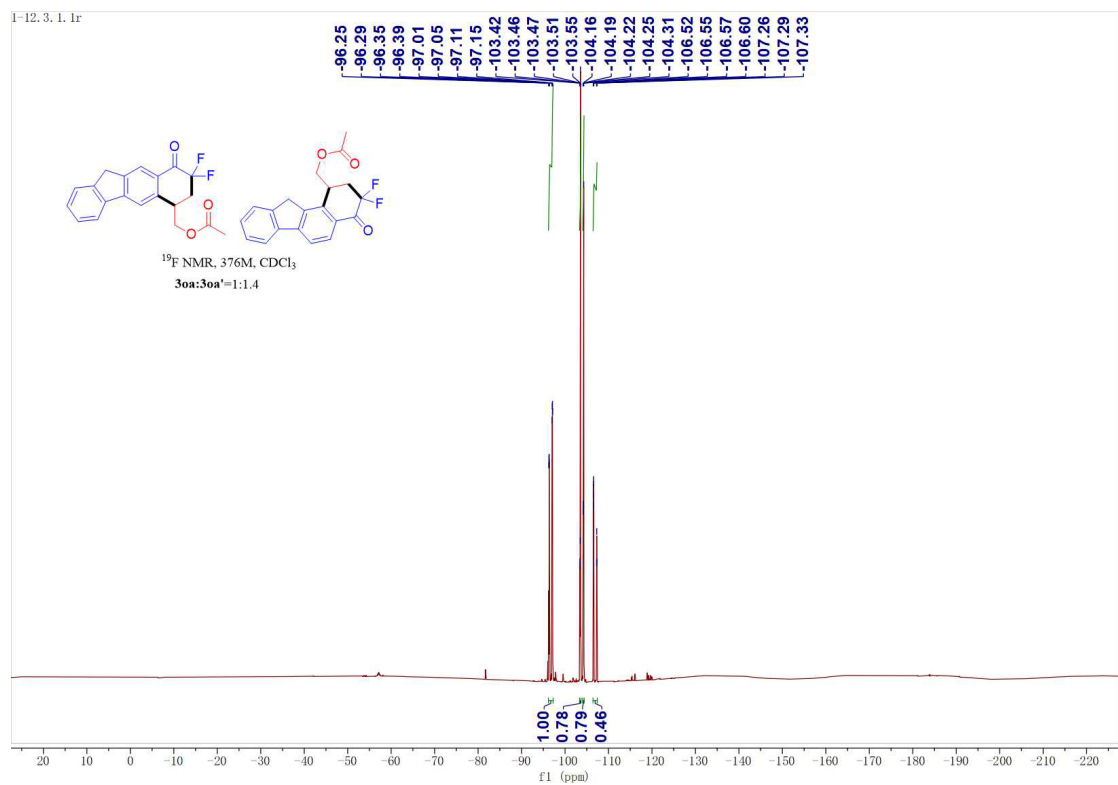

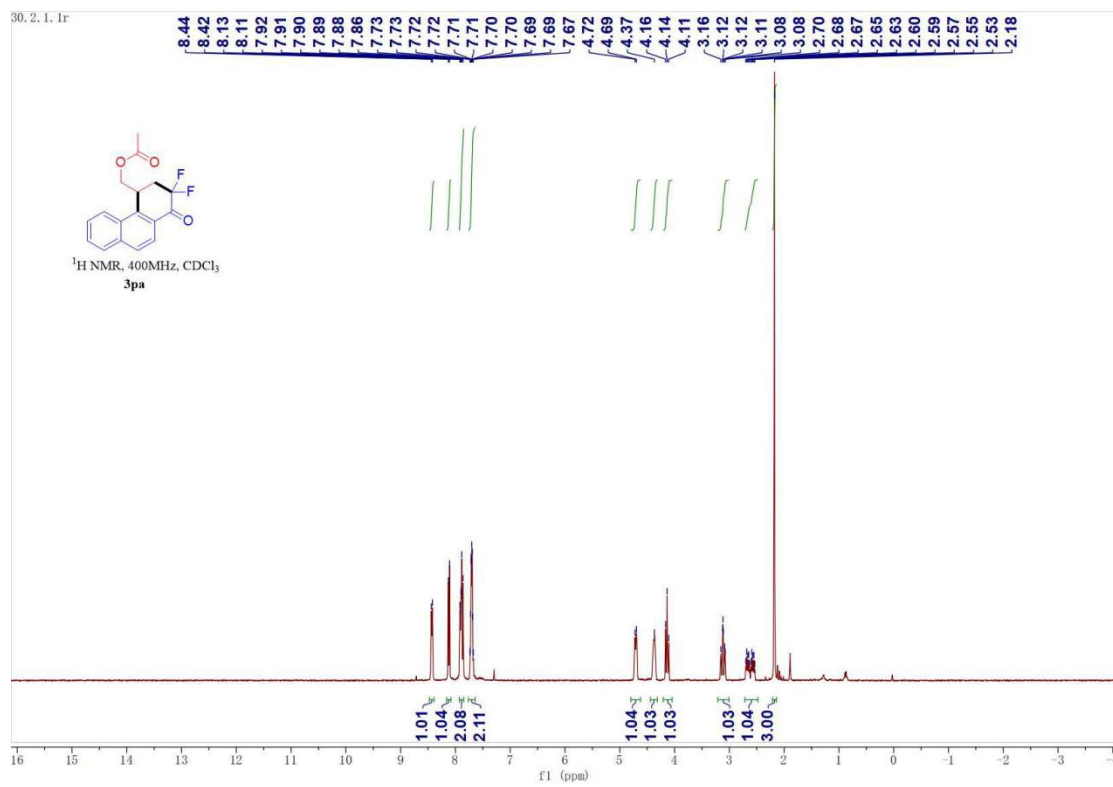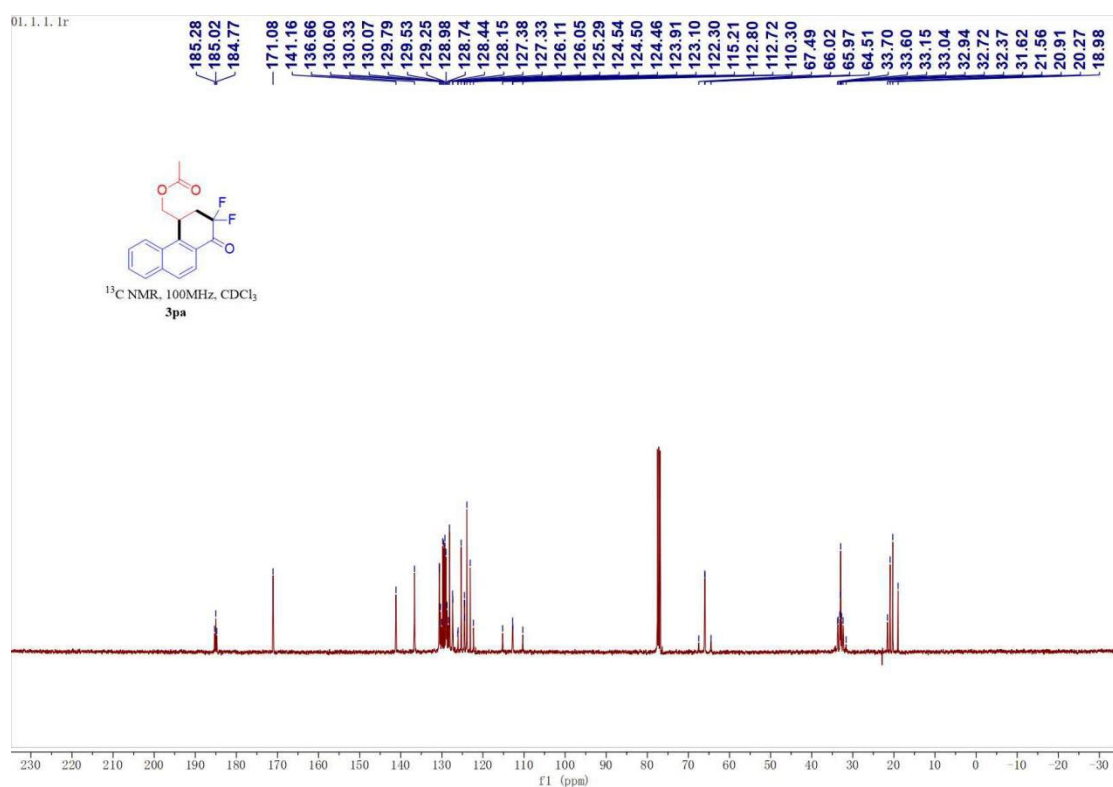

30.3.1.1r

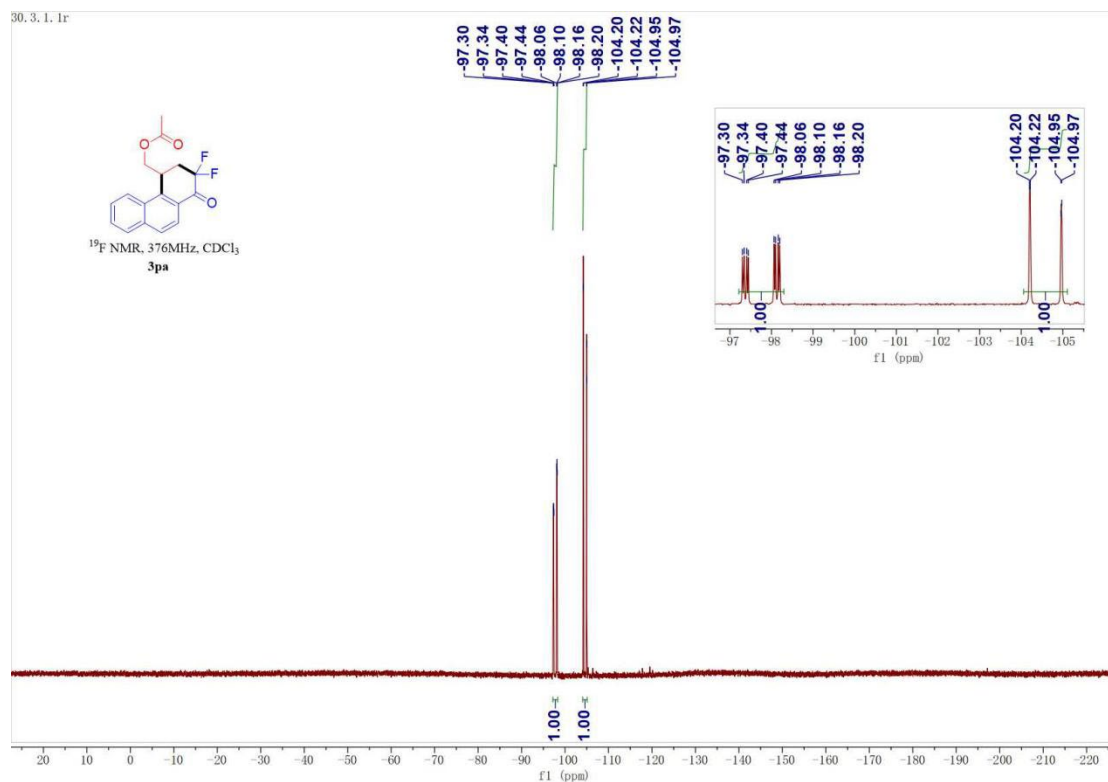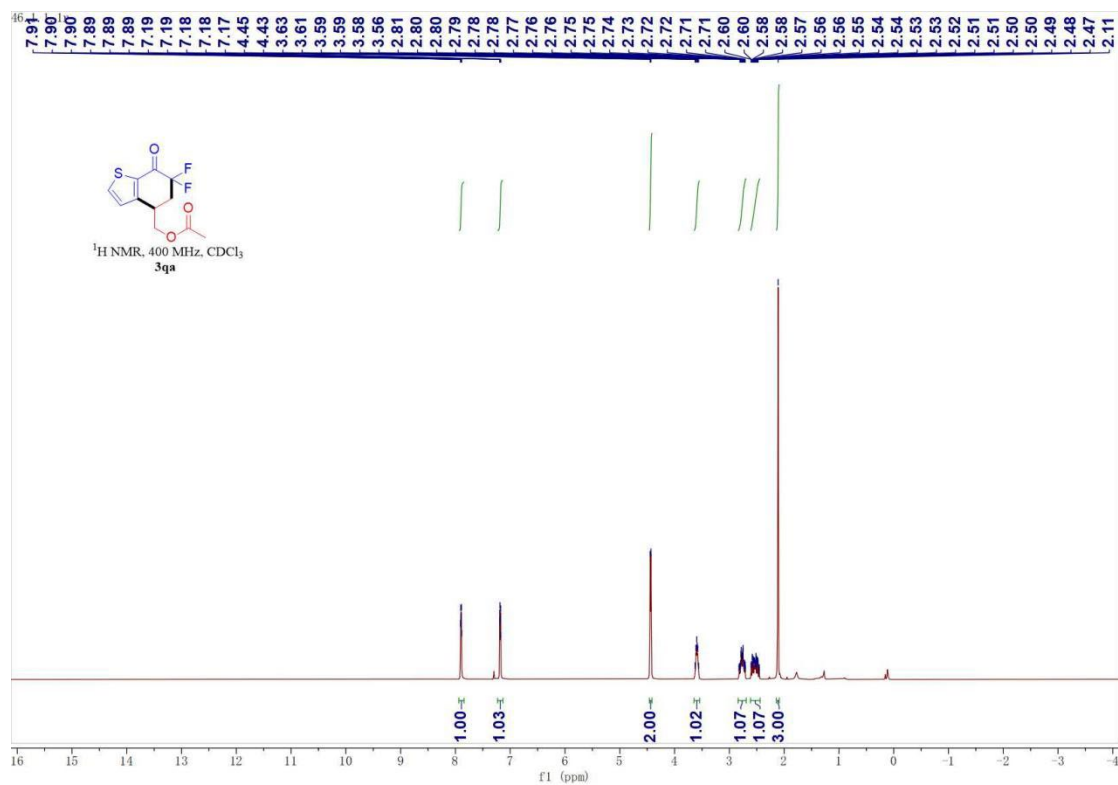

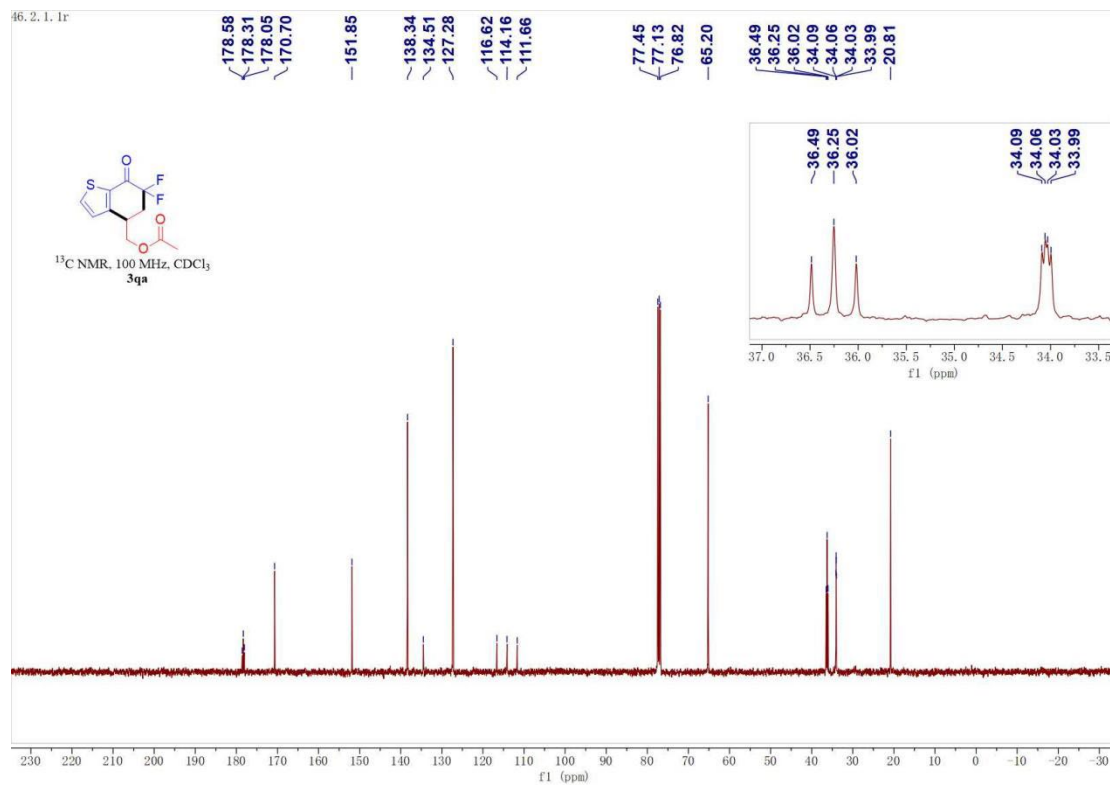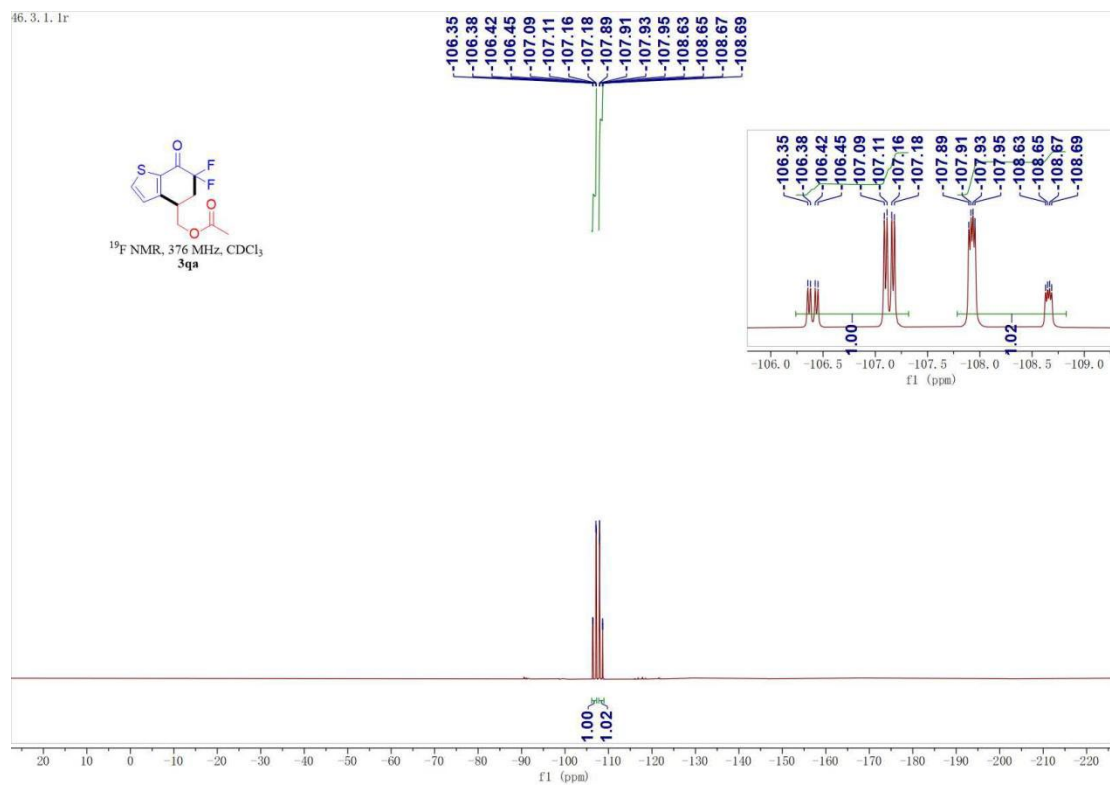



14.1.1.1r

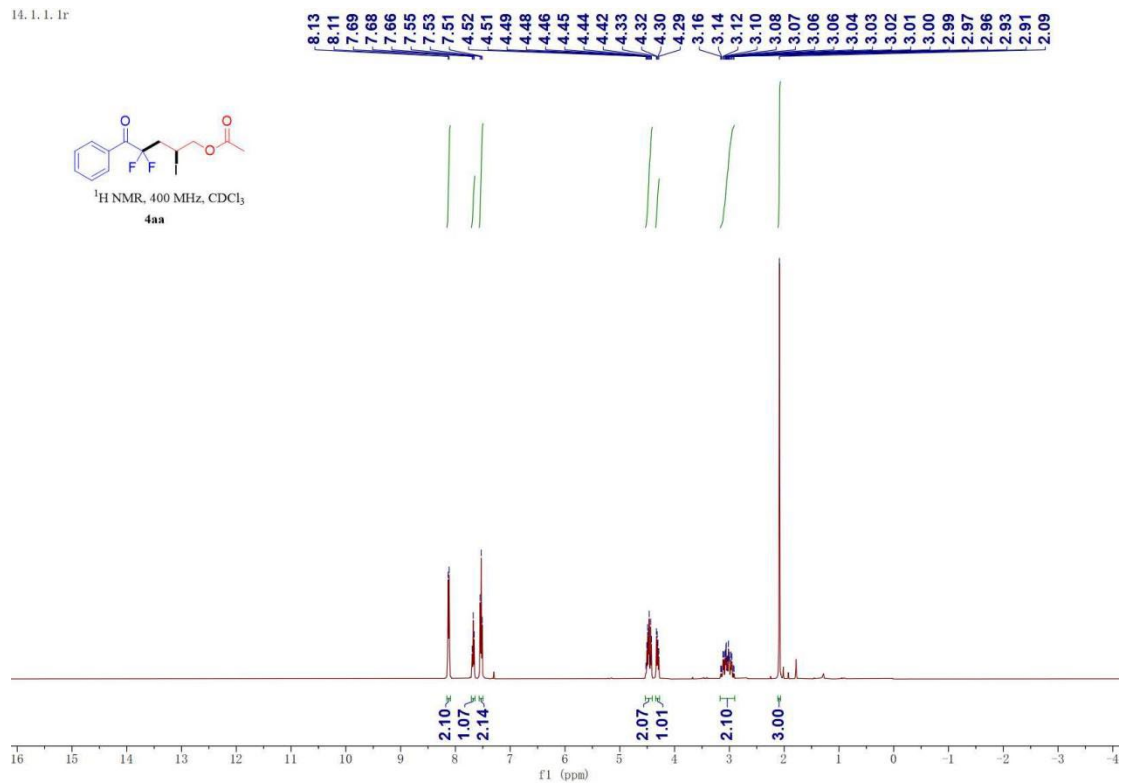

14.2.2.1.1r

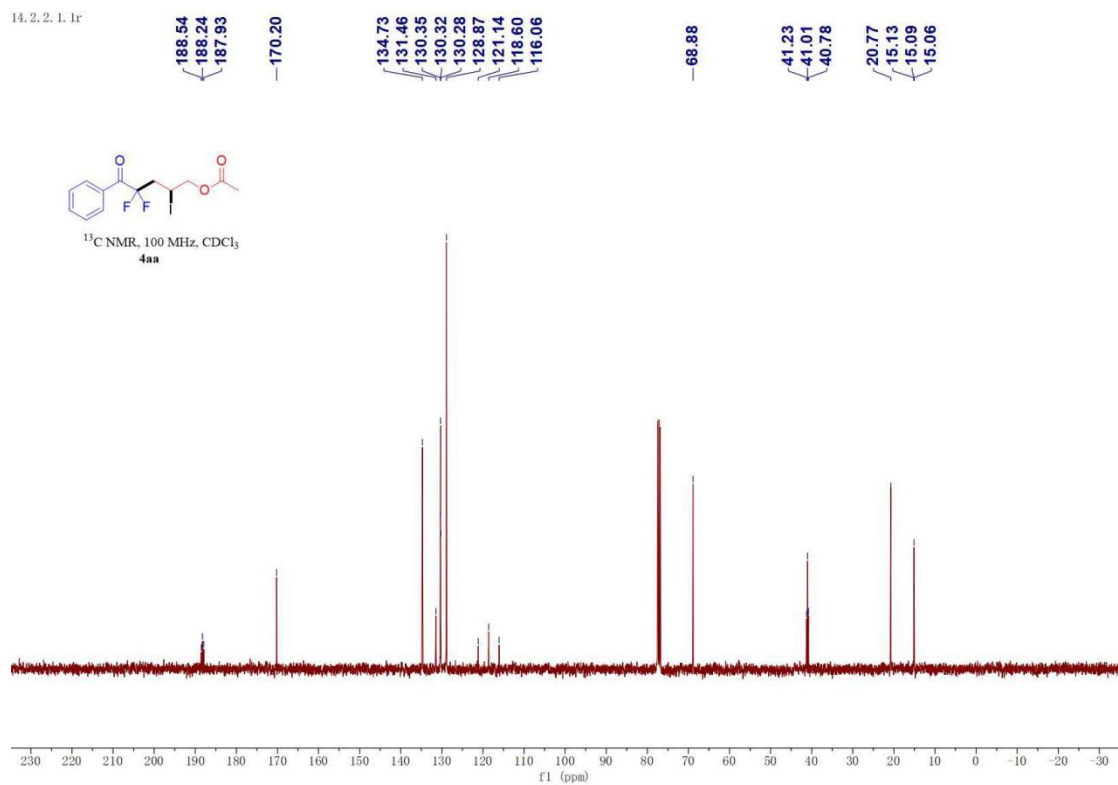

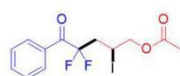

<sup>19</sup>F NMR, 376 MHz, CDCl<sub>3</sub>  
4aa

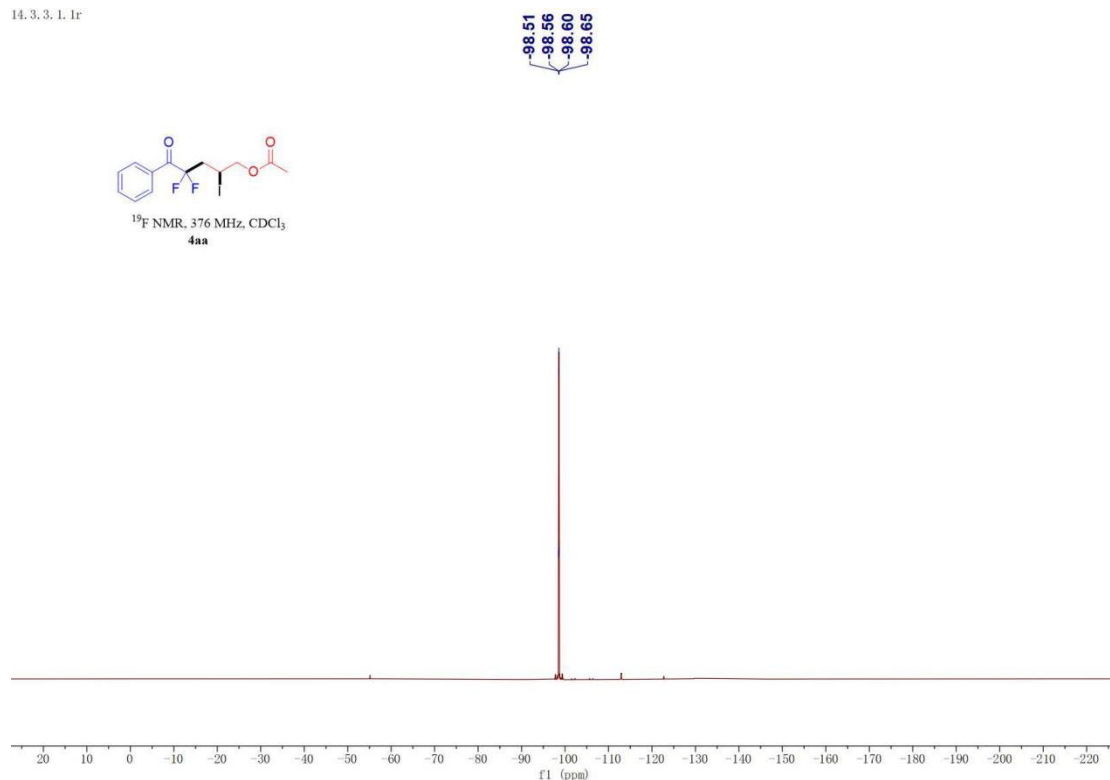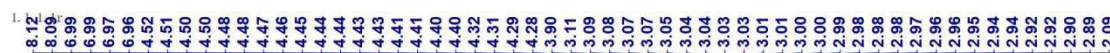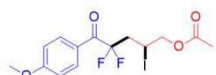

<sup>1</sup>H NMR, 400 MHz, CDCl<sub>3</sub>  
4ba

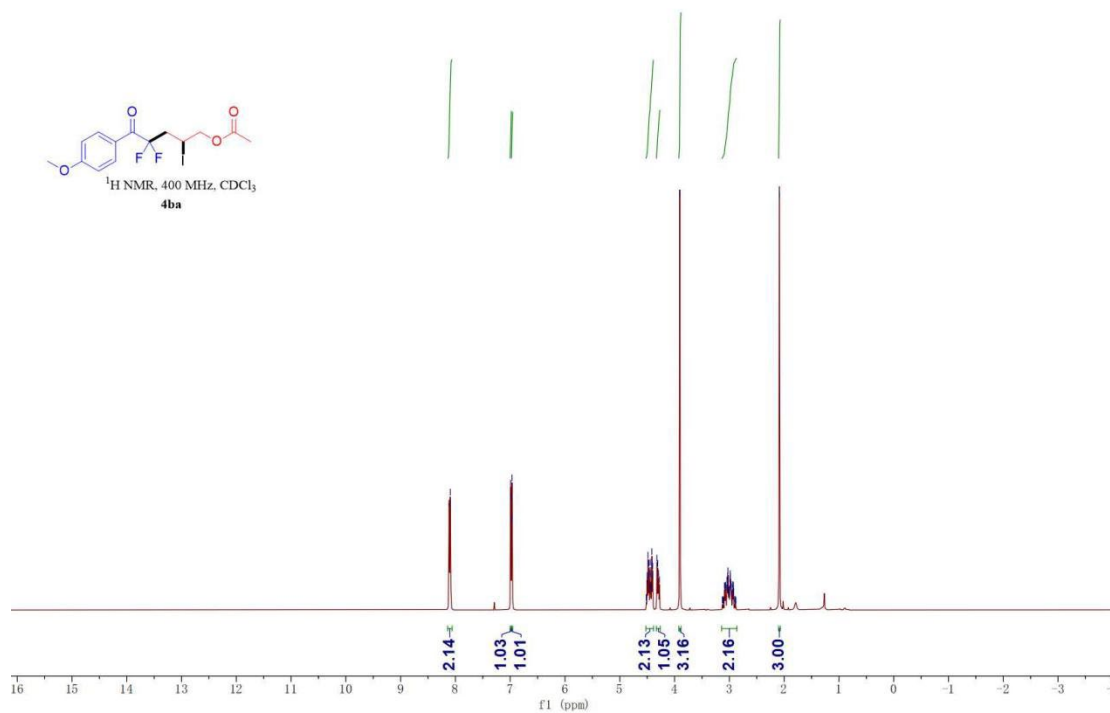

1.2.1.1r

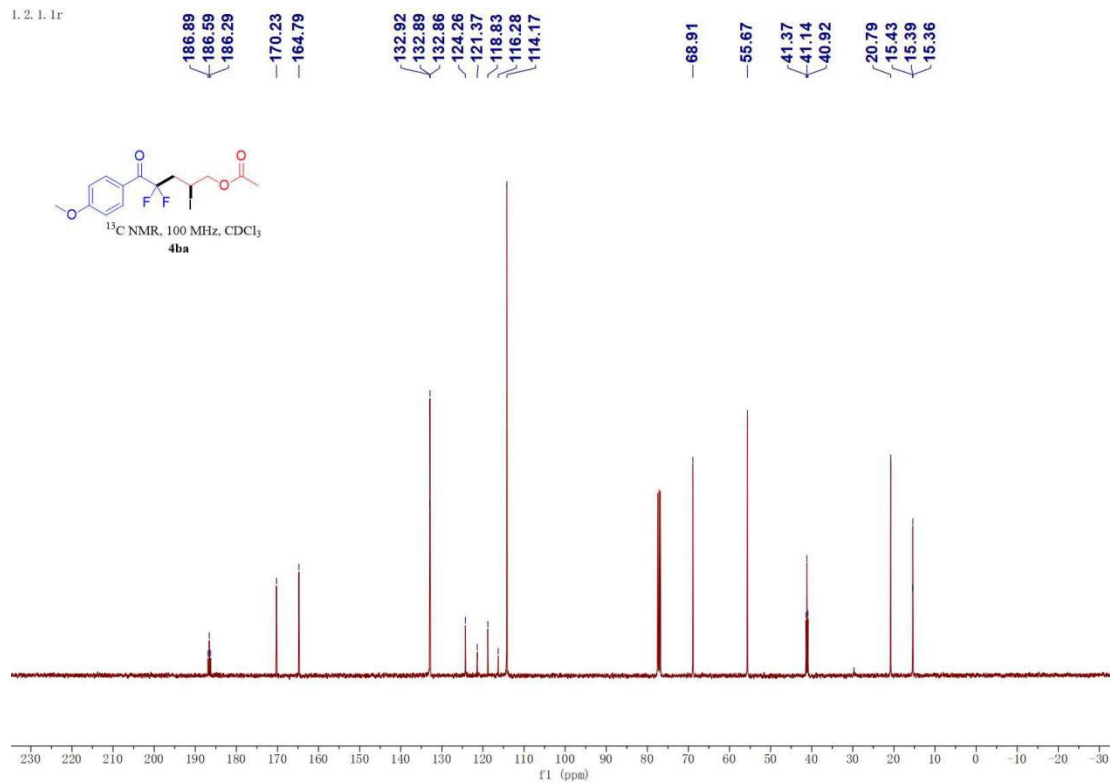

1.3.1.1r

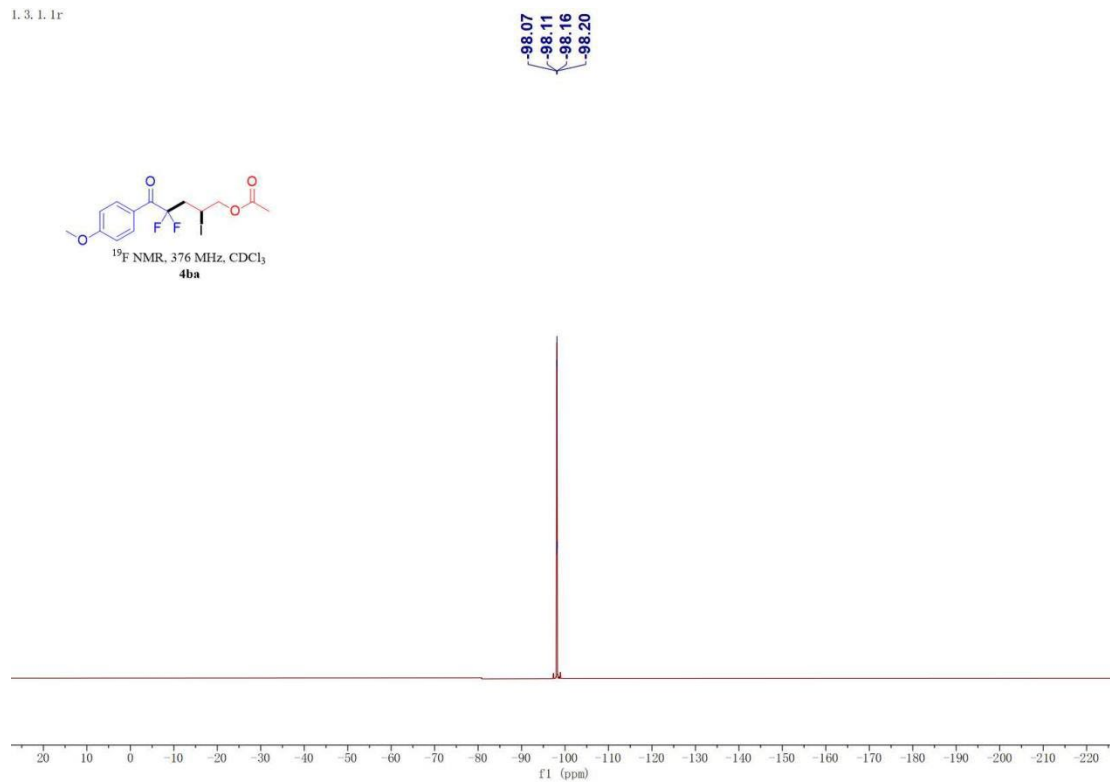

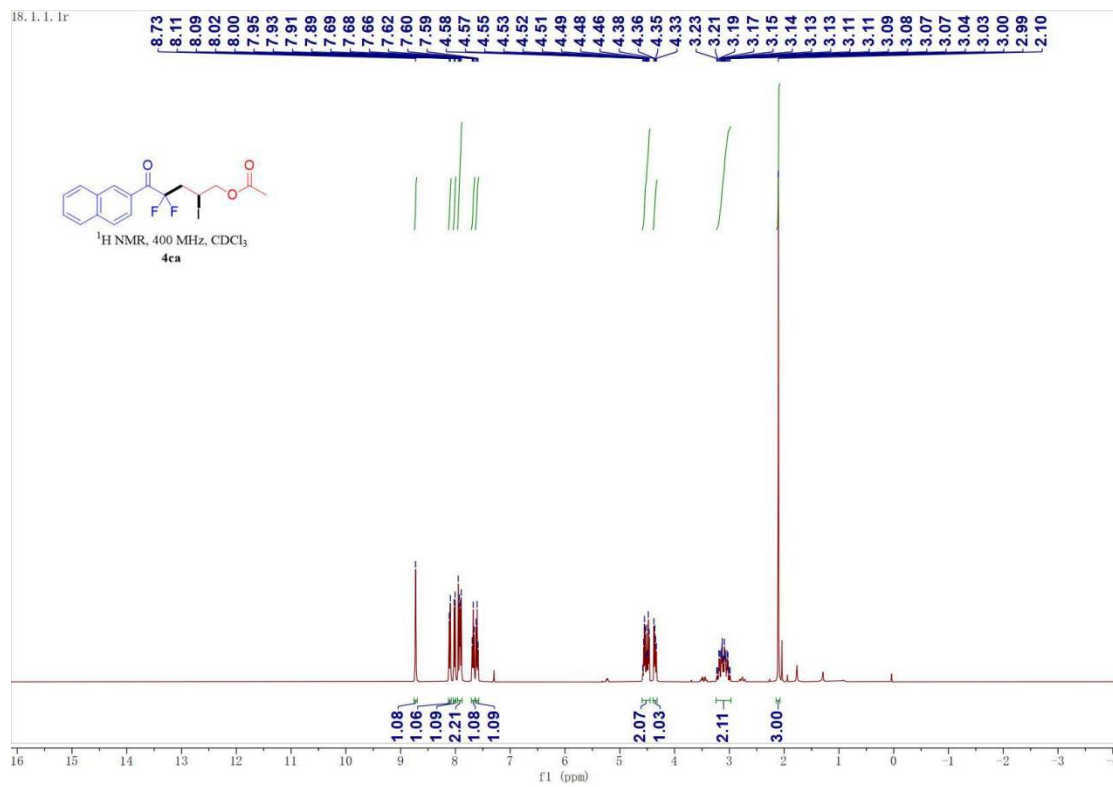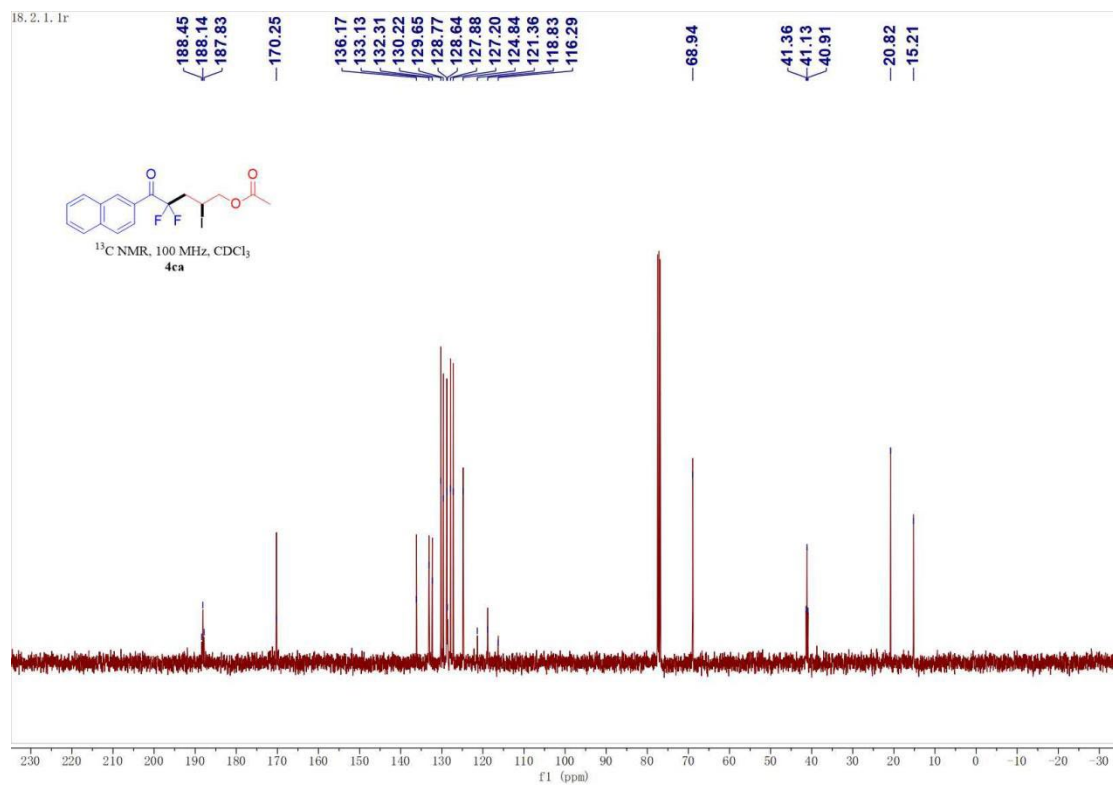

18.3.1.1r

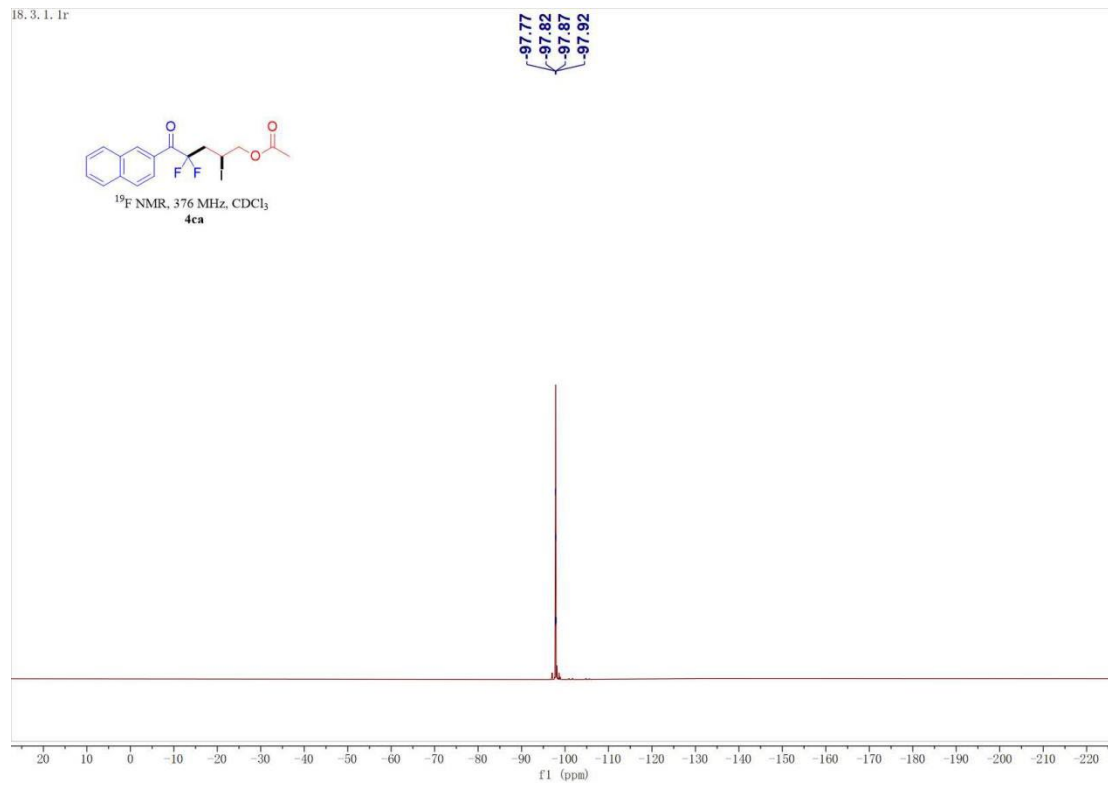

## 9 X-Ray structures

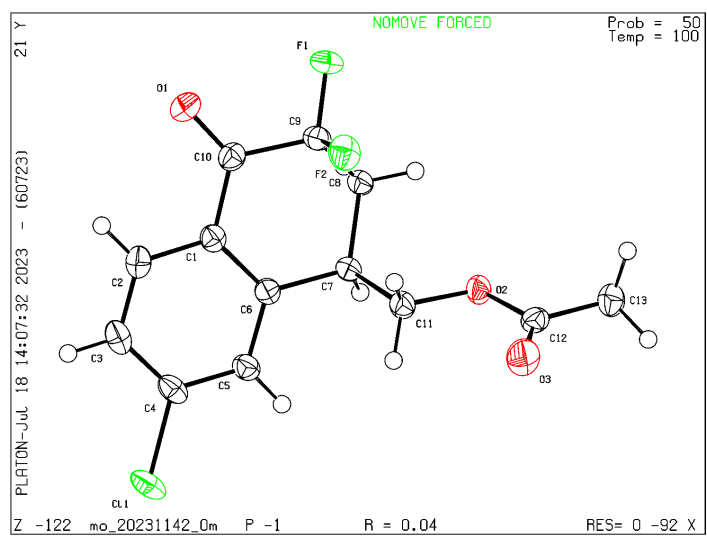

Supplement: d4qo00503a1.pdf [file d4qo00503a1.pdf]
